# Supplementary material for: Gene interaction analysis of psoriasis in Chinese Han population
Source: PubMed Central journal article supplement — Mol Genet Genomic Med. 2022 Mar 30;10(5):e1858. doi: 10.1002/mgg3.1858 (PMC9034666; doi:10.1002/mgg3.1858), 2022-03-30
Supplement: MGG3-10-e1858-s001.pdf [file MGG3-10-e1858-s001.pdf]

| CHR1 | SNP1           | CHR2 | SNP2            | OR_INT  | STAT  | P         | Gene 1   | Gene 2       |
|------|----------------|------|-----------------|---------|-------|-----------|----------|--------------|
| 14   | chr14_64897018 | 19   | chr19_10464687  | 0.5653  | 17.89 | 2.34E-05  | MIR548AZ | TYK2         |
| 16   | chr16_11363025 | 17   | chr17_78171944  | 3.954   | 17.89 | 2.34E-05  | CARD14   | TNP2         |
| 14   | chr14_64897018 | 19   | chr19_10472933  | 0.5768  | 17.88 | 2.35E-05  | MIR548AZ | TYK2         |
| 5    | chr5_158705065 | 10   | chr10_75564624  | 0.302   | 17.52 | 2.85E-05  | NDST2    | UBLCP1       |
| 1    | chr1_234565787 | 9    | chr9_32633719   | 7.783   | 15.54 | 8.06E-05  | TAFIL    | TARBP1       |
| 14   | chr14_64896783 | 19   | chr19_10472933  | 0.594   | 15.35 | 8.95E-05  | MIR548AZ | TYK2         |
| 14   | chr14_64896783 | 19   | chr19_10464687  | 0.5831  | 15.22 | 9.56E-05  | MIR548AZ | TYK2         |
| 5    | chr5_158750013 | 12   | chr12_56398287  | 0.2036  | 15.21 | 9.63E-05  | IL12B    | SUOX         |
| 1    | chr1_234584446 | 16   | chr16_11444716  | 0.8572  | 14.91 | 0.0001125 | RMI2     | TARBP1       |
| 3    | chr3_101576077 | 17   | chr17_26084532  | 8.036   | 14.83 | 0.0001178 | NFKBIZ   | NOS2         |
| 2    | chr2_103095494 | 5    | chr5_132035036  | 8.852   | 14.61 | 0.0001322 | KIF3A    | SLC9A4       |
| 17   | chr17_38029120 | 17   | chr17_38073422  | 0.1839  | 14    | 0.0001824 | GSDMB    | ZBPB2        |
| 14   | chr14_64897018 | 19   | chr19_10475652  | 1.655   | 13.66 | 0.0002187 | MIR548AZ | TYK2         |
| 1    | chr1_158987941 | 12   | chr12_6619794   | 4.649   | 13.43 | 0.0002477 | IFI16    | NCAPD2       |
| 2    | chr2_103095494 | 17   | chr17_38029120  | 0.8122  | 13.39 | 0.0002528 | SLC9A4   | ZBPB2        |
| 1    | chr1_158986477 | 10   | chr10_75214255  | 0.1029  | 13.3  | 0.0002647 | IFI16    | PPP3CB       |
| 12   | chr12_6500105  | 12   | chr12_6562768   | 0.7825  | 13.26 | 0.0002707 | LTBR     | TAPBPL       |
| 5    | chr5_150414388 | 20   | chr20_48599549  | 0.7276  | 13.26 | 0.0002714 | SNAI1    | TNIP1        |
| 10   | chr10_81058027 | 12   | chr12_6626369   | 0.8729  | 13.24 | 0.0002741 | NCAPD2   | ZMIZ1        |
| 5    | chr5_96124296  | 12   | chr12_56336096  | 0.08934 | 13.18 | 0.0002826 | DGKA     | ERAP1        |
| 2    | chr2_102641201 | 4    | chr4_103514445  | 0.8799  | 13.1  | 0.0002949 | IL1R2    | NFKB1        |
| 2    | chr2_103011237 | 6    | chr6_111887624  | 0.2955  | 13.09 | 0.000297  | IL18R1   | TRAF3IP2-AS1 |
| 1    | chr1_158986477 | 12   | chr12_6619794   | 4.226   | 13.07 | 0.0003003 | IFI16    | NCAPD2       |
| 2    | chr2_102960007 | 12   | chr12_112471183 | 0.1753  | 13.06 | 0.0003015 | IL1RL1   | NAA25        |
| 2    | chr2_102960007 | 12   | chr12_6619334   | 2.416   | 12.99 | 0.0003135 | IL1RL1   | NCAPD2       |
| 5    | chr5_150111027 | 19   | chr19_49206631  | 4.188   | 12.98 | 0.000314  | DCTN4    | FUT2         |
| 2    | chr2_103130373 | 5    | chr5_132035036  | 6.739   | 12.96 | 0.0003179 | KIF3A    | SLC9A4       |
| 2    | chr2_102960007 | 10   | chr10_81060474  | 1.14    | 12.93 | 0.0003229 | IL1RL1   | ZMIZ1        |
| 2    | chr2_103039873 | 5    | chr5_132035036  | 5.749   | 12.91 | 0.000326  | IL18RAP  | KIF3A        |
| 5    | chr5_150413406 | 20   | chr20_48599549  | 0.7376  | 12.84 | 0.0003396 | SNAI1    | TNIP1        |
| 1    | chr1_158986225 | 10   | chr10_75214255  | 0.0847  | 12.84 | 0.00034   | IFI16    | PPP3CB       |
| 14   | chr14_64896783 | 19   | chr19_10475652  | 1.649   | 12.81 | 0.0003444 | MIR548AZ | TYK2         |
| 3    | chr3_169500450 | 17   | chr17_40481529  | 0.2633  | 12.71 | 0.0003635 | MYNN     | STAT3        |
| 5    | chr5_150414960 | 20   | chr20_48599549  | 0.7322  | 12.69 | 0.0003674 | SNAI1    | TNIP1        |
| 4    | chr4_103488284 | 12   | chr12_6626369   | 0.1612  | 12.69 | 0.0003685 | NCAPD2   | NFKB1        |
| 1    | chr1_158986225 | 12   | chr12_6619794   | 4.729   | 12.68 | 0.000369  | IFI16    | NCAPD2       |
| 1    | chr1_172502981 | 18   | chr18_12984340  | 7.608   | 12.61 | 0.0003828 | SEHIL    | SUCO         |
| 1    | chr1_152681717 | 1    | chr1_158986225  | 0.457   | 12.57 | 0.000391  | IFI16    | LCE4A        |
| 17   | chr17_40459737 | 19   | chr19_49447806  | 5.421   | 12.55 | 0.0003954 | DHDH     | STAT5A       |
| 2    | chr2_102955683 | 12   | chr12_112471183 | 0.1819  | 12.53 | 0.0004012 | IL1RL1   | NAA25        |
| 16   | chr16_31122571 | 17   | chr17_26110155  | 7.752   | 12.41 | 0.0004272 | BCKDK    | NOS2         |
| 2    | chr2_103040182 | 5    | chr5_132035036  | 5.531   | 12.29 | 0.0004549 | IL18RAP  | KIF3A        |
| 2    | chr2_102998279 | 6    | chr6_111887624  | 0.3111  | 12.29 | 0.0004566 | IL18R1   | TRAF3IP2-AS1 |
| 18   | chr18_12984213 | 19   | chr19_53454387  | 11.18   | 12.26 | 0.0004622 | SEHIL    | ZNF816       |
| 16   | chr16_11009267 | 17   | chr17_38031714  | 1.188   | 12.26 | 0.0004623 | CIITA    | ZBPB2        |
| 17   | chr17_38031714 | 17   | chr17_38073422  | 0.1742  | 12.24 | 0.0004678 | GSDMB    | ZBPB2        |
| 5    | chr5_131720157 | 5    | chr5_150566792  | 0.2669  | 12.21 | 0.0004743 | CCDC69   | SLC22A5      |
| 1    | chr1_234563556 | 3    | chr3_102154071  | 5.736   | 12.2  | 0.0004769 | TARBP1   | ZPLD1        |
| 5    | chr5_158750013 | 16   | chr16_31340664  | 0.191   | 12.2  | 0.000478  | IL12B    | ITGAM        |
| 6    | chr6_405088    | 12   | chr12_6495275   | 0.2609  | 12.16 | 0.000488  | IRF4     | LTBR         |
| 2    | chr2_103006448 | 5    | chr5_132035036  | 5.16    | 12.15 | 0.0004904 | IL18R1   | KIF3A        |
| 4    | chr4_103557251 | 6    | chr6_395246     | 2.702   | 12.13 | 0.0004949 | IRF4     | MANBA        |
| 2    | chr2_62728046  | 16   | chr16_31373240  | 0.4431  | 12.12 | 0.0004983 | ITGAX    | TMEM17       |
| 2    | chr2_102984671 | 12   | chr12_6619334   | 2.442   | 12.11 | 0.0005008 | IL18R1   | NCAPD2       |
| 12   | chr12_6636392  | 17   | chr17_74007641  | 6.906   | 12.11 | 0.0005017 | EVPL     | NCAPD2       |
| 2    | chr2_103095494 | 17   | chr17_38031714  | 0.8176  | 12.09 | 0.0005066 | SLC9A4   | ZBPB2        |
| 12   | chr12_6495275  | 12   | chr12_6562768   | 0.7877  | 12.06 | 0.000515  | LTBR     | TAPBPL       |
| 2    | chr2_103006387 | 12   | chr12_112471183 | 0.1972  | 12.06 | 0.000515  | IL18R1   | NAA25        |
| 1    | chr1_234584446 | 17   | chr17_73723532  | 2.848   | 12.05 | 0.0005188 | ITGB4    | TARBP1       |
| 2    | chr2_103006448 | 19   | chr19_49671451  | 3.814   | 12    | 0.000532  | IL18R1   | TRPM4        |
| 1    | chr1_172634903 | 2    | chr2_103090127  | 0.1208  | 11.97 | 0.000542  | FASLG    | SLC9A4       |
| 5    | chr5_150566792 | 12   | chr12_6128621   | 0.1726  | 11.93 | 0.0005517 | CCDC69   | VWF          |
| 4    | chr4_103561106 | 13   | chr13_40293984  | 11.88   | 11.93 | 0.0005521 | COG6     | MANBA        |

|    |                 |    |                 |         |       |           |          |                   |
|----|-----------------|----|-----------------|---------|-------|-----------|----------|-------------------|
| 16 | chr16_10996577  | 17 | chr17_78180618  | 1.657   | 11.92 | 0.0005558 | CARD14   | CIITA             |
| 11 | chr11_65422853  | 16 | chr16_31122571  | 1.22    | 11.9  | 0.0005605 | BCKDK    | RELA              |
| 2  | chr2_103130373  | 17 | chr17_38029120  | 0.8279  | 11.89 | 0.0005658 | SLC9A4   | ZBP2              |
| 1  | chr1_206972442  | 5  | chr5_96121715   | 2.275   | 11.85 | 0.0005753 | ERAP1    | IL19              |
| 5  | chr5_40269824   | 17 | chr17_40716235  | 5.387   | 11.84 | 0.000579  | COASY    | LINC00603, PTGER4 |
| 17 | chr17_26110007  | 17 | chr17_78178182  | 6.7     | 11.84 | 0.0005792 | CARD14   | NOS2              |
| 2  | chr2_102641201  | 4  | chr4_103534560  | 0.8827  | 11.81 | 0.0005895 | IL1R2    | NFKB1             |
| 2  | chr2_103040177  | 6  | chr6_111887624  | 0.3197  | 11.81 | 0.0005897 | IL18RAP  | TRAF3IP2-AS1      |
| 17 | chr17_26084532  | 19 | chr19_49095114  | 10.62   | 11.8  | 0.0005936 | NOS2     | SULT2B1           |
| 17 | chr17_26110007  | 17 | chr17_78178189  | 6.676   | 11.8  | 0.0005939 | CARD14   | NOS2              |
| 10 | chr10_90034899  | 17 | chr17_74169949  | 9.427   | 11.78 | 0.0005986 | RNF157   | RNLS              |
| 1  | chr1_159002222  | 16 | chr16_31332628  | 0.2483  | 11.77 | 0.0006024 | IFI16    | ITGAM             |
| 17 | chr17_78178182  | 19 | chr19_53357378  | 6.077   | 11.76 | 0.0006047 | CARD14   | ZNF468            |
| 3  | chr3_121647656  | 19 | chr19_10104154  | 1.175   | 11.74 | 0.0006111 | COL5A3   | SLC15A2           |
| 2  | chr2_102968007  | 5  | chr5_132035036  | 4.723   | 11.72 | 0.0006188 | IL1RL1   | KIF3A             |
| 12 | chr12_56604526  | 17 | chr17_78178189  | 3.501   | 11.71 | 0.0006222 | CARD14   | RNF41             |
| 2  | chr2_102957348  | 11 | chr11_128354978 | 10.63   | 11.66 | 0.0006374 | ETS1     | IL1RL1            |
| 2  | chr2_103095494  | 17 | chr17_38063381  | 0.8199  | 11.64 | 0.000644  | GSDMB    | SLC9A4            |
| 17 | chr17_73888273  | 17 | chr17_78247114  | 20.27   | 11.64 | 0.0006469 | RNF213   | TRIM65            |
| 7  | chr7_37298903   | 18 | chr18_12984340  | 4.155   | 11.61 | 0.0006558 | ELMO1    | SEH1L             |
| 2  | chr2_103090127  | 12 | chr12_112471183 | 0.2068  | 11.56 | 0.0006721 | NAA25    | SLC9A4            |
| 6  | chr6_351163     | 12 | chr12_6483463   | 3.379   | 11.53 | 0.0006865 | DUSP22   | SCNN1A            |
| 17 | chr17_38063381  | 17 | chr17_73888273  | 1.21    | 11.52 | 0.0006873 | GSDMB    | TRIM65            |
| 17 | chr17_38063381  | 19 | chr19_53357239  | 1.446   | 11.52 | 0.0006878 | GSDMB    | ZNF468            |
| 5  | chr5_79768604   | 12 | chr12_6483463   | 0.2657  | 11.52 | 0.0006901 | SCNN1A   | ZFYVE16           |
| 12 | chr12_111992217 | 17 | chr17_38153554  | 8.223   | 11.49 | 0.0007008 | ATXN2    | PSMD3             |
| 3  | chr3_169500450  | 17 | chr17_40459737  | 3.698   | 11.47 | 0.0007086 | MYNN     | STAT5A            |
| 16 | chr16_11009267  | 17 | chr17_38029120  | 1.176   | 11.45 | 0.0007144 | CIITA    | ZBP2              |
| 1  | chr1_234546228  | 19 | chr19_10085062  | 0.06149 | 11.43 | 0.0007218 | COL5A3   | TARBP1            |
| 1  | chr1_206972442  | 5  | chr5_96117300   | 2.242   | 11.43 | 0.0007226 | ERAP1    | IL19              |
| 3  | chr3_45187671   | 5  | chr5_131822829  | 6.603   | 11.43 | 0.0007237 | CDCP1    | IRF1              |
| 2  | chr2_103095494  | 17 | chr17_38024626  | 0.8218  | 11.42 | 0.0007268 | SLC9A4   | ZBP2              |
| 1  | chr1_67889571   | 5  | chr5_131995866  | 4.226   | 11.41 | 0.0007302 | IL13     | SERBP1            |
| 2  | chr2_103130373  | 19 | chr19_10114795  | 6.315   | 11.4  | 0.0007332 | COL5A3   | SLC9A4            |
| 1  | chr1_159002778  | 16 | chr16_31332628  | 0.2683  | 11.39 | 0.0007396 | IFI16    | ITGAM             |
| 2  | chr2_163136771  | 16 | chr16_31372344  | 9.741   | 11.35 | 0.000755  | IFIH1    | ITGAX             |
| 2  | chr2_103125466  | 20 | chr20_48439692  | 0.2147  | 11.35 | 0.0007564 | SLC9A4   | SLC9A8            |
| 5  | chr5_96235958   | 5  | chr5_150566792  | 0.3311  | 11.34 | 0.0007582 | CCDC69   | ERAP2             |
| 16 | chr16_11009267  | 17 | chr17_38063381  | 1.18    | 11.33 | 0.0007612 | CIITA    | GSDMB             |
| 2  | chr2_103095494  | 11 | chr11_128354978 | 12.38   | 11.32 | 0.0007656 | ETS1     | SLC9A4            |
| 12 | chr12_6562768   | 17 | chr17_74007641  | 7.386   | 11.32 | 0.0007663 | EVPL     | TAPBP1            |
| 2  | chr2_102968211  | 5  | chr5_132035036  | 4.738   | 11.32 | 0.0007672 | IL1RL1   | KIF3A             |
| 2  | chr2_102998279  | 3  | chr3_45187671   | 1.184   | 11.28 | 0.0007846 | CDCP1    | IL18R1            |
| 2  | chr2_163137871  | 16 | chr16_31372344  | 9.651   | 11.26 | 0.0007926 | IFIH1    | ITGAX             |
| 2  | chr2_102955683  | 12 | chr12_6619334   | 2.302   | 11.24 | 0.0008017 | IL1RL1   | NCAPD2            |
| 11 | chr11_65422853  | 16 | chr16_30936081  | 1.235   | 11.24 | 0.0008026 | FBXL19   | RELA              |
| 2  | chr2_102968211  | 12 | chr12_56482032  | 14.83   | 11.23 | 0.0008058 | ERBB3    | IL1RL1            |
| 1  | chr1_234563556  | 9  | chr9_32633719   | 4.829   | 11.23 | 0.0008068 | TAF1L    | TARBP1            |
| 2  | chr2_103011237  | 3  | chr3_45187671   | 1.185   | 11.19 | 0.0008213 | CDCP1    | IL18R1            |
| 1  | chr1_234573171  | 9  | chr9_32633719   | 4.813   | 11.18 | 0.0008268 | TAF1L    | TARBP1            |
| 2  | chr2_61389935   | 12 | chr12_6483851   | 0.2323  | 11.18 | 0.0008279 | C2orf74  | SCNN1A            |
| 20 | chr20_48461713  | 20 | chr20_48524827  | 3.828   | 11.17 | 0.0008303 | SLC9A8   | SPATA2            |
| 2  | chr2_102957348  | 5  | chr5_132035036  | 5.067   | 11.16 | 0.0008348 | IL1RL1   | KIF3A             |
| 2  | chr2_103006448  | 3  | chr3_45187671   | 1.188   | 11.16 | 0.000838  | CDCP1    | IL18R1            |
| 4  | chr4_103594938  | 12 | chr12_56437315  | 0.283   | 11.15 | 0.0008392 | MANBA    | RPS26             |
| 2  | chr2_102997884  | 5  | chr5_132035036  | 5.063   | 11.15 | 0.0008398 | IL18R1   | KIF3A             |
| 12 | chr12_6204763   | 17 | chr17_40481529  | 3.384   | 11.15 | 0.00084   | STAT3    | VWF               |
| 2  | chr2_103040945  | 12 | chr12_112471183 | 0.2105  | 11.15 | 0.0008422 | IL18RAP  | NAA25             |
| 16 | chr16_31095204  | 17 | chr17_26110155  | 6.012   | 11.15 | 0.0008423 | NOS2     | PRSS53            |
| 2  | chr2_62450631   | 19 | chr19_49693774  | 4.284   | 11.14 | 0.0008449 | B3GNT2   | TRPM4             |
| 1  | chr1_234573171  | 17 | chr17_73723532  | 2.82    | 11.14 | 0.000846  | ITGB4    | TARBP1            |
| 1  | chr1_26524108   | 4  | chr4_103594938  | 2.556   | 11.11 | 0.0008584 | CATSPER4 | MANBA             |
| 17 | chr17_26110007  | 17 | chr17_78178170  | 0.1814  | 11.09 | 0.0008688 | CARD14   | NOS2              |
| 1  | chr1_67838353   | 5  | chr5_96222185   | 3.255   | 11.09 | 0.00087   | ERAP2    | IL12RB2           |

|    |                |    |                 |         |       |           |               |               |
|----|----------------|----|-----------------|---------|-------|-----------|---------------|---------------|
| 12 | chr12_6464958  | 19 | chr19_10472933  | 0.3211  | 11.09 | 0.0008702 | SCNN1A        | TYK2          |
| 1  | chr1_234565787 | 17 | chr17_73723532  | 2.797   | 11.08 | 0.0008743 | ITGB4         | TARBP1        |
| 17 | chr17_38024626 | 17 | chr17_38073422  | 0.2154  | 11.06 | 0.0008836 | GSDMB         | ZBPB2         |
| 3  | chr3_45187671  | 5  | chr5_79374474   | 0.2781  | 11.06 | 0.0008842 | CDCP1         | CTD-2201I18.1 |
| 1  | chr1_152759678 | 17 | chr17_40498461  | 0.6398  | 11.06 | 0.0008845 | LCE1E         | STAT3         |
| 17 | chr17_38029120 | 19 | chr19_53357239  | 1.424   | 11.04 | 0.0008894 | ZNF468        | ZBPB2         |
| 17 | chr17_78171944 | 19 | chr19_10096742  | 0.5268  | 11.04 | 0.000891  | CARD14        | COL5A3        |
| 2  | chr2_103040177 | 5  | chr5_132035036  | 4.789   | 11.02 | 0.0009033 | IL18RAP       | KIF3A         |
| 1  | chr1_152329369 | 1  | chr1_206972365  | 5.86    | 11.01 | 0.0009061 | FLG2          | IL19          |
| 16 | chr16_31095251 | 17 | chr17_26110155  | 5.869   | 10.99 | 0.0009137 | NOS2          | PRSS53        |
| 2  | chr2_103130373 | 11 | chr11_128354978 | 11.95   | 10.99 | 0.0009144 | ETS1          | SLC9A4        |
| 4  | chr4_103806467 | 12 | chr12_6861043   | 0.1391  | 10.99 | 0.0009163 | CISD2, SLC9B1 | MLF2          |
| 2  | chr2_103136485 | 5  | chr5_96252998   | 3.073   | 10.96 | 0.0009308 | ERAP2         | SLC9A4        |
| 12 | chr12_6632473  | 16 | chr16_11444716  | 7.505   | 10.96 | 0.0009314 | NCAPD2        | RMI2          |
| 1  | chr1_152732436 | 4  | chr4_103516049  | 3.779   | 10.94 | 0.0009392 | KPRP          | NFKB1         |
| 2  | chr2_102968362 | 5  | chr5_96116995   | 5.773   | 10.92 | 0.0009526 | ERAP1         | IL1RL1        |
| 1  | chr1_152595565 | 2  | chr2_163291617  | 0.1995  | 10.92 | 0.0009531 | KCNH7         | LCE3A         |
| 12 | chr12_56385966 | 13 | chr13_20763612  | 0.07429 | 10.92 | 0.0009531 | GJB2          | RAB5B         |
| 12 | chr12_6626369  | 17 | chr17_38345233  | 4.458   | 10.91 | 0.0009574 | NCAPD2        | RAPGEFL1      |
| 5  | chr5_150566792 | 11 | chr11_128426166 | 0.07442 | 10.9  | 0.0009593 | CCDC69        | ETS1          |
| 8  | chr8_3245242   | 17 | chr17_78178182  | 0.3681  | 10.87 | 0.0009783 | CARD14        | CSMD1         |
| 2  | chr2_103130373 | 17 | chr17_38024626  | 0.8314  | 10.87 | 0.0009788 | SLC9A4        | ZBPB2         |
| 2  | chr2_103011237 | 12 | chr12_6623942   | 0.1221  | 10.86 | 0.0009845 | IL18R1        | NCAPD2        |
| 19 | chr19_10108850 | 19 | chr19_10264986  | 18.66   | 10.84 | 0.0009915 | COL5A3        | DNMT1         |
| 2  | chr2_62450631  | 6  | chr6_138197186  | 8.869   | 10.84 | 0.0009958 | B3GNT2        | TNFAIP3       |
| 2  | chr2_103130373 | 17 | chr17_38031714  | 0.8326  | 10.82 | 0.001005  | SLC9A4        | ZBPB2         |
| 1  | chr1_152277066 | 16 | chr16_11444716  | 0.1926  | 10.81 | 0.001012  | FLG           | RMI2          |
| 17 | chr17_78178830 | 19 | chr19_53357378  | 0.1868  | 10.81 | 0.001012  | CARD14        | ZNF468        |
| 5  | chr5_158705065 | 8  | chr8_3245242    | 0.369   | 10.8  | 0.001017  | CSMD1         | UBLCP1        |
| 2  | chr2_103006387 | 10 | chr10_81060474  | 1.123   | 10.74 | 0.001047  | IL18R1        | ZMIZ1         |
| 3  | chr3_121631979 | 12 | chr12_6861043   | 0.3059  | 10.74 | 0.001051  | MLF2          | SLC15A2       |
| 2  | chr2_163136727 | 16 | chr16_31372344  | 9.109   | 10.71 | 0.001065  | IFIH1         | ITGAX         |
| 1  | chr1_152770589 | 17 | chr17_26116762  | 0.3609  | 10.7  | 0.001071  | LCE1D         | NOS2          |
| 8  | chr8_3245242   | 17 | chr17_78178189  | 0.3614  | 10.7  | 0.001071  | CARD14        | CSMD1         |
| 1  | chr1_152759678 | 4  | chr4_103516049  | 3.814   | 10.7  | 0.001073  | LCE1E         | NFKB1         |
| 2  | chr2_103121682 | 17 | chr17_26116896  | 0.2858  | 10.69 | 0.001076  | NOS2          | SLC9A4        |
| 2  | chr2_103125466 | 12 | chr12_6619334   | 2.149   | 10.69 | 0.001076  | NCAPD2        | SLC9A4        |
| 5  | chr5_158753821 | 19 | chr19_10108861  | 13.57   | 10.69 | 0.001077  | COL5A3        | IL12B         |
| 1  | chr1_207009910 | 12 | chr12_56480471  | 0.1797  | 10.67 | 0.001091  | ERBB3         | IL19          |
| 1  | chr1_67889571  | 12 | chr12_112525537 | 0.2559  | 10.65 | 0.001098  | NAA25         | SERBP1        |
| 1  | chr1_152770589 | 4  | chr4_103516049  | 4.188   | 10.64 | 0.001105  | LCE1D         | NFKB1         |
| 10 | chr10_81056383 | 19 | chr19_49206631  | 1.215   | 10.64 | 0.001109  | FUT2          | ZMIZ1         |
| 17 | chr17_78093204 | 19 | chr19_53454387  | 6.574   | 10.62 | 0.001116  | GAA           | ZNF816        |
| 2  | chr2_62728105  | 16 | chr16_31373240  | 0.4716  | 10.61 | 0.001127  | ITGAX         | TMEM17        |
| 2  | chr2_62450631  | 12 | chr12_56362011  | 0.03159 | 10.59 | 0.001136  | B3GNT2        | CDK2          |
| 12 | chr12_6861043  | 12 | chr12_56436112  | 5.368   | 10.58 | 0.00114   | MLF2          | RPS26         |
| 5  | chr5_96509055  | 6  | chr6_111922466  | 0.2843  | 10.58 | 0.001146  | RIOK2         | TRAF3IP2-AS1  |
| 17 | chr17_26084532 | 17 | chr17_40481596  | 2.503   | 10.57 | 0.00115   | NOS2          | STAT3         |
| 1  | chr1_234573171 | 5  | chr5_96124296   | 1.204   | 10.56 | 0.001156  | ERAP1         | TARBP1        |
| 2  | chr2_62728105  | 19 | chr19_10080537  | 2.608   | 10.56 | 0.001157  | COL5A3        | TMEM17        |
| 1  | chr1_26524108  | 4  | chr4_103594918  | 2.553   | 10.54 | 0.001168  | CATSPER4      | MANBA         |
| 2  | chr2_102641201 | 4  | chr4_103553090  | 1.122   | 10.53 | 0.001174  | IL1R2         | MANBA         |
| 2  | chr2_102955683 | 10 | chr10_81060474  | 1.127   | 10.53 | 0.001176  | IL1RL1        | ZMIZ1         |
| 17 | chr17_78178170 | 19 | chr19_53357378  | 0.1994  | 10.53 | 0.001177  | CARD14        | ZNF468        |
| 5  | chr5_132035036 | 17 | chr17_78178189  | 2.846   | 10.52 | 0.00118   | CARD14        | KIF3A         |
| 12 | chr12_6483463  | 18 | chr18_12802181  | 7.013   | 10.52 | 0.001182  | PTPN2         | SCNN1A        |
| 5  | chr5_158750013 | 16 | chr16_11066958  | 0.2409  | 10.51 | 0.001187  | CLEC16A       | IL12B         |
| 2  | chr2_102641201 | 17 | chr17_38153712  | 0.3056  | 10.51 | 0.001188  | IL1R2         | PSMD3         |
| 1  | chr1_158987941 | 16 | chr16_31332628  | 0.3263  | 10.5  | 0.001191  | IFI16         | ITGAM         |
| 1  | chr1_207013378 | 5  | chr5_96237114   | 6.52    | 10.48 | 0.001205  | ERAP2         | IL19          |
| 1  | chr1_172633592 | 2  | chr2_102967928  | 3.117   | 10.46 | 0.001218  | FASLG         | IL1RL1        |
| 1  | chr1_234584446 | 9  | chr9_32633719   | 4.478   | 10.46 | 0.001219  | TAFIL         | TARBP1        |
| 2  | chr2_103006448 | 12 | chr12_6623942   | 0.1389  | 10.46 | 0.00122   | IL18R1        | NCAPD2        |
| 5  | chr5_158750013 | 14 | chr14_64896783  | 1.521   | 10.44 | 0.001234  | IL12B         | MIR548AZ      |

|    |                 |    |                 |        |       |          |           |          |
|----|-----------------|----|-----------------|--------|-------|----------|-----------|----------|
| 1  | chr1_172634903  | 2  | chr2_103006387  | 0.1814 | 10.44 | 0.001236 | FASLG     | IL18R1   |
| 5  | chr5_96237114   | 5  | chr5_131726375  | 19.28  | 10.44 | 0.001236 | ERAP2     | SLC22A5  |
| 2  | chr2_103006448  | 12 | chr12_56437315  | 0.1208 | 10.43 | 0.001237 | IL18R1    | RPS26    |
| 2  | chr2_61180244   | 5  | chr5_96237114   | 2.26   | 10.43 | 0.001237 | ERAP2     | PUS10    |
| 1  | chr1_152681717  | 1  | chr1_158986477  | 0.4828 | 10.42 | 0.001248 | IFI16     | LCE4A    |
| 2  | chr2_62450631   | 12 | chr12_6636339   | 0.2211 | 10.42 | 0.00125  | B3GNT2    | NCAPD2   |
| 17 | chr17_78180618  | 19 | chr19_53453585  | 4.932  | 10.41 | 0.001256 | CARD14    | ZNF816   |
| 8  | chr8_3245242    | 17 | chr17_78178170  | 2.825  | 10.41 | 0.001256 | CARD14    | CSMD1    |
| 1  | chr1_158986225  | 17 | chr17_26115966  | 0.2209 | 10.4  | 0.00126  | IFI16     | NOS2     |
| 1  | chr1_206972442  | 5  | chr5_96118852   | 2.147  | 10.4  | 0.001263 | ERAP1     | IL19     |
| 12 | chr12_111992217 | 17 | chr17_38173143  | 5.77   | 10.39 | 0.001267 | ATXN2     | CSF3     |
| 17 | chr17_78178189  | 19 | chr19_53357378  | 5.128  | 10.39 | 0.001267 | CARD14    | ZNF468   |
| 12 | chr12_6562768   | 21 | chr21_36080162  | 0.1445 | 10.38 | 0.001272 | CLIC6     | TAPBP1   |
| 1  | chr1_8029505    | 17 | chr17_38173143  | 0.3224 | 10.37 | 0.001279 | CSF3      | PARK7    |
| 2  | chr2_102998279  | 12 | chr12_6623942   | 0.134  | 10.37 | 0.001283 | IL18R1    | NCAPD2   |
| 2  | chr2_102968211  | 12 | chr12_56437315  | 0.1209 | 10.35 | 0.001298 | IL1RL1    | RPS26    |
| 6  | chr6_111913262  | 12 | chr12_6495275   | 0.2497 | 10.34 | 0.0013   | LTBR      | TRAF3IP2 |
| 5  | chr5_131785546  | 11 | chr11_65601560  | 18.61  | 10.34 | 0.001302 | C5orf56   | SNX32    |
| 11 | chr11_65771097  | 12 | chr12_56733531  | 8.58   | 10.34 | 0.001303 | BANF1     | IL23A    |
| 1  | chr1_158987941  | 16 | chr16_31332719  | 0.2277 | 10.34 | 0.001304 | IFI16     | ITGAM    |
| 2  | chr2_163138986  | 17 | chr17_78178830  | 0.2773 | 10.33 | 0.001307 | CARD14    | IFIH1    |
| 2  | chr2_163138986  | 17 | chr17_78178182  | 3.856  | 10.32 | 0.001316 | CARD14    | IFIH1    |
| 2  | chr2_102957348  | 17 | chr17_38024626  | 0.841  | 10.31 | 0.001324 | IL1RL1    | ZBP2     |
| 2  | chr2_103125457  | 12 | chr12_10251227  | 3.816  | 10.29 | 0.001334 | CLEC1A    | SLC9A4   |
| 1  | chr1_158990412  | 12 | chr12_6619794   | 3.629  | 10.29 | 0.001335 | IFI16     | NCAPD2   |
| 2  | chr2_103125457  | 14 | chr14_35761791  | 0.2139 | 10.29 | 0.001339 | PSMA6     | SLC9A4   |
| 2  | chr2_102957348  | 17 | chr17_38029120  | 0.8443 | 10.28 | 0.001347 | IL1RL1    | ZBP2     |
| 2  | chr2_163137695  | 16 | chr16_31372344  | 8.724  | 10.28 | 0.001348 | IFIH1     | ITGAX    |
| 2  | chr2_102984624  | 18 | chr18_12978733  | 1.2    | 10.27 | 0.00135  | IL18R1    | SEH1L    |
| 12 | chr12_6604076   | 17 | chr17_38345233  | 4.403  | 10.26 | 0.001359 | NCAPD2    | RAPGEFL1 |
| 2  | chr2_163138986  | 17 | chr17_78178189  | 3.81   | 10.26 | 0.001359 | CARD14    | IFIH1    |
| 2  | chr2_102967928  | 20 | chr20_48599604  | 6.758  | 10.23 | 0.001384 | IL1RL1    | SNAI1    |
| 2  | chr2_61108996   | 7  | chr7_37251085   | 3.734  | 10.23 | 0.001385 | ELMO1     | REL      |
| 2  | chr2_103040177  | 19 | chr19_49671451  | 3.159  | 10.22 | 0.001388 | IL18RAP   | TRPM4    |
| 2  | chr2_62733253   | 12 | chr12_56427125  | 7.35   | 10.22 | 0.001388 | IKZF4     | TMEM17   |
| 1  | chr1_234563556  | 17 | chr17_73723532  | 2.687  | 10.22 | 0.00139  | ITGB4     | TARBP1   |
| 2  | chr2_162875478  | 17 | chr17_38153473  | 2.612  | 10.21 | 0.001397 | DPP4      | PSMD3    |
| 17 | chr17_40939982  | 20 | chr20_48522585  | 5.588  | 10.21 | 0.001398 | SPATA2    | WNK4     |
| 2  | chr2_102998279  | 12 | chr12_56437315  | 0.1249 | 10.2  | 0.001404 | IL18R1    | RPS26    |
| 2  | chr2_61128164   | 2  | chr2_62733253   | 0.3864 | 10.2  | 0.001406 | REL       | TMEM17   |
| 1  | chr1_158990412  | 12 | chr12_56398626  | 2.252  | 10.19 | 0.001411 | IFI16     | SUOX     |
| 5  | chr5_150496853  | 16 | chr16_31122571  | 1.448  | 10.19 | 0.001414 | ANXA6     | BCKDK    |
| 2  | chr2_61180244   | 5  | chr5_96222183   | 2.253  | 10.19 | 0.001415 | ERAP2     | PUS10    |
| 2  | chr2_102960007  | 10 | chr10_81058027  | 1.124  | 10.17 | 0.001427 | IL1RL1    | ZMIZ1    |
| 2  | chr2_102984624  | 12 | chr12_56482032  | 11.75  | 10.16 | 0.001438 | ERBB3     | IL18R1   |
| 2  | chr2_102984624  | 12 | chr12_56437315  | 0.1237 | 10.15 | 0.001441 | IL18R1    | RPS26    |
| 1  | chr1_67633930   | 5  | chr5_96121994   | 0.4392 | 10.13 | 0.001461 | ERAP1     | IL23R    |
| 4  | chr4_103594918  | 12 | chr12_56437315  | 0.2958 | 10.13 | 0.001462 | MANBA     | RPS26    |
| 1  | chr1_158986477  | 16 | chr16_31332719  | 0.2393 | 10.12 | 0.001465 | IFI16     | ITGAM    |
| 2  | chr2_102641201  | 4  | chr4_103557219  | 0.8917 | 10.12 | 0.001469 | IL1R2     | MANBA    |
| 18 | chr18_12984340  | 19 | chr19_49141336  | 6.474  | 10.11 | 0.001472 | SEC1P     | SEH1L    |
| 5  | chr5_158750013  | 18 | chr18_61649161  | 4.726  | 10.1  | 0.001479 | IL12B     | SERPINB8 |
| 12 | chr12_56676834  | 20 | chr20_48467560  | 0.2562 | 10.1  | 0.001481 | CS        | SLC9A8   |
| 1  | chr1_12249031   | 2  | chr2_61190024   | 0.1357 | 10.1  | 0.001482 | PUS10     | TNFRSF1B |
| 6  | chr6_312197     | 12 | chr12_111895203 | 5.895  | 10.1  | 0.001483 | ATXN2     | DUSP22   |
| 17 | chr17_26084532  | 17 | chr17_73519443  | 4.526  | 10.1  | 0.001484 | NOS2      | TSEN54   |
| 5  | chr5_131658092  | 10 | chr10_81058027  | 0.2472 | 10.09 | 0.001488 | LOC553103 | ZMIZ1    |
| 2  | chr2_103039873  | 12 | chr12_6623942   | 0.1208 | 10.09 | 0.001493 | IL18RAP   | NCAPD2   |
| 1  | chr1_207009910  | 2  | chr2_61118739   | 0.5539 | 10.09 | 0.001494 | IL19      | REL      |
| 12 | chr12_56604526  | 17 | chr17_78178830  | 0.3075 | 10.08 | 0.001501 | CARD14    | RNF41    |
| 1  | chr1_234573171  | 16 | chr16_11444716  | 0.8809 | 10.05 | 0.001522 | RMI2      | TARBP1   |
| 2  | chr2_103090127  | 10 | chr10_81060474  | 1.122  | 10.04 | 0.001528 | SLC9A4    | ZMIZ1    |
| 17 | chr17_38024626  | 19 | chr19_53357239  | 1.415  | 10.03 | 0.001541 | ZNF468    | ZBP2     |
| 10 | chr10_101934235 | 11 | chr11_9853777   | 0.7871 | 10.03 | 0.001542 | ERLIN1    | SBF2     |

|    |                 |    |                 |        |       |          |         |          |
|----|-----------------|----|-----------------|--------|-------|----------|---------|----------|
| 2  | chr2_102636285  | 14 | chr14_35761675  | 0.3753 | 10.02 | 0.001546 | IL1R2   | PSMA6    |
| 1  | chr1_152732436  | 1  | chr1_234573171  | 1.119  | 10    | 0.001561 | KPRP    | TARBP1   |
| 1  | chr1_152760075  | 4  | chr4_103516049  | 4.272  | 10    | 0.001562 | LCE1E   | NFKB1    |
| 20 | chr20_48461713  | 20 | chr20_48522585  | 3.443  | 9.993 | 0.001571 | SLC9A8  | SPATA2   |
| 1  | chr1_234573171  | 3  | chr3_102154071  | 4.472  | 9.984 | 0.001579 | TARBP1  | ZPLD1    |
| 1  | chr1_159002778  | 17 | chr17_38153711  | 4.826  | 9.981 | 0.001582 | IFI16   | PSMD3    |
| 4  | chr4_103537442  | 10 | chr10_75136022  | 0.1072 | 9.98  | 0.001582 | ANXA7   | NFKB1    |
| 1  | chr1_152759678  | 12 | chr12_6167131   | 2.314  | 9.979 | 0.001583 | LCE1E   | VWF      |
| 16 | chr16_11009267  | 17 | chr17_38024626  | 1.169  | 9.968 | 0.001593 | CIITA   | ZPBP2    |
| 2  | chr2_103011237  | 5  | chr5_132035036  | 4.187  | 9.966 | 0.001594 | IL18R1  | KIF3A    |
| 11 | chr11_65422853  | 16 | chr16_31095204  | 1.194  | 9.964 | 0.001596 | PRSS53  | RELA     |
| 2  | chr2_102967928  | 12 | chr12_56482032  | 11.5   | 9.959 | 0.001601 | ERBB3   | IL1RL1   |
| 17 | chr17_38031714  | 21 | chr21_35174730  | 2.993  | 9.947 | 0.001611 | ITSN1   | ZPBP2    |
| 5  | chr5_158750013  | 14 | chr14_64897018  | 1.499  | 9.943 | 0.001615 | IL12B   | MIR548AZ |
| 2  | chr2_102960007  | 17 | chr17_40459737  | 0.8941 | 9.92  | 0.001635 | IL1RL1  | STAT5A   |
| 2  | chr2_103040945  | 10 | chr10_81060474  | 1.12   | 9.918 | 0.001637 | IL18RAP | ZMZ1     |
| 2  | chr2_102955683  | 17 | chr17_40459737  | 0.8934 | 9.916 | 0.001639 | IL1RL1  | STAT5A   |
| 2  | chr2_103006448  | 17 | chr17_40272662  | 12.23  | 9.911 | 0.001643 | IL18R1  | KAT2A    |
| 5  | chr5_96339273   | 16 | chr16_31289401  | 3.917  | 9.904 | 0.001649 | ITGAM   | LNPEP    |
| 2  | chr2_102968356  | 12 | chr12_56482032  | 11.42  | 9.902 | 0.001651 | ERBB3   | IL1RL1   |
| 2  | chr2_102968007  | 12 | chr12_56482032  | 11.41  | 9.892 | 0.00166  | ERBB3   | IL1RL1   |
| 1  | chr1_7861197    | 1  | chr1_67889571   | 2.022  | 9.889 | 0.001662 | PER3    | SERBP1   |
| 1  | chr1_152760075  | 12 | chr12_6167131   | 2.473  | 9.888 | 0.001663 | LCE1E   | VWF      |
| 2  | chr2_61180244   | 5  | chr5_96232222   | 2.215  | 9.887 | 0.001664 | ERAP2   | PUS10    |
| 1  | chr1_207015917  | 12 | chr12_6626369   | 2.161  | 9.885 | 0.001667 | IL19    | NCAPD2   |
| 5  | chr5_150496924  | 16 | chr16_31122571  | 1.645  | 9.874 | 0.001677 | ANXA6   | BCKDK    |
| 2  | chr2_103095494  | 19 | chr19_10114795  | 4.614  | 9.868 | 0.001682 | COL5A3  | SLC9A4   |
| 2  | chr2_163138986  | 17 | chr17_78178170  | 0.2418 | 9.86  | 0.001689 | CARD14  | IFIH1    |
| 2  | chr2_103040945  | 4  | chr4_103561106  | 1.196  | 9.857 | 0.001691 | IL18RAP | MANBA    |
| 2  | chr2_103011237  | 17 | chr17_40272662  | 16.66  | 9.853 | 0.001695 | IL18R1  | KAT2A    |
| 9  | chr9_32630600   | 19 | chr19_53454387  | 4.126  | 9.844 | 0.001704 | TAF1L   | ZNF816   |
| 1  | chr1_234607086  | 12 | chr12_56744010  | 5.673  | 9.83  | 0.001717 | STAT2   | TARBP1   |
| 1  | chr1_152760075  | 12 | chr12_112479891 | 2.472  | 9.828 | 0.001718 | LCE1E   | NAA25    |
| 10 | chr10_75857010  | 17 | chr17_78180618  | 2.426  | 9.827 | 0.00172  | CARD14  | VCL      |
| 2  | chr2_62450631   | 3  | chr3_169485966  | 0.2675 | 9.82  | 0.001726 | ACTRT3  | B3GNT2   |
| 1  | chr1_11917786   | 1  | chr1_12249031   | 2.947  | 9.813 | 0.001733 | NPPB    | TNFRSF1B |
| 10 | chr10_101934036 | 19 | chr19_10464687  | 2.809  | 9.81  | 0.001735 | ERLIN1  | TYK2     |
| 2  | chr2_102968362  | 12 | chr12_56482032  | 11.29  | 9.81  | 0.001736 | ERBB3   | IL1RL1   |
| 2  | chr2_61128164   | 5  | chr5_96237114   | 2.771  | 9.809 | 0.001736 | ERAP2   | REL      |
| 13 | chr13_40293499  | 19 | chr19_10472933  | 0.155  | 9.807 | 0.001738 | COG6    | TYK2     |
| 12 | chr12_6636392   | 21 | chr21_36080162  | 0.1629 | 9.805 | 0.00174  | CLIC6   | NCAPD2   |
| 16 | chr16_10998482  | 16 | chr16_30936081  | 0.77   | 9.804 | 0.001741 | CIITA   | FBXL19   |
| 16 | chr16_11444716  | 17 | chr17_78117807  | 1.218  | 9.799 | 0.001746 | EIF4A3  | RMI2     |
| 2  | chr2_102968356  | 12 | chr12_56437315  | 0.1306 | 9.794 | 0.001751 | IL1RL1  | RPS26    |
| 1  | chr1_207013378  | 5  | chr5_96232222   | 5.412  | 9.791 | 0.001754 | ERAP2   | IL19     |
| 2  | chr2_62733253   | 19 | chr19_10813064  | 0.285  | 9.784 | 0.00176  | QTRT1   | TMEM17   |
| 12 | chr12_10562097  | 17 | chr17_38153473  | 0.237  | 9.783 | 0.001762 | KLRC4   | PSMD3    |
| 2  | chr2_103040177  | 17 | chr17_40272662  | 11.99  | 9.76  | 0.001783 | IL18RAP | KAT2A    |
| 1  | chr1_206646346  | 11 | chr11_65422853  | 7.403  | 9.759 | 0.001785 | IKBKE   | RELA     |
| 1  | chr1_158986477  | 6  | chr6_111912800  | 2.543  | 9.749 | 0.001794 | IFI16   | TRAF3IP2 |
| 2  | chr2_61190024   | 5  | chr5_96121069   | 8.19   | 9.749 | 0.001794 | ERAP1   | PUS10    |
| 1  | chr1_152760075  | 17 | chr17_26116762  | 0.3685 | 9.748 | 0.001795 | LCE1E   | NOS2     |
| 1  | chr1_67838353   | 5  | chr5_96222183   | 2.938  | 9.746 | 0.001797 | ERAP2   | IL12RB2  |
| 2  | chr2_61128164   | 5  | chr5_96232222   | 2.762  | 9.743 | 0.0018   | ERAP2   | REL      |
| 11 | chr11_65601560  | 20 | chr20_48467560  | 1.269  | 9.727 | 0.001816 | SLC9A8  | SNX32    |
| 1  | chr1_159002222  | 12 | chr12_56398626  | 2.231  | 9.724 | 0.001819 | IFI16   | SUOX     |
| 1  | chr1_206972442  | 5  | chr5_96129512   | 2.125  | 9.723 | 0.00182  | ERAP1   | IL19     |
| 2  | chr2_102968362  | 5  | chr5_132035036  | 3.787  | 9.722 | 0.001821 | IL1RL1  | KIF3A    |
| 1  | chr1_207013378  | 5  | chr5_96249323   | 6.303  | 9.716 | 0.001826 | ERAP2   | IL19     |
| 2  | chr2_103039873  | 11 | chr11_128354978 | 8.604  | 9.715 | 0.001828 | ETS1    | IL18RAP  |
| 5  | chr5_131785425  | 20 | chr20_48467560  | 11.95  | 9.714 | 0.001829 | C5orf56 | SLC9A8   |
| 2  | chr2_62450631   | 16 | chr16_11118724  | 0.3999 | 9.708 | 0.001835 | B3GNT2  | CLEC16A  |
| 1  | chr1_67155976   | 2  | chr2_102955683  | 0.1981 | 9.704 | 0.001839 | IL1RL1  | SGIP1    |
| 2  | chr2_103039873  | 17 | chr17_38024626  | 0.8472 | 9.699 | 0.001844 | IL18RAP | ZPBP2    |

|    |                 |    |                 |         |       |          |         |                       |
|----|-----------------|----|-----------------|---------|-------|----------|---------|-----------------------|
| 10 | chr10_81072398  | 18 | chr18_12979041  | 5.439   | 9.684 | 0.001859 | SEHIL   | ZMIZ1                 |
| 1  | chr1_159002222  | 17 | chr17_73515227  | 3.219   | 9.68  | 0.001863 | IFI16   | TSEN54                |
| 3  | chr3_121646806  | 5  | chr5_96119546   | 3.007   | 9.68  | 0.001863 | ERAP1   | SLC15A2               |
| 5  | chr5_150496853  | 16 | chr16_31095251  | 1.416   | 9.676 | 0.001867 | ANXA6   | PRSS53                |
| 2  | chr2_103006448  | 6  | chr6_111887624  | 0.34    | 9.672 | 0.001871 | IL18R1  | TRAF3IP2-AS1          |
| 12 | chr12_56604526  | 17 | chr17_78178182  | 3.177   | 9.67  | 0.001873 | CARD14  | RNF41                 |
| 12 | chr12_10562097  | 17 | chr17_38173143  | 0.2391  | 9.665 | 0.001878 | CSF3    | KLRC4                 |
| 1  | chr1_152732436  | 19 | chr19_10421269  | 10.09   | 9.659 | 0.001884 | FDX1L   | KPRP                  |
| 11 | chr11_65422853  | 16 | chr16_30938811  | 1.203   | 9.659 | 0.001884 | FBXL19  | RELA                  |
| 1  | chr1_158987941  | 20 | chr20_48461713  | 0.3471  | 9.657 | 0.001886 | IFI16   | SLC9A8                |
| 3  | chr3_121810428  | 5  | chr5_96118852   | 2.875   | 9.657 | 0.001887 | CD86    | ERAP1                 |
| 1  | chr1_172634903  | 2  | chr2_103125466  | 0.1816  | 9.653 | 0.001891 | FASLG   | SLC9A4                |
| 5  | chr5_96121069   | 16 | chr16_10989630  | 5.524   | 9.645 | 0.001899 | CIITA   | ERAP1                 |
| 1  | chr1_159023338  | 5  | chr5_96237114   | 3.338   | 9.641 | 0.001902 | ERAP2   | IFI16                 |
| 11 | chr11_65422853  | 16 | chr16_31095251  | 1.186   | 9.637 | 0.001906 | PRSS53  | RELA                  |
| 6  | chr6_138615085  | 10 | chr10_81058027  | 11.95   | 9.632 | 0.001912 | ARFGEF3 | ZMIZ1                 |
| 1  | chr1_234607104  | 12 | chr12_56744010  | 5.574   | 9.631 | 0.001914 | STAT2   | TARBP1                |
| 1  | chr1_8037969    | 2  | chr2_61108996   | 9.08    | 9.625 | 0.001919 | PARK7   | REL                   |
| 1  | chr1_159002778  | 17 | chr17_74169949  | 0.2239  | 9.62  | 0.001924 | IFI16   | RNF157                |
| 4  | chr4_103514445  | 12 | chr12_6483662   | 6.268   | 9.609 | 0.001937 | NFKB1   | SCNN1A                |
| 11 | chr11_9810776   | 19 | chr19_10464687  | 0.3542  | 9.607 | 0.001939 | SBF2    | TYK2                  |
| 2  | chr2_103040182  | 11 | chr11_128354978 | 8.511   | 9.602 | 0.001944 | ETS1    | IL18RAP               |
| 4  | chr4_103537442  | 11 | chr11_64543820  | 0.485   | 9.601 | 0.001944 | NFKB1   | SF1                   |
| 16 | chr16_10998482  | 17 | chr17_38031714  | 1.152   | 9.599 | 0.001947 | CIITA   | ZPBP2                 |
| 2  | chr2_163149965  | 12 | chr12_6131085   | 6.055   | 9.594 | 0.001953 | IFIH1   | VWF                   |
| 4  | chr4_103534560  | 10 | chr10_75136022  | 0.1179  | 9.593 | 0.001953 | ANXA7   | NFKB1                 |
| 2  | chr2_102957348  | 17 | chr17_38031714  | 0.847   | 9.585 | 0.001962 | IL1RL1  | ZPBP2                 |
| 12 | chr12_56384687  | 14 | chr14_35872926  | 1.547   | 9.584 | 0.001963 | NFKBIA  | RAB5B                 |
| 2  | chr2_163137683  | 17 | chr17_40716235  | 1.162   | 9.579 | 0.001968 | COASY   | IFIH1                 |
| 1  | chr1_206972442  | 5  | chr5_96124447   | 2.064   | 9.574 | 0.001974 | ERAP1   | IL19                  |
| 9  | chr9_32633431   | 10 | chr10_90034899  | 5.483   | 9.568 | 0.00198  | RNLS    | TAF1L                 |
| 4  | chr4_103594918  | 12 | chr12_6619794   | 3.264   | 9.56  | 0.001989 | MANBA   | NCAPD2                |
| 2  | chr2_103040177  | 18 | chr18_12978733  | 1.193   | 9.556 | 0.001992 | IL18RAP | SEHIL                 |
| 1  | chr1_152733376  | 17 | chr17_40481599  | 4.575   | 9.549 | 0.002001 | KPRP    | STAT3                 |
| 4  | chr4_103557219  | 6  | chr6_395246     | 2.309   | 9.544 | 0.002006 | IRF4    | MANBA                 |
| 1  | chr1_152785272  | 16 | chr16_10998482  | 11.79   | 9.541 | 0.00201  | CIITA   | LCE1B                 |
| 2  | chr2_102998279  | 19 | chr19_49671451  | 3.038   | 9.538 | 0.002013 | IL18R1  | TRPM4                 |
| 2  | chr2_102968007  | 12 | chr12_56437315  | 0.132   | 9.536 | 0.002015 | IL1RL1  | RPS26                 |
| 2  | chr2_102967928  | 5  | chr5_96116995   | 4.796   | 9.534 | 0.002017 | ERAP1   | IL1RL1                |
| 17 | chr17_38029120  | 17 | chr17_73888273  | 1.183   | 9.531 | 0.00202  | TRIM65  | ZPBP2                 |
| 5  | chr5_150496853  | 16 | chr16_31095204  | 1.419   | 9.528 | 0.002024 | ANXA6   | PRSS53                |
| 2  | chr2_103011237  | 19 | chr19_49671451  | 3.078   | 9.526 | 0.002026 | IL18R1  | TRPM4                 |
| 6  | chr6_405088     | 12 | chr12_6483463   | 2.566   | 9.526 | 0.002026 | IRF4    | SCNN1A                |
| 1  | chr1_159023338  | 5  | chr5_96232222   | 3.316   | 9.524 | 0.002028 | ERAP2   | IFI16                 |
| 2  | chr2_102968362  | 12 | chr12_56437315  | 0.1336  | 9.522 | 0.00203  | IL1RL1  | RPS26                 |
| 2  | chr2_102984671  | 12 | chr12_112471183 | 0.2522  | 9.519 | 0.002034 | IL18R1  | NAA25                 |
| 2  | chr2_61390140   | 12 | chr12_6861043   | 10.63   | 9.518 | 0.002035 | C2orf74 | MLF2                  |
| 1  | chr1_159002778  | 12 | chr12_6619794   | 3.452   | 9.504 | 0.00205  | IFI16   | NCAPD2                |
| 2  | chr2_102641201  | 2  | chr2_163137804  | 0.07348 | 9.492 | 0.002063 | IFIH1   | IL1R2                 |
| 12 | chr12_111895203 | 19 | chr19_49141336  | 8.498   | 9.48  | 0.002077 | ATXN2   | SEC1P                 |
| 4  | chr4_103557251  | 12 | chr12_6619794   | 3.634   | 9.48  | 0.002078 | MANBA   | NCAPD2                |
| 2  | chr2_103125457  | 20 | chr20_48439692  | 0.2579  | 9.475 | 0.002082 | SLC9A4  | SLC9A8                |
| 5  | chr5_150443005  | 19 | chr19_10461721  | 0.337   | 9.472 | 0.002086 | TNIP1   | TYK2                  |
| 1  | chr1_234563556  | 19 | chr19_53456074  | 0.1295  | 9.47  | 0.002089 | TARBP1  | ZNF816,ZNF816-ZNF321P |
| 12 | chr12_122720489 | 19 | chr19_10464687  | 3.285   | 9.469 | 0.002089 | TYK2    | VPS33A                |
| 1  | chr1_152760075  | 13 | chr13_40239296  | 0.1254  | 9.469 | 0.00209  | COG6    | LCE1E                 |
| 4  | chr4_103594938  | 16 | chr16_31332719  | 0.2415  | 9.466 | 0.002093 | ITGAM   | MANBA                 |
| 4  | chr4_103534560  | 19 | chr19_10090684  | 3.255   | 9.459 | 0.002101 | COL5A3  | NFKB1                 |
| 12 | chr12_56384687  | 14 | chr14_35872307  | 1.584   | 9.456 | 0.002104 | NFKBIA  | RAB5B                 |
| 17 | chr17_38031714  | 19 | chr19_53357239  | 1.394   | 9.452 | 0.00211  | ZNF468  | ZPBP2                 |
| 3  | chr3_121647656  | 19 | chr19_10104272  | 1.148   | 9.442 | 0.00212  | COL5A3  | SLC15A2               |
| 12 | chr12_6495275   | 12 | chr12_6636392   | 0.8118  | 9.434 | 0.002129 | LTBR    | NCAPD2                |
| 16 | chr16_31282433  | 17 | chr17_40716235  | 3.463   | 9.435 | 0.002129 | COASY   | ITGAM                 |
| 1  | chr1_234565787  | 3  | chr3_102154071  | 4.204   | 9.434 | 0.002131 | TARBP1  | ZPLD1                 |

|    |                |    |                |        |       |          |          |              |
|----|----------------|----|----------------|--------|-------|----------|----------|--------------|
| 12 | chr12_56384687 | 19 | chr19_10091356 | 11.05  | 9.433 | 0.002131 | COL5A3   | RAB5B        |
| 17 | chr17_78180618 | 19 | chr19_53357378 | 0.2245 | 9.432 | 0.002132 | CARD14   | ZNF468       |
| 17 | chr17_38079482 | 17 | chr17_38153473 | 0.3286 | 9.424 | 0.002142 | ORMDL3   | PSMD3        |
| 2  | chr2_103006448 | 5  | chr5_96116995  | 4.203  | 9.42  | 0.002146 | ERAP1    | IL18R1       |
| 1  | chr1_172633592 | 2  | chr2_102968007 | 2.865  | 9.415 | 0.002152 | FASLG    | IL1RL1       |
| 2  | chr2_62728105  | 19 | chr19_10812975 | 3.697  | 9.412 | 0.002156 | QTRT1    | TMEM17       |
| 19 | chr19_10104154 | 19 | chr19_10465304 | 4.807  | 9.411 | 0.002157 | COL5A3   | TYK2         |
| 3  | chr3_121810428 | 5  | chr5_96117300  | 2.983  | 9.41  | 0.002158 | CD86     | ERAP1        |
| 2  | chr2_102955683 | 17 | chr17_40854482 | 5.979  | 9.409 | 0.002159 | EZH1     | IL1RL1       |
| 5  | chr5_132035036 | 17 | chr17_78178182 | 2.702  | 9.409 | 0.002159 | CARD14   | KIF3A        |
| 5  | chr5_96125910  | 19 | chr19_10100047 | 2.609  | 9.406 | 0.002163 | COL5A3   | ERAP1        |
| 4  | chr4_103594918 | 16 | chr16_31332719 | 0.2418 | 9.401 | 0.002168 | ITGAM    | MANBA        |
| 4  | chr4_103518813 | 12 | chr12_6483851  | 4.067  | 9.399 | 0.002171 | NFKB1    | SCNNA1       |
| 13 | chr13_99966536 | 17 | chr17_26116896 | 2.273  | 9.397 | 0.002174 | MIR548AN | NOS2         |
| 2  | chr2_103125457 | 17 | chr17_40854650 | 4.073  | 9.395 | 0.002176 | EZH1     | SLC9A4       |
| 11 | chr11_65771097 | 12 | chr12_56740682 | 7.836  | 9.391 | 0.00218  | BANF1    | STAT2        |
| 12 | chr12_56384687 | 19 | chr19_10472933 | 1.112  | 9.382 | 0.002191 | RAB5B    | TYK2         |
| 16 | chr16_31272988 | 17 | chr17_78178170 | 0.364  | 9.379 | 0.002195 | CARD14   | ITGAM        |
| 17 | chr17_26084532 | 18 | chr18_12978823 | 6.037  | 9.375 | 0.0022   | NOS2     | SEH1L        |
| 16 | chr16_10996069 | 17 | chr17_38153473 | 4.267  | 9.371 | 0.002204 | CIITA    | PSMD3        |
| 4  | chr4_103527878 | 5  | chr5_96132795  | 0.3382 | 9.368 | 0.002208 | ERAP1    | NFKB1        |
| 18 | chr18_12979041 | 20 | chr20_48565754 | 7.148  | 9.367 | 0.002209 | RNF114   | SEH1L        |
| 12 | chr12_56490656 | 19 | chr19_10472933 | 0.2631 | 9.361 | 0.002216 | ERBB3    | TYK2         |
| 1  | chr1_152760075 | 1  | chr1_158549549 | 12.97  | 9.358 | 0.00222  | LCE1E    | OR10X1       |
| 5  | chr5_96124296  | 20 | chr20_48497565 | 0.1403 | 9.358 | 0.00222  | ERAP1    | SLC9A8       |
| 1  | chr1_152732251 | 14 | chr14_35761675 | 0.3534 | 9.357 | 0.002221 | KPRP     | PSMA6        |
| 1  | chr1_158990412 | 16 | chr16_31332719 | 0.2605 | 9.35  | 0.00223  | IFI16    | ITGAM        |
| 2  | chr2_102968356 | 5  | chr5_132035036 | 3.561  | 9.349 | 0.002231 | IL1RL1   | KIF3A        |
| 12 | chr12_10562097 | 17 | chr17_38153554 | 0.2463 | 9.348 | 0.002233 | KLRC4    | PSMD3        |
| 1  | chr1_159023338 | 5  | chr5_96249323  | 3.286  | 9.346 | 0.002235 | ERAP2    | IFI16        |
| 5  | chr5_96222183  | 5  | chr5_131726375 | 15.46  | 9.344 | 0.002237 | ERAP2    | SLC22A5      |
| 6  | chr6_111896798 | 20 | chr20_48599549 | 0.6348 | 9.338 | 0.002244 | SNAI1    | TRAF3IP2-AS1 |
| 1  | chr1_158986477 | 17 | chr17_38153711 | 4.101  | 9.334 | 0.002249 | IFI16    | PSMD3        |
| 1  | chr1_8029505   | 17 | chr17_38153554 | 0.3605 | 9.334 | 0.002249 | PARK7    | PSMD3        |
| 16 | chr16_11444716 | 16 | chr16_31288143 | 4.655  | 9.333 | 0.00225  | ITGAM    | RM12         |
| 1  | chr1_172633592 | 2  | chr2_102968362 | 2.866  | 9.332 | 0.002252 | FASLG    | IL1RL1       |
| 2  | chr2_102967928 | 18 | chr18_12978733 | 1.191  | 9.325 | 0.002261 | IL1RL1   | SEH1L        |
| 1  | chr1_152732436 | 12 | chr12_6167131  | 2.174  | 9.324 | 0.002262 | KPRP     | VWF          |
| 4  | chr4_103553090 | 6  | chr6_395246    | 0.4365 | 9.32  | 0.002266 | IRF4     | MANBA        |
| 9  | chr9_32633310  | 12 | chr12_56384687 | 0.1495 | 9.321 | 0.002266 | RAB5B    | TAF1L        |
| 1  | chr1_172633592 | 2  | chr2_102984624 | 2.848  | 9.311 | 0.002277 | FASLG    | IL18R1       |
| 11 | chr11_65771097 | 12 | chr12_56744276 | 7.77   | 9.303 | 0.002288 | BANF1    | STAT2        |
| 2  | chr2_102968211 | 4  | chr4_103514445 | 0.8764 | 9.301 | 0.00229  | IL1RL1   | NFKB1        |
| 2  | chr2_163137683 | 16 | chr16_31372344 | 7.824  | 9.297 | 0.002296 | IFIH1    | ITGAX        |
| 1  | chr1_234573171 | 16 | chr16_31309033 | 0.1142 | 9.292 | 0.002301 | ITGAM    | TARBP1       |
| 1  | chr1_158986225 | 6  | chr6_111912800 | 2.461  | 9.291 | 0.002303 | IFI16    | TRAF3IP2     |
| 2  | chr2_163139026 | 4  | chr4_103553090 | 7.741  | 9.289 | 0.002306 | IFIH1    | MANBA        |
| 12 | chr12_6500105  | 12 | chr12_6636392  | 0.8163 | 9.288 | 0.002307 | LTBR     | NCAPD2       |
| 11 | chr11_65422853 | 19 | chr19_10395776 | 0.2339 | 9.287 | 0.002308 | ICAM1    | RELA         |
| 9  | chr9_32632121  | 17 | chr17_78171944 | 0.1804 | 9.274 | 0.002324 | CARD14   | TAF1L        |
| 3  | chr3_101450832 | 19 | chr19_10475652 | 4.325  | 9.272 | 0.002327 | CEP97    | TYK2         |
| 2  | chr2_103039873 | 6  | chr6_111887624 | 0.3142 | 9.267 | 0.002333 | IL18RAP  | TRAF3IP2-AS1 |
| 12 | chr12_56604526 | 17 | chr17_78178170 | 0.3369 | 9.266 | 0.002334 | CARD14   | RNF41        |
| 1  | chr1_67795430  | 5  | chr5_150566792 | 0.1959 | 9.26  | 0.002342 | CCDC69   | IL12RB2      |
| 17 | chr17_78166385 | 22 | chr22_22143007 | 0.1413 | 9.259 | 0.002343 | CARD14   | MAPK1        |
| 2  | chr2_102998279 | 5  | chr5_132035036 | 3.753  | 9.257 | 0.002346 | IL18R1   | KIF3A        |
| 4  | chr4_103561106 | 10 | chr10_89475697 | 0.105  | 9.252 | 0.002352 | MANBA    | PAPSS2       |
| 14 | chr14_35871960 | 17 | chr17_40498461 | 0.33   | 9.251 | 0.002354 | NFKBIA   | STAT3        |
| 1  | chr1_234565787 | 11 | chr11_65793954 | 6.852  | 9.25  | 0.002355 | CATSPER1 | TARBP1       |
| 2  | chr2_61180244  | 5  | chr5_96222185  | 2.175  | 9.25  | 0.002355 | ERAP2    | PUS10        |
| 1  | chr1_67845536  | 2  | chr2_102984671 | 0.1876 | 9.244 | 0.002363 | IL12RB2  | IL18R1       |
| 12 | chr12_6562768  | 12 | chr12_56744445 | 1.498  | 9.24  | 0.002367 | STAT2    | TAPBPL       |
| 3  | chr3_121647656 | 5  | chr5_131796312 | 0.1371 | 9.239 | 0.002369 | C5orf56  | SLC15A2      |
| 1  | chr1_152759678 | 5  | chr5_150499016 | 2.736  | 9.236 | 0.002373 | ANXA6    | LCE1E        |

|    |                |    |                 |         |       |          |          |              |
|----|----------------|----|-----------------|---------|-------|----------|----------|--------------|
| 2  | chr2_103090127 | 5  | chr5_79374767   | 4.819   | 9.225 | 0.002387 | SLC9A4   | THBS4        |
| 1  | chr1_152732436 | 21 | chr21_35186297  | 3.208   | 9.223 | 0.00239  | ITSN1    | KPRP         |
| 1  | chr1_12252996  | 5  | chr5_150443005  | 0.4365  | 9.214 | 0.002401 | TNFRSF1B | TNIP1        |
| 1  | chr1_234584446 | 11 | chr11_65793954  | 4.598   | 9.215 | 0.002401 | CATSPER1 | TARBP1       |
| 5  | chr5_150496924 | 16 | chr16_31095251  | 1.605   | 9.212 | 0.002405 | ANXA6    | PRSS53       |
| 11 | chr11_9853777  | 16 | chr16_11051639  | 5.437   | 9.21  | 0.002408 | CLEC16A  | SBF2         |
| 1  | chr1_12249031  | 12 | chr12_6204841   | 0.3487  | 9.204 | 0.002415 | TNFRSF1B | VWF          |
| 2  | chr2_102998279 | 17 | chr17_40272662  | 11.15   | 9.199 | 0.002421 | IL18R1   | KAT2A        |
| 2  | chr2_103039873 | 17 | chr17_38029120  | 0.8539  | 9.197 | 0.002424 | IL18RAP  | ZPBP2        |
| 1  | chr1_24082393  | 4  | chr4_103561106  | 0.03215 | 9.179 | 0.002448 | MANBA    | TCEB3        |
| 18 | chr18_12984102 | 19 | chr19_10464687  | 2.682   | 9.177 | 0.002451 | SEH1L    | TYK2         |
| 2  | chr2_163139026 | 4  | chr4_103557219  | 0.1327  | 9.175 | 0.002454 | IFIH1    | MANBA        |
| 3  | chr3_101475968 | 5  | chr5_150443005  | 0.1831  | 9.173 | 0.002455 | CEP97    | TNIP1        |
| 6  | chr6_111913262 | 12 | chr12_6500105   | 0.2753  | 9.172 | 0.002458 | LTBR     | TRAF3IP2     |
| 17 | chr17_38029120 | 21 | chr21_35174730  | 2.742   | 9.167 | 0.002464 | ITSN1    | ZPBP2        |
| 2  | chr2_102968356 | 5  | chr5_96116995   | 4.471   | 9.163 | 0.002469 | ERAP1    | IL1RL1       |
| 2  | chr2_103125457 | 20 | chr20_48481366  | 3.014   | 9.163 | 0.002469 | SLC9A4   | SLC9A8       |
| 3  | chr3_121646806 | 5  | chr5_96121715   | 1.22    | 9.163 | 0.002469 | ERAP1    | SLC15A2      |
| 2  | chr2_102968007 | 5  | chr5_96116995   | 4.47    | 9.162 | 0.002471 | ERAP1    | IL1RL1       |
| 5  | chr5_96129512  | 10 | chr10_89469017  | 4.314   | 9.161 | 0.002472 | ERAP1    | PAPSS2       |
| 14 | chr14_35761675 | 17 | chr17_38062191  | 0.4464  | 9.154 | 0.002481 | GSDMB    | PSMA6        |
| 1  | chr1_67889571  | 12 | chr12_6924180   | 9.441   | 9.153 | 0.002482 | CD4      | SERBP1       |
| 11 | chr11_65771097 | 12 | chr12_56750204  | 7.63    | 9.154 | 0.002482 | BANF1    | STAT2        |
| 8  | chr8_3245242   | 17 | chr17_78178830  | 2.48    | 9.151 | 0.002485 | CARD14   | CSMD1        |
| 12 | chr12_6483463  | 17 | chr17_73723532  | 2.98    | 9.149 | 0.002488 | ITGB4    | SCNN1A       |
| 1  | chr1_158549408 | 19 | chr19_10464687  | 0.2055  | 9.147 | 0.002491 | OR10X1   | TYK2         |
| 10 | chr10_81058027 | 12 | chr12_6619284   | 0.8962  | 9.147 | 0.002491 | NCAPD2   | ZMIZ1        |
| 12 | chr12_6861043  | 12 | chr12_56524467  | 0.2914  | 9.141 | 0.0025   | ESYT1    | MLF2         |
| 5  | chr5_96237114  | 19 | chr19_10226273  | 2.947   | 9.133 | 0.002511 | EIF3G    | ERAP2        |
| 2  | chr2_61180244  | 5  | chr5_96249323   | 2.146   | 9.126 | 0.00252  | ERAP2    | PUS10        |
| 3  | chr3_122459366 | 5  | chr5_158750013  | 0.2559  | 9.123 | 0.002524 | HSPBAP1  | IL12B        |
| 2  | chr2_62728105  | 12 | chr12_111907989 | 4.418   | 9.122 | 0.002526 | ATXN2    | TMEM17       |
| 3  | chr3_121647656 | 17 | chr17_73539663  | 0.2912  | 9.121 | 0.002527 | LLGL2    | SLC15A2      |
| 2  | chr2_102968362 | 18 | chr18_12978733  | 1.188   | 9.12  | 0.002528 | IL1RL1   | SEH1L        |
| 2  | chr2_163137871 | 17 | chr17_40716235  | 1.156   | 9.12  | 0.002529 | COASY    | IFIH1        |
| 2  | chr2_103130373 | 17 | chr17_38063381  | 0.8441  | 9.116 | 0.002533 | GSDMB    | SLC9A4       |
| 5  | chr5_131825142 | 17 | chr17_78171944  | 2.654   | 9.117 | 0.002533 | CARD14   | IRF1         |
| 16 | chr16_31434735 | 17 | chr17_78171944  | 0.2184  | 9.116 | 0.002534 | CARD14   | ITGAD        |
| 2  | chr2_103040177 | 12 | chr12_56437315  | 0.14    | 9.113 | 0.002539 | IL18RAP  | RPS26        |
| 1  | chr1_152732436 | 16 | chr16_11141179  | 0.1854  | 9.111 | 0.002541 | CLEC16A  | KPRP         |
| 5  | chr5_96232222  | 19 | chr19_10226273  | 2.942   | 9.102 | 0.002553 | EIF3G    | ERAP2        |
| 2  | chr2_103011237 | 12 | chr12_56437315  | 0.1396  | 9.101 | 0.002555 | IL18R1   | RPS26        |
| 2  | chr2_163139026 | 4  | chr4_103594938  | 0.118   | 9.101 | 0.002555 | IFIH1    | MANBA        |
| 4  | chr4_103557251 | 10 | chr10_102239722 | 3.273   | 9.096 | 0.002561 | MANBA    | WNT8B        |
| 2  | chr2_102641201 | 4  | chr4_103557251  | 0.8964  | 9.095 | 0.002563 | IL1R2    | MANBA        |
| 1  | chr1_234607086 | 19 | chr19_10477193  | 7.533   | 9.093 | 0.002565 | TARBP1   | TYK2         |
| 5  | chr5_96238107  | 12 | chr12_6464809   | 30.48   | 9.091 | 0.002569 | ERAP2    | SCNN1A       |
| 1  | chr1_67793936  | 2  | chr2_102984671  | 0.1434  | 9.09  | 0.002571 | IL12RB2  | IL18R1       |
| 1  | chr1_152732436 | 12 | chr12_56524333  | 0.1825  | 9.086 | 0.002576 | ESYT1    | KPRP         |
| 1  | chr1_158990412 | 17 | chr17_74169949  | 0.2191  | 9.083 | 0.002579 | IFI16    | RNF157       |
| 1  | chr1_12252459  | 12 | chr12_6483851   | 11.84   | 9.083 | 0.002581 | SCNN1A   | TNFRSF1B     |
| 2  | chr2_103006448 | 6  | chr6_111922466  | 0.1773  | 9.079 | 0.002585 | IL18R1   | TRAF3IP2-AS1 |
| 1  | chr1_158990412 | 20 | chr20_48461713  | 0.349   | 9.078 | 0.002587 | IFI16    | SLC9A8       |
| 2  | chr2_62728046  | 3  | chr3_45187671   | 1.127   | 9.074 | 0.002592 | CDCP1    | TMEM17       |
| 1  | chr1_234563556 | 16 | chr16_11444716  | 0.8852  | 9.071 | 0.002596 | RMI2     | TARBP1       |
| 11 | chr11_64083300 | 12 | chr12_56384687  | 2.945   | 9.067 | 0.002602 | ESRRA    | RAB5B        |
| 2  | chr2_62728046  | 19 | chr19_10080537  | 2.423   | 9.067 | 0.002602 | COL5A3   | TMEM17       |
| 1  | chr1_7863219   | 11 | chr11_65422853  | 0.3545  | 9.066 | 0.002604 | PER3     | RELA         |
| 5  | chr5_96124296  | 19 | chr19_10096742  | 2.432   | 9.056 | 0.002618 | COL5A3   | ERAP1        |
| 1  | chr1_152760075 | 17 | chr17_40498461  | 0.6575  | 9.053 | 0.002623 | LCE1E    | STAT3        |
| 10 | chr10_90034899 | 12 | chr12_6140727   | 9.93    | 9.05  | 0.002627 | RNLS     | VWF          |
| 10 | chr10_90034899 | 16 | chr16_31332709  | 6.294   | 9.048 | 0.00263  | ITGAM    | RNLS         |
| 1  | chr1_67889571  | 2  | chr2_61190024   | 9.448   | 9.044 | 0.002636 | PUS10    | SERBP1       |
| 1  | chr1_67845536  | 2  | chr2_102960007  | 0.2026  | 9.041 | 0.00264  | IL12RB2  | IL1RL1       |



|    |                 |    |                 |        |       |          |         |              |
|----|-----------------|----|-----------------|--------|-------|----------|---------|--------------|
| 12 | chr12_56437315  | 17 | chr17_38029120  | 2.718  | 9.04  | 0.002641 | RPS26   | ZPBP2        |
| 12 | chr12_6861043   | 18 | chr18_51797788  | 2.902  | 9.039 | 0.002643 | MLF2    | POLI         |
| 17 | chr17_26110007  | 17 | chr17_78178830  | 0.2368 | 9.038 | 0.002644 | CARD14  | NOS2         |
| 5  | chr5_96225009   | 10 | chr10_81058027  | 9.937  | 9.033 | 0.002652 | ERAP2   | ZMIZ1        |
| 1  | chr1_67845536   | 2  | chr2_103125457  | 0.2477 | 9.031 | 0.002655 | IL12RB2 | SLC9A4       |
| 11 | chr11_9853777   | 19 | chr19_10363391  | 5.215  | 9.029 | 0.002658 | MRPL4   | SBF2         |
| 3  | chr3_45187671   | 11 | chr11_65423271  | 3.546  | 9.019 | 0.002672 | CDCP1   | RELA         |
| 4  | chr4_103488346  | 17 | chr17_78178830  | 0.296  | 9.016 | 0.002676 | CARD14  | NFKB1        |
| 12 | chr12_111992217 | 17 | chr17_38153473  | 4.461  | 9.015 | 0.002678 | ATXN2   | PSMD3        |
| 2  | chr2_103090127  | 11 | chr11_65372777  | 2.62   | 9.013 | 0.002681 | MAP3K11 | SLC9A4       |
| 2  | chr2_103125466  | 6  | chr6_138196059  | 0.4392 | 9.011 | 0.002683 | SLC9A4  | TNFAIP3      |
| 2  | chr2_163136771  | 17 | chr17_40467745  | 4.498  | 9.004 | 0.002693 | IFIH1   | STAT3        |
| 5  | chr5_79770655   | 12 | chr12_111895203 | 0.1803 | 9.004 | 0.002694 | ATXN2   | ZFYVE16      |
| 5  | chr5_96339273   | 11 | chr11_64083300  | 0.3661 | 9.004 | 0.002694 | ESRRA   | LNPEP        |
| 2  | chr2_62728105   | 12 | chr12_6562768   | 0.8592 | 8.997 | 0.002704 | TAPBPL  | TMEM17       |
| 1  | chr1_172633592  | 19 | chr19_49573245  | 5.207  | 8.994 | 0.002709 | FASLG   | KCNA7        |
| 13 | chr13_40256402  | 19 | chr19_10472933  | 3.652  | 8.988 | 0.002717 | COG6    | TYK2         |
| 2  | chr2_103125457  | 5  | chr5_158753736  | 4.07   | 8.989 | 0.002717 | IL12B   | SLC9A4       |
| 4  | chr4_103488346  | 17 | chr17_78178189  | 3.38   | 8.988 | 0.002717 | CARD14  | NFKB1        |
| 10 | chr10_101643750 | 20 | chr20_48524827  | 0.3649 | 8.988 | 0.002718 | DNMBP   | SPATA2       |
| 1  | chr1_67845536   | 2  | chr2_103125466  | 0.2427 | 8.981 | 0.002728 | IL12RB2 | SLC9A4       |
| 2  | chr2_62728046   | 12 | chr12_111907989 | 4.332  | 8.978 | 0.002733 | ATXN2   | TMEM17       |
| 2  | chr2_103040945  | 17 | chr17_73539671  | 5.605  | 8.976 | 0.002736 | IL18RAP | LLGL2        |
| 1  | chr1_152329369  | 5  | chr5_150282783  | 5.894  | 8.971 | 0.002743 | FLG2    | ZNF300       |
| 11 | chr11_65771097  | 17 | chr17_38063381  | 2.092  | 8.971 | 0.002743 | BANF1   | GSDMB        |
| 1  | chr1_152759678  | 12 | chr12_6483522   | 5.592  | 8.965 | 0.002752 | LCE1E   | SCNN1A       |
| 12 | chr12_6636311   | 21 | chr21_34876708  | 3.113  | 8.956 | 0.002766 | GART    | NCAPD2       |
| 2  | chr2_103039873  | 17 | chr17_38031714  | 0.8533 | 8.956 | 0.002766 | IL18RAP | ZPBP2        |
| 3  | chr3_45187671   | 6  | chr6_395014     | 0.4047 | 8.955 | 0.002767 | CDCP1   | IRF4         |
| 1  | chr1_172634903  | 2  | chr2_103125457  | 0.192  | 8.953 | 0.00277  | FASLG   | SLC9A4       |
| 1  | chr1_234565787  | 16 | chr16_11444716  | 0.8861 | 8.953 | 0.00277  | RMI2    | TARBP1       |
| 1  | chr1_67792496   | 5  | chr5_150443005  | 0.489  | 8.953 | 0.00277  | IL12RB2 | TNIP1        |
| 3  | chr3_121658343  | 5  | chr5_96339273   | 7.27   | 8.945 | 0.002782 | LNPEP   | SLC15A2      |
| 5  | chr5_158705065  | 19 | chr19_49671451  | 0.4097 | 8.945 | 0.002782 | TRPM4   | UBLCP1       |
| 12 | chr12_10251227  | 19 | chr19_10108850  | 0.2368 | 8.944 | 0.002784 | CLEC1A  | COL5A3       |
| 10 | chr10_81056383  | 11 | chr11_9803114   | 5.299  | 8.936 | 0.002796 | SBF2    | LOC100294362 |
| 1  | chr1_234546228  | 19 | chr19_10108861  | 0.1695 | 8.935 | 0.002798 | COL5A3  | TARBP1       |
| 17 | chr17_78180618  | 19 | chr19_49656468  | 5.122  | 8.935 | 0.002798 | CARD14  | HRC          |
| 1  | chr1_152760075  | 5  | chr5_150439952  | 0.1774 | 8.93  | 0.002805 | LCE1E   | TNIP1        |
| 1  | chr1_158987941  | 17 | chr17_78346595  | 0.2477 | 8.926 | 0.002812 | IFI16   | LOC100294362 |
| 5  | chr5_96124296   | 5  | chr5_131671585  | 0.2575 | 8.924 | 0.002815 | ERAP1   | SLC22A4      |
| 1  | chr1_172634903  | 2  | chr2_103040945  | 0.2113 | 8.922 | 0.002817 | FASLG   | IL18RAP      |
| 1  | chr1_172628650  | 20 | chr20_48599549  | 0.1789 | 8.921 | 0.002819 | FASLG   | SNAI1        |
| 2  | chr2_61180244   | 19 | chr19_10108861  | 2.666  | 8.921 | 0.002819 | COL5A3  | PUS10        |
| 5  | chr5_96121715   | 10 | chr10_80976056  | 5.567  | 8.92  | 0.002821 | ERAP1   | ZMIZ1        |
| 17 | chr17_38024626  | 17 | chr17_73888273  | 1.182  | 8.908 | 0.00284  | TRIM65  | ZPBP2        |
| 1  | chr1_172634903  | 2  | chr2_102955683  | 0.1949 | 8.906 | 0.002842 | FASLG   | IL1RL1       |
| 1  | chr1_172634869  | 12 | chr12_6604076   | 0.1439 | 8.905 | 0.002845 | FASLG   | NCAPD2       |
| 1  | chr1_158987941  | 17 | chr17_73515227  | 2.564  | 8.903 | 0.002847 | IFI16   | TSEN54       |
| 12 | chr12_111895203 | 19 | chr19_10104272  | 1.262  | 8.903 | 0.002847 | ATXN2   | COL5A3       |
| 4  | chr4_103553090  | 18 | chr18_61652376  | 3.148  | 8.901 | 0.00285  | MANBA   | SERPINB8     |
| 10 | chr10_81058027  | 11 | chr11_63974603  | 2.626  | 8.901 | 0.002851 | FERMT3  | ZMIZ1        |
| 10 | chr10_81060474  | 17 | chr17_26093670  | 0.3418 | 8.899 | 0.002854 | NOS2    | ZMIZ1        |
| 2  | chr2_102968211  | 5  | chr5_96116995   | 4.373  | 8.897 | 0.002857 | ERAP1   | IL1RL1       |
| 1  | chr1_67792496   | 19 | chr19_49447713  | 4.31   | 8.895 | 0.00286  | DHDH    | IL12RB2      |
| 1  | chr1_158986225  | 12 | chr12_6483851   | 1.177  | 8.894 | 0.002861 | IFI16   | SCNN1A       |
| 2  | chr2_103040177  | 6  | chr6_111922466  | 0.1799 | 8.892 | 0.002865 | IL18RAP | TRAF3IP2-AS1 |
| 2  | chr2_102968007  | 18 | chr18_12978733  | 1.186  | 8.889 | 0.002869 | IL1RL1  | SEH1L        |
| 2  | chr2_102997884  | 11 | chr11_128354978 | 8.012  | 8.886 | 0.002873 | ETS1    | IL18R1       |
| 5  | chr5_96125910   | 10 | chr10_75157049  | 7.918  | 8.884 | 0.002877 | ANXA7   | ERAP1        |
| 5  | chr5_132406025  | 19 | chr19_53454387  | 30.79  | 8.879 | 0.002885 | HSPA4   | ZNF816       |
| 6  | chr6_111912800  | 17 | chr17_78178830  | 0.3974 | 8.875 | 0.002891 | CARD14  | TRAF3IP2     |
| 10 | chr10_81060474  | 12 | chr12_111956155 | 0.1701 | 8.871 | 0.002897 | ATXN2   | ZMIZ1        |
| 1  | chr1_152276618  | 1  | chr1_234573171  | 11.81  | 8.869 | 0.002901 | FLG     | TARBP1       |

|    |                 |    |                 |         |       |          |         |         |
|----|-----------------|----|-----------------|---------|-------|----------|---------|---------|
| 5  | chr5_96121994   | 10 | chr10_89469017  | 4.164   | 8.862 | 0.002911 | ERAP1   | PAPSS2  |
| 1  | chr1_234565980  | 16 | chr16_11009267  | 0.2618  | 8.861 | 0.002913 | CIITA   | TARBP1  |
| 5  | chr5_132035036  | 17 | chr17_78178830  | 0.41    | 8.852 | 0.002927 | CARD14  | KIF3A   |
| 1  | chr1_234565787  | 19 | chr19_49230702  | 3.486   | 8.847 | 0.002935 | RASIP1  | TARBP1  |
| 2  | chr2_103125466  | 20 | chr20_48481366  | 2.957   | 8.847 | 0.002935 | SLC9A4  | SLC9A8  |
| 2  | chr2_103006387  | 20 | chr20_48497601  | 3.521   | 8.846 | 0.002938 | IL18R1  | SLC9A8  |
| 2  | chr2_62733253   | 21 | chr21_34926053  | 0.2964  | 8.844 | 0.002941 | SON     | TMEM17  |
| 2  | chr2_102855728  | 12 | chr12_6626369   | 0.2571  | 8.841 | 0.002945 | IL1RL2  | NCAPD2  |
| 1  | chr1_152329369  | 18 | chr18_12712943  | 0.3265  | 8.834 | 0.002957 | FLG2    | PSMG2   |
| 1  | chr1_158987941  | 5  | chr5_131726566  | 1.876   | 8.834 | 0.002957 | IFI16   | SLC22A5 |
| 3  | chr3_169492105  | 18 | chr18_12979041  | 0.1111  | 8.833 | 0.002958 | MYNN    | SEH1L   |
| 2  | chr2_102998279  | 5  | chr5_96116995   | 3.915   | 8.832 | 0.00296  | ERAP1   | IL18R1  |
| 5  | chr5_132037895  | 17 | chr17_78117807  | 28.01   | 8.83  | 0.002964 | EIF4A3  | KIF3A   |
| 16 | chr16_10998482  | 17 | chr17_78178170  | 0.8828  | 8.824 | 0.002972 | CARD14  | CIITA   |
| 2  | chr2_163149965  | 16 | chr16_31372344  | 7.377   | 8.823 | 0.002975 | IFIH1   | ITGAX   |
| 5  | chr5_96130758   | 16 | chr16_11009267  | 0.07714 | 8.819 | 0.002981 | CIITA   | ERAP1   |
| 12 | chr12_6636392   | 17 | chr17_40717317  | 0.1359  | 8.818 | 0.002983 | COASY   | NCAPD2  |
| 18 | chr18_12984340  | 19 | chr19_49206345  | 3.837   | 8.813 | 0.002991 | FUT2    | SEH1L   |
| 2  | chr2_102984624  | 5  | chr5_96116995   | 4.341   | 8.812 | 0.002992 | ERAP1   | IL18R1  |
| 13 | chr13_40293499  | 19 | chr19_10464687  | 0.1577  | 8.811 | 0.002995 | COG6    | TYK2    |
| 2  | chr2_103040945  | 12 | chr12_6619334   | 2.067   | 8.808 | 0.002999 | IL18RAP | NCAPD2  |
| 5  | chr5_158753736  | 12 | chr12_6861043   | 3.612   | 8.807 | 0.003001 | IL12B   | MLF2    |
| 5  | chr5_96249323   | 5  | chr5_131726375  | 14.52   | 8.806 | 0.003002 | ERAP2   | SLC22A5 |
| 17 | chr17_26116696  | 17 | chr17_73888354  | 0.3238  | 8.804 | 0.003005 | NOS2    | TRIM65  |
| 5  | chr5_96222183   | 16 | chr16_31272988  | 2.736   | 8.804 | 0.003006 | ERAP2   | ITGAM   |
| 12 | chr12_56384687  | 17 | chr17_26110007  | 0.164   | 8.802 | 0.003008 | NOS2    | RAB5B   |
| 3  | chr3_121647656  | 5  | chr5_96125910   | 1.111   | 8.793 | 0.003024 | ERAP1   | SLC15A2 |
| 2  | chr2_61108996   | 17 | chr17_40359286  | 0.4406  | 8.79  | 0.003028 | REL     | STAT5B  |
| 3  | chr3_121658343  | 5  | chr5_96232222   | 5.208   | 8.79  | 0.003028 | ERAP2   | SLC15A2 |
| 1  | chr1_67666600   | 21 | chr21_34876708  | 13.33   | 8.789 | 0.00303  | GART    | IL23R   |
| 12 | chr12_6861043   | 12 | chr12_56495532  | 0.272   | 8.789 | 0.00303  | ERBB3   | MLF2    |
| 11 | chr11_128359280 | 12 | chr12_6464809   | 3.835   | 8.788 | 0.003032 | ETS1    | SCNN1A  |
| 1  | chr1_152329369  | 17 | chr17_40716235  | 1.119   | 8.787 | 0.003034 | COASY   | FLG2    |
| 14 | chr14_35782244  | 19 | chr19_10104272  | 0.1518  | 8.787 | 0.003034 | COL5A3  | PSMA6   |
| 2  | chr2_103057895  | 12 | chr12_6626369   | 8.601   | 8.783 | 0.00304  | IL18RAP | NCAPD2  |
| 3  | chr3_121810528  | 17 | chr17_26116896  | 0.3749  | 8.781 | 0.003045 | CD86    | NOS2    |
| 10 | chr10_81060474  | 11 | chr11_63974603  | 2.572   | 8.778 | 0.003049 | FERMT3  | ZMIZ1   |
| 2  | chr2_103090127  | 17 | chr17_40481596  | 0.4678  | 8.778 | 0.003049 | SLC9A4  | STAT3   |
| 1  | chr1_8029505    | 17 | chr17_38153473  | 0.3646  | 8.776 | 0.003052 | PARK7   | PSMD3   |
| 5  | chr5_131785425  | 20 | chr20_48524827  | 7.328   | 8.775 | 0.003054 | C5orf56 | SPATA2  |
| 1  | chr1_152733376  | 11 | chr11_9853777   | 1.293   | 8.773 | 0.003058 | KPRP    | SBF2    |
| 12 | chr12_56384687  | 17 | chr17_40476847  | 0.3195  | 8.771 | 0.00306  | RAB5B   | STAT3   |
| 2  | chr2_102955683  | 20 | chr20_48431781  | 10.27   | 8.768 | 0.003066 | IL1RL1  | SLC9A8  |
| 3  | chr3_121646806  | 5  | chr5_131785536  | 2.007   | 8.768 | 0.003066 | C5orf56 | SLC15A2 |
| 1  | chr1_8029420    | 17 | chr17_78178170  | 0.1613  | 8.766 | 0.00307  | CARD14  | PARK7   |
| 14 | chr14_35761675  | 21 | chr21_34876641  | 2.433   | 8.76  | 0.00308  | GART    | PSMA6   |
| 2  | chr2_61128164   | 5  | chr5_96222185   | 2.6     | 8.756 | 0.003086 | ERAP2   | REL     |
| 5  | chr5_150566792  | 10 | chr10_75157049  | 7.086   | 8.754 | 0.003089 | ANXA7   | CCDC69  |
| 12 | chr12_6958601   | 12 | chr12_56384687  | 3.731   | 8.754 | 0.00309  | CDCA3   | RAB5B   |
| 2  | chr2_61175288   | 12 | chr12_6619284   | 3.416   | 8.753 | 0.003091 | NCAPD2  | PUS10   |
| 2  | chr2_102965372  | 17 | chr17_78178170  | 0.3662  | 8.75  | 0.003095 | CARD14  | IL1RL1  |
| 4  | chr4_103561106  | 10 | chr10_102116399 | 0.04501 | 8.749 | 0.003097 | MANBA   | SCD     |
| 1  | chr1_158986477  | 19 | chr19_10081322  | 1.471   | 8.747 | 0.003102 | COL5A3  | IFI16   |
| 17 | chr17_40498527  | 18 | chr18_12979041  | 14.22   | 8.746 | 0.003102 | SEH1L   | STAT3   |
| 2  | chr2_60695977   | 17 | chr17_38153554  | 3.744   | 8.746 | 0.003102 | BCL11A  | PSMD3   |
| 1  | chr1_67633930   | 5  | chr5_96129512   | 0.457   | 8.741 | 0.003111 | ERAP1   | IL23R   |
| 1  | chr1_152681689  | 5  | chr5_150411677  | 3.886   | 8.739 | 0.003115 | LCE4A   | TNIP1   |
| 1  | chr1_67889571   | 5  | chr5_79745499   | 0.3972  | 8.734 | 0.003123 | SERBP1  | ZFYVE16 |
| 4  | chr4_103561106  | 5  | chr5_150496853  | 0.7299  | 8.729 | 0.003132 | ANXA6   | MANBA   |
| 1  | chr1_234584446  | 3  | chr3_102154071  | 3.963   | 8.724 | 0.003141 | TARBP1  | ZPLD1   |
| 5  | chr5_96124447   | 10 | chr10_89469017  | 4.387   | 8.721 | 0.003145 | ERAP1   | PAPSS2  |
| 2  | chr2_61413665   | 12 | chr12_6483851   | 0.08704 | 8.72  | 0.003148 | AHSA2   | SCNN1A  |
| 9  | chr9_32629970   | 17 | chr17_40481529  | 0.4012  | 8.719 | 0.00315  | STAT3   | TAF1L   |
| 2  | chr2_103095494  | 19 | chr19_10097373  | 4.903   | 8.717 | 0.003152 | COL5A3  | SLC9A4  |

|    |                 |    |                 |         |       |          |           |              |
|----|-----------------|----|-----------------|---------|-------|----------|-----------|--------------|
| 1  | chr1_234607086  | 19 | chr19_10108850  | 1.236   | 8.716 | 0.003154 | COL5A3    | TARBP1       |
| 1  | chr1_206972365  | 2  | chr2_102968211  | 7.103   | 8.71  | 0.003164 | IL19      | IL1RL1       |
| 3  | chr3_101450832  | 19 | chr19_10472933  | 0.3183  | 8.708 | 0.003169 | CEP97     | TYK2         |
| 5  | chr5_96222496   | 20 | chr20_48467560  | 0.2464  | 8.707 | 0.00317  | ERAP2     | SLC9A8       |
| 1  | chr1_159023338  | 5  | chr5_96222183   | 3.169   | 8.705 | 0.003173 | ERAP2     | IFI16        |
| 4  | chr4_103537442  | 17 | chr17_76425289  | 5.192   | 8.705 | 0.003173 | DNAH17    | NFKB1        |
| 2  | chr2_103011237  | 5  | chr5_96116995   | 3.939   | 8.705 | 0.003174 | ERAP1     | IL18R1       |
| 2  | chr2_103136485  | 16 | chr16_30936081  | 7.708   | 8.7   | 0.003182 | FBXL19    | SLC9A4       |
| 5  | chr5_96124296   | 16 | chr16_31388246  | 4.631   | 8.7   | 0.003182 | ERAP1     | ITGAX        |
| 6  | chr6_312217     | 20 | chr20_48599549  | 2.252   | 8.699 | 0.003183 | DUSP22    | SNAI1        |
| 12 | chr12_6861043   | 12 | chr12_56527271  | 0.1891  | 8.697 | 0.003187 | ESYT1     | MLF2         |
| 2  | chr2_102984624  | 12 | chr12_6623942   | 0.1666  | 8.697 | 0.003188 | IL18R1    | NCAPD2       |
| 10 | chr10_90034899  | 11 | chr11_9806817   | 2.901   | 8.696 | 0.00319  | RNLS      | SBF2         |
| 2  | chr2_103125466  | 12 | chr12_10251227  | 3.41    | 8.695 | 0.00319  | CLEC1A    | SLC9A4       |
| 5  | chr5_96339273   | 19 | chr19_49399711  | 0.1593  | 8.693 | 0.003195 | LNPEP     | TULP2        |
| 2  | chr2_61308675   | 10 | chr10_101934235 | 11.17   | 8.69  | 0.0032   | ERLIN1    | KIAA1841     |
| 14 | chr14_35871960  | 20 | chr20_48467560  | 0.7187  | 8.683 | 0.003212 | NFKBIA    | SLC9A8       |
| 1  | chr1_7910969    | 1  | chr1_12249031   | 0.2226  | 8.68  | 0.003216 | TNFRSF1B  | UTS2         |
| 17 | chr17_38031714  | 17 | chr17_73888273  | 1.179   | 8.68  | 0.003217 | TRIM65    | ZBPB2        |
| 5  | chr5_96139250   | 12 | chr12_6635360   | 3.131   | 8.677 | 0.003222 | ERAP1     | NCAPD2       |
| 5  | chr5_96513471   | 6  | chr6_111922466  | 0.3561  | 8.669 | 0.003237 | RIOK2     | TRAF3IP2-AS1 |
| 16 | chr16_31282433  | 17 | chr17_40459737  | 3.083   | 8.662 | 0.00325  | ITGAM     | STAT5A       |
| 5  | chr5_132036449  | 17 | chr17_78180618  | 0.1496  | 8.657 | 0.003258 | CARD14    | KIF3A        |
| 5  | chr5_96139250   | 10 | chr10_80976056  | 4.679   | 8.655 | 0.003261 | ERAP1     | ZMIZ1        |
| 2  | chr2_103063520  | 4  | chr4_103514445  | 0.7372  | 8.651 | 0.003268 | IL18RAP   | NFKB1        |
| 1  | chr1_234607086  | 17 | chr17_78117807  | 0.7386  | 8.648 | 0.003274 | EIF4A3    | TARBP1       |
| 1  | chr1_158986225  | 6  | chr6_138198320  | 0.2061  | 8.647 | 0.003276 | IFI16     | TNFAIP3      |
| 12 | chr12_122720489 | 19 | chr19_10472933  | 2.963   | 8.643 | 0.003284 | TYK2      | VPS33A       |
| 2  | chr2_103040945  | 12 | chr12_56526164  | 0.242   | 8.643 | 0.003284 | ESYT1     | IL18RAP      |
| 2  | chr2_103057723  | 5  | chr5_96513471   | 0.2392  | 8.642 | 0.003284 | IL18RAP   | RIOK2        |
| 2  | chr2_102968007  | 4  | chr4_103514445  | 0.8834  | 8.637 | 0.003294 | IL1RL1    | NFKB1        |
| 2  | chr2_103039873  | 12 | chr12_56437315  | 0.04604 | 8.635 | 0.003298 | IL18RAP   | RPS26        |
| 2  | chr2_103040177  | 3  | chr3_45187671   | 1.16    | 8.634 | 0.0033   | CDCP1     | IL18RAP      |
| 1  | chr1_152681578  | 19 | chr19_49206631  | 8.601   | 8.63  | 0.003306 | FUT2      | LCE4A        |
| 5  | chr5_132035036  | 17 | chr17_78178170  | 0.3932  | 8.63  | 0.003306 | CARD14    | KIF3A        |
| 2  | chr2_103125466  | 14 | chr14_35761791  | 0.2285  | 8.626 | 0.003314 | PSMA6     | SLC9A4       |
| 10 | chr10_81060474  | 19 | chr19_49206631  | 1.106   | 8.623 | 0.003319 | FUT2      | ZMIZ1        |
| 5  | chr5_96222185   | 6  | chr6_138539306  | 2.458   | 8.613 | 0.003337 | ERAP2     | PBOV1        |
| 1  | chr1_207009910  | 11 | chr11_65372863  | 0.2713  | 8.61  | 0.003343 | IL19      | MAP3K11      |
| 16 | chr16_10992745  | 19 | chr19_10108861  | 0.1366  | 8.607 | 0.00335  | CIITA     | COL5A3       |
| 16 | chr16_10996069  | 17 | chr17_38173143  | 4.224   | 8.604 | 0.003355 | CIITA     | CSF3         |
| 2  | chr2_102965372  | 17 | chr17_78178182  | 2.597   | 8.59  | 0.003379 | CARD14    | IL1RL1       |
| 5  | chr5_96121715   | 17 | chr17_40721559  | 0.06034 | 8.583 | 0.003393 | ERAP1     | MLX          |
| 1  | chr1_172634869  | 12 | chr12_6619284   | 0.1464  | 8.581 | 0.003397 | FASLG     | NCAPD2       |
| 4  | chr4_103537442  | 17 | chr17_78093367  | 0.483   | 8.579 | 0.0034   | GAA       | NFKB1        |
| 1  | chr1_234607104  | 19 | chr19_10477193  | 7.104   | 8.578 | 0.003403 | TARBP1    | TYK2         |
| 17 | chr17_73888354  | 19 | chr19_10100192  | 9.945   | 8.574 | 0.003411 | COL5A3    | TRIM65       |
| 7  | chr7_36927199   | 16 | chr16_11444716  | 13.1    | 8.573 | 0.003412 | ELMO1     | RMI2         |
| 2  | chr2_103125466  | 12 | chr12_56481493  | 12.96   | 8.572 | 0.003415 | ERBB3     | SLC9A4       |
| 1  | chr1_152732251  | 14 | chr14_35761592  | 10.46   | 8.571 | 0.003416 | KPRP      | PSMA6        |
| 2  | chr2_61128164   | 5  | chr5_96222183   | 2.522   | 8.571 | 0.003416 | ERAP2     | REL          |
| 2  | chr2_103006387  | 12 | chr12_6619334   | 2.022   | 8.569 | 0.003419 | IL18R1    | NCAPD2       |
| 5  | chr5_96118852   | 16 | chr16_31339529  | 0.277   | 8.569 | 0.00342  | ERAP1     | ITGAM        |
| 5  | chr5_96232222   | 5  | chr5_131726375  | 14.23   | 8.568 | 0.003421 | ERAP2     | SLC22A5      |
| 1  | chr1_7912870    | 19 | chr19_49206631  | 0.793   | 8.568 | 0.003422 | FUT2      | UTS2         |
| 5  | chr5_131670658  | 17 | chr17_26084532  | 0.2366  | 8.567 | 0.003424 | LOC553103 | NOS2         |
| 2  | chr2_102967928  | 12 | chr12_56437315  | 0.149   | 8.563 | 0.003431 | IL1RL1    | RPS26        |
| 5  | chr5_96513471   | 5  | chr5_131822665  | 0.2243  | 8.562 | 0.003433 | IRF1      | RIOK2        |
| 5  | chr5_96509055   | 20 | chr20_48522414  | 2.289   | 8.561 | 0.003434 | RIOK2     | SPATA2       |
| 4  | chr4_103514445  | 19 | chr19_49230664  | 2.452   | 8.559 | 0.003439 | NFKB1     | RASIP1       |
| 7  | chr7_37136346   | 19 | chr19_10464687  | 0.1169  | 8.556 | 0.003443 | ELMO1     | TYK2         |
| 2  | chr2_102957348  | 12 | chr12_56437315  | 0.0466  | 8.555 | 0.003446 | IL1RL1    | RPS26        |
| 2  | chr2_103090127  | 12 | chr12_56526164  | 0.2392  | 8.554 | 0.003448 | ESYT1     | SLC9A4       |
| 2  | chr2_62728046   | 17 | chr17_38079482  | 2.844   | 8.553 | 0.003449 | ORMDL3    | TMEM17       |

|    |                |    |                 |         |       |          |              |              |
|----|----------------|----|-----------------|---------|-------|----------|--------------|--------------|
| 2  | chr2_102984671 | 16 | chr16_31332628  | 0.3584  | 8.55  | 0.003456 | IL18R1       | ITGAM        |
| 9  | chr9_32629970  | 19 | chr19_49206631  | 2.329   | 8.55  | 0.003456 | FUT2         | TAF1L        |
| 11 | chr11_65422853 | 12 | chr12_56819144  | 9.548   | 8.549 | 0.003457 | RELA         | TIMELESS     |
| 1  | chr1_12249031  | 2  | chr2_102805692  | 0.1086  | 8.547 | 0.003461 | IL1RL2       | TNFRSF1B     |
| 1  | chr1_152283119 | 2  | chr2_102960007  | 5.138   | 8.547 | 0.003461 | FLG          | IL1RL1       |
| 7  | chr7_37251085  | 17 | chr17_78178830  | 0.5016  | 8.54  | 0.003474 | CARD14       | ELMO1        |
| 1  | chr1_234573171 | 11 | chr11_65793954  | 5.077   | 8.539 | 0.003475 | CATSPER1     | TARBP1       |
| 12 | chr12_6167131  | 12 | chr12_6636392   | 2.975   | 8.535 | 0.003484 | NCAPD2       | VWF          |
| 1  | chr1_152681717 | 1  | chr1_159002222  | 0.5432  | 8.535 | 0.003485 | IFI16        | LCE4A        |
| 1  | chr1_234573171 | 19 | chr19_49230702  | 3.287   | 8.532 | 0.003489 | RASIP1       | TARBP1       |
| 1  | chr1_158987941 | 5  | chr5_150497409  | 0.2178  | 8.531 | 0.003491 | ANXA6        | IFI16        |
| 2  | chr2_102984624 | 20 | chr20_48599604  | 4.681   | 8.531 | 0.003491 | IL18R1       | SNAI1        |
| 5  | chr5_96222185  | 5  | chr5_131726375  | 13.89   | 8.526 | 0.0035   | ERAP2        | SLC22A5      |
| 2  | chr2_103125466 | 12 | chr12_111951360 | 0.3008  | 8.525 | 0.003503 | ATXN2        | SLC9A4       |
| 5  | chr5_96121715  | 19 | chr19_10444602  | 3.019   | 8.524 | 0.003505 | ERAP1        | ICAM3        |
| 2  | chr2_103040182 | 17 | chr17_38024626  | 0.8526  | 8.523 | 0.003507 | IL18RAP      | ZPBP2        |
| 16 | chr16_10998482 | 17 | chr17_38029120  | 1.14    | 8.523 | 0.003508 | CIITA        | ZPBP2        |
| 1  | chr1_234584446 | 16 | chr16_31309033  | 0.1269  | 8.522 | 0.003509 | ITGAM        | TARBP1       |
| 3  | chr3_45187671  | 4  | chr4_103500090  | 11.78   | 8.516 | 0.00352  | CDCP1        | NFKB1        |
| 2  | chr2_163137695 | 16 | chr16_11003052  | 6.485   | 8.516 | 0.003521 | CIITA        | IFIH1        |
| 12 | chr12_6562768  | 20 | chr20_48565700  | 0.169   | 8.515 | 0.003522 | RNF114       | TAPBP1       |
| 2  | chr2_102997884 | 12 | chr12_56437315  | 0.04666 | 8.511 | 0.00353  | IL18R1       | RPS26        |
| 5  | chr5_158750013 | 21 | chr21_36079802  | 2.169   | 8.51  | 0.003532 | CLIC6        | IL12B        |
| 6  | chr6_111912800 | 17 | chr17_78178170  | 0.4097  | 8.51  | 0.003533 | CARD14       | TRAF3IP2     |
| 2  | chr2_102998279 | 3  | chr3_169500454  | 2.855   | 8.505 | 0.003542 | IL18R1       | MYNN         |
| 2  | chr2_103006387 | 5  | chr5_150497409  | 0.1572  | 8.503 | 0.003546 | ANXA6        | IL18R1       |
| 10 | chr10_81058027 | 11 | chr11_9850990   | 0.3402  | 8.501 | 0.003549 | SBF2         | ZMZ1         |
| 5  | chr5_150566792 | 16 | chr16_11363025  | 2.631   | 8.496 | 0.003558 | CCDC69       | TNP2         |
| 5  | chr5_158705065 | 11 | chr11_128359280 | 0.4666  | 8.496 | 0.003559 | ETS1         | UBLCP1       |
| 1  | chr1_206239427 | 18 | chr18_12979041  | 7.884   | 8.495 | 0.003562 | C1orf186     | SEH1L        |
| 4  | chr4_103561106 | 11 | chr11_64543820  | 0.3015  | 8.488 | 0.003576 | MANBA        | SF1          |
| 1  | chr1_234573171 | 5  | chr5_150518177  | 0.3752  | 8.486 | 0.003578 | ANXA6        | TARBP1       |
| 2  | chr2_103057723 | 5  | chr5_96509055   | 0.2207  | 8.486 | 0.003579 | IL18RAP      | RIOK2        |
| 2  | chr2_103125457 | 6  | chr6_138196059  | 0.4444  | 8.486 | 0.003579 | SLC9A4       | TNFAIP3      |
| 16 | chr16_31272988 | 17 | chr17_78178830  | 0.3904  | 8.481 | 0.003588 | CARD14       | ITGAM        |
| 4  | chr4_103537442 | 17 | chr17_40490762  | 0.177   | 8.478 | 0.003594 | NFKB1        | STAT3        |
| 2  | chr2_163136727 | 16 | chr16_11003052  | 6.457   | 8.477 | 0.003597 | CIITA        | IFIH1        |
| 1  | chr1_158986225 | 16 | chr16_31332628  | 0.346   | 8.475 | 0.0036   | IFI16        | ITGAM        |
| 4  | chr4_103488349 | 17 | chr17_38153473  | 0.1849  | 8.475 | 0.0036   | NFKB1        | PSMD3        |
| 5  | chr5_131785425 | 20 | chr20_48522585  | 7.268   | 8.475 | 0.003601 | C5orf56      | SPATA2       |
| 2  | chr2_103125457 | 2  | chr2_163149965  | 0.8579  | 8.474 | 0.003602 | IFIH1        | SLC9A4       |
| 17 | chr17_40498527 | 18 | chr18_12978733  | 13.67   | 8.472 | 0.003606 | SEH1L        | STAT3        |
| 2  | chr2_163137871 | 16 | chr16_11003052  | 6.446   | 8.462 | 0.003627 | CIITA        | IFIH1        |
| 1  | chr1_152276618 | 1  | chr1_234565787  | 8.141   | 8.46  | 0.003631 | FLG          | TARBP1       |
| 10 | chr10_81058027 | 12 | chr12_111956155 | 0.1835  | 8.458 | 0.003634 | ATXN2        | ZMZ1         |
| 5  | chr5_79374668  | 12 | chr12_6483463   | 3.042   | 8.458 | 0.003634 | CTD-220118.1 | SCNN1A       |
| 2  | chr2_103130373 | 5  | chr5_96116995   | 4.832   | 8.455 | 0.003641 | ERAP1        | SLC9A4       |
| 1  | chr1_12249031  | 17 | chr17_38079482  | 3.499   | 8.453 | 0.003644 | ORMDL3       | TNFRSF1B     |
| 5  | chr5_158750013 | 17 | chr17_73759611  | 0.367   | 8.451 | 0.003648 | GALK1        | IL12B        |
| 3  | chr3_121643931 | 5  | chr5_96222183   | 2.36    | 8.448 | 0.003655 | ERAP2        | SLC15A2      |
| 1  | chr1_67155976  | 2  | chr2_102984671  | 0.2156  | 8.447 | 0.003656 | IL18R1       | SGIP1        |
| 10 | chr10_80975959 | 19 | chr19_10108850  | 0.09494 | 8.447 | 0.003656 | COL5A3       | ZMZ1         |
| 3  | chr3_101571779 | 5  | chr5_150566792  | 9.215   | 8.446 | 0.003658 | CCDC69       | NFKBIZ       |
| 2  | chr2_163149896 | 6  | chr6_111884277  | 2.975   | 8.439 | 0.003672 | IFIH1        | TRAF3IP2-AS1 |
| 3  | chr3_121647656 | 5  | chr5_158747359  | 3.506   | 8.431 | 0.003688 | IL12B        | SLC15A2      |
| 11 | chr11_9802078  | 19 | chr19_10472933  | 3.921   | 8.43  | 0.003691 | SBF2-AS1     | TYK2         |
| 6  | chr6_138192761 | 19 | chr19_49230664  | 7.48    | 8.429 | 0.003693 | RASIP1       | TNFAIP3      |
| 2  | chr2_62728105  | 19 | chr19_10813064  | 0.29    | 8.428 | 0.003695 | QTRT1        | TMEM17       |
| 1  | chr1_206972442 | 5  | chr5_96121994   | 1.933   | 8.427 | 0.003697 | ERAP1        | IL19         |
| 1  | chr1_152770589 | 12 | chr12_6167131   | 2.179   | 8.421 | 0.003709 | LCE1D        | VWF          |
| 12 | chr12_56437315 | 17 | chr17_38024626  | 2.649   | 8.418 | 0.003716 | RPS26        | ZPBP2        |
| 17 | chr17_78178830 | 19 | chr19_10812818  | 5.676   | 8.415 | 0.003722 | CARD14       | QTRT1        |
| 17 | chr17_26125933 | 17 | chr17_40459737  | 0.2805  | 8.414 | 0.003724 | NOS2         | STAT5A       |
| 9  | chr9_32631356  | 16 | chr16_11444716  | 0.1399  | 8.414 | 0.003724 | RMI2         | TAF1L        |

|    |                 |    |                 |         |       |          |           |              |
|----|-----------------|----|-----------------|---------|-------|----------|-----------|--------------|
| 1  | chr1_159002778  | 12 | chr12_122720095 | 1.503   | 8.413 | 0.003725 | IFI16     | VPS33A       |
| 12 | chr12_111895203 | 19 | chr19_10104154  | 1.269   | 8.413 | 0.003725 | ATXN2     | COL5A3       |
| 2  | chr2_103040182  | 19 | chr19_10114795  | 4.247   | 8.413 | 0.003726 | COL5A3    | IL18RAP      |
| 1  | chr1_152329369  | 4  | chr4_103459060  | 0.1704  | 8.41  | 0.003732 | FLG2      | NFKB1        |
| 2  | chr2_102849537  | 5  | chr5_158705065  | 0.1411  | 8.409 | 0.003734 | IL1RL2    | UBLCP1       |
| 3  | chr3_101576169  | 21 | chr21_34876708  | 0.4165  | 8.408 | 0.003736 | GART      | NFKBIZ       |
| 5  | chr5_96252998   | 10 | chr10_75564556  | 4.419   | 8.407 | 0.003739 | ERAP2     | NDST2        |
| 2  | chr2_61108996   | 5  | chr5_96139493   | 6.42    | 8.405 | 0.003741 | ERAP1     | REL          |
| 5  | chr5_132406025  | 18 | chr18_12978733  | 9.096   | 8.404 | 0.003744 | HSPA4     | SEH1L        |
| 6  | chr6_111913238  | 17 | chr17_38063381  | 0.3117  | 8.404 | 0.003745 | GSDMB     | TRAF3IP2     |
| 4  | chr4_103488349  | 17 | chr17_38153554  | 0.1863  | 8.403 | 0.003747 | NFKB1     | PSMD3        |
| 18 | chr18_12978733  | 20 | chr20_48565754  | 6.129   | 8.401 | 0.00375  | RNF114    | SEH1L        |
| 10 | chr10_81058027  | 16 | chr16_31095204  | 0.8375  | 8.399 | 0.003754 | PRSS53    | ZMIZ1        |
| 1  | chr1_12387829   | 1  | chr1_158986225  | 0.04556 | 8.395 | 0.003763 | IFI16     | VPS13D       |
| 16 | chr16_10998482  | 17 | chr17_38063381  | 1.142   | 8.394 | 0.003764 | CIITA     | GSDMB        |
| 2  | chr2_62728105   | 17 | chr17_38079482  | 2.828   | 8.394 | 0.003765 | ORMDL3    | TMEM17       |
| 1  | chr1_152733376  | 19 | chr19_49422277  | 3.965   | 8.392 | 0.00377  | KPRP      | NUCB1        |
| 12 | chr12_6483463   | 17 | chr17_40483574  | 5.545   | 8.387 | 0.003779 | SCNN1A    | STAT3        |
| 1  | chr1_158990412  | 2  | chr2_102984671  | 0.9065  | 8.386 | 0.003781 | IFI16     | IL18R1       |
| 10 | chr10_101934235 | 12 | chr12_6636392   | 0.7617  | 8.385 | 0.003783 | ERLIN1    | NCAPD2       |
| 2  | chr2_102997884  | 12 | chr12_6623942   | 0.1562  | 8.384 | 0.003785 | IL18R1    | NCAPD2       |
| 5  | chr5_96139250   | 19 | chr19_49227758  | 5.074   | 8.379 | 0.003796 | ERAP1     | RASIP1       |
| 2  | chr2_62728105   | 5  | chr5_131647989  | 3.022   | 8.377 | 0.003799 | LOC553103 | TMEM17       |
| 4  | chr4_103488349  | 17 | chr17_38173143  | 0.1887  | 8.377 | 0.003799 | CSF3      | NFKB1        |
| 1  | chr1_152770521  | 16 | chr16_31485786  | 0.2418  | 8.376 | 0.003802 | LCE1D     | TGFB1I1      |
| 5  | chr5_96121994   | 10 | chr10_80976056  | 4.643   | 8.373 | 0.003809 | ERAP1     | ZMIZ1        |
| 13 | chr13_45601699  | 19 | chr19_10114033  | 0.2804  | 8.369 | 0.003817 | COL5A3    | GPALPP1      |
| 2  | chr2_103057895  | 12 | chr12_6604076   | 7.783   | 8.368 | 0.003819 | IL18RAP   | NCAPD2       |
| 1  | chr1_152770521  | 2  | chr2_103121779  | 0.406   | 8.366 | 0.003824 | LCE1D     | SLC9A4       |
| 16 | chr16_31332845  | 19 | chr19_10108850  | 3.672   | 8.363 | 0.003829 | COL5A3    | ITGAM        |
| 2  | chr2_102968362  | 8  | chr8_3205697    | 0.2425  | 8.363 | 0.00383  | CSMD1     | IL1RL1       |
| 1  | chr1_67666600   | 4  | chr4_103557251  | 0.1126  | 8.361 | 0.003833 | IL23R     | MANBA        |
| 6  | chr6_111887624  | 18 | chr18_12979041  | 2.364   | 8.361 | 0.003833 | SEH1L     | TRAF3IP2-AS1 |
| 1  | chr1_152770589  | 4  | chr4_103537729  | 0.1932  | 8.357 | 0.003841 | LCE1D     | NFKB1        |
| 1  | chr1_7890174    | 11 | chr11_65422853  | 0.1198  | 8.355 | 0.003846 | PER3      | RELA         |
| 17 | chr17_38153554  | 19 | chr19_10748280  | 0.4761  | 8.354 | 0.003847 | PSMD3     | SLC44A2      |
| 16 | chr16_10998482  | 16 | chr16_31095251  | 0.8131  | 8.353 | 0.00385  | CIITA     | PRSS53       |
| 2  | chr2_103057895  | 12 | chr12_6619284   | 7.765   | 8.349 | 0.00386  | IL18RAP   | NCAPD2       |
| 6  | chr6_111887624  | 18 | chr18_12978733  | 2.457   | 8.348 | 0.003862 | SEH1L     | TRAF3IP2-AS1 |
| 5  | chr5_96121715   | 11 | chr11_9457738   | 5.145   | 8.346 | 0.003865 | ERAP1     | IPO7         |
| 2  | chr2_102968211  | 20 | chr20_48599604  | 4.534   | 8.346 | 0.003866 | IL1RL1    | SNAI1        |
| 2  | chr2_103006448  | 17 | chr17_38029120  | 0.8755  | 8.345 | 0.003868 | IL18R1    | ZPBP2        |
| 2  | chr2_102641201  | 17 | chr17_26110034  | 0.2316  | 8.344 | 0.003871 | IL1R2     | NOS2         |
| 1  | chr1_7846964    | 14 | chr14_35761675  | 0.4748  | 8.34  | 0.003879 | PER3      | PSMA6        |
| 2  | chr2_62733253   | 8  | chr8_3205697    | 2.72    | 8.339 | 0.003879 | CSMD1     | TMEM17       |
| 2  | chr2_102968356  | 20 | chr20_48599604  | 4.53    | 8.336 | 0.003886 | IL1RL1    | SNAI1        |
| 12 | chr12_6636392   | 19 | chr19_10081219  | 2.143   | 8.332 | 0.003895 | COL5A3    | NCAPD2       |
| 2  | chr2_62728046   | 12 | chr12_56740253  | 7.341   | 8.332 | 0.003896 | STAT2     | TMEM17       |
| 5  | chr5_96124447   | 12 | chr12_6623677   | 0.4249  | 8.33  | 0.003899 | ERAP1     | NCAPD2       |
| 10 | chr10_81058027  | 16 | chr16_31095251  | 0.8397  | 8.329 | 0.003902 | PRSS53    | ZMIZ1        |
| 2  | chr2_103040177  | 20 | chr20_48497562  | 3.136   | 8.329 | 0.003902 | IL18RAP   | SLC9A8       |
| 4  | chr4_103594918  | 6  | chr6_395246     | 2.17    | 8.329 | 0.003902 | IRF4      | MANBA        |
| 1  | chr1_67666705   | 14 | chr14_64897018  | 0.3438  | 8.324 | 0.003913 | IL23R     | MIR548AZ     |
| 1  | chr1_26524108   | 4  | chr4_103557219  | 2.173   | 8.322 | 0.003916 | CATSPER4  | MANBA        |
| 10 | chr10_81072398  | 18 | chr18_12978733  | 4.562   | 8.322 | 0.003916 | SEH1L     | ZMIZ1        |
| 2  | chr2_102851400  | 3  | chr3_121646806  | 5.907   | 8.32  | 0.003921 | IL1RL2    | SLC15A2      |
| 1  | chr1_158986477  | 17 | chr17_26115966  | 0.2803  | 8.32  | 0.003922 | IFI16     | NOS2         |
| 19 | chr19_10472933  | 22 | chr22_22123618  | 0.2765  | 8.317 | 0.003927 | MAPK1     | TYK2         |
| 1  | chr1_172634903  | 2  | chr2_102984671  | 0.2086  | 8.316 | 0.003929 | FASLG     | IL18R1       |
| 2  | chr2_102641201  | 4  | chr4_103537442  | 0.8985  | 8.314 | 0.003935 | IL1R2     | NFKB1        |
| 1  | chr1_12082771   | 16 | chr16_11444716  | 0.08266 | 8.313 | 0.003936 | MIIP      | RM12         |
| 17 | chr17_40481529  | 17 | chr17_78445406  | 0.3486  | 8.312 | 0.003939 | NPTX1     | STAT3        |
| 5  | chr5_96125910   | 19 | chr19_10463102  | 2.426   | 8.311 | 0.00394  | ERAP1     | TYK2         |
| 10 | chr10_101934235 | 12 | chr12_6861043   | 0.843   | 8.311 | 0.003942 | ERLIN1    | MLF2         |

|    |                 |    |                 |         |       |          |          |                       |
|----|-----------------|----|-----------------|---------|-------|----------|----------|-----------------------|
| 5  | chr5_150443005  | 16 | chr16_31437374  | 0.2128  | 8.31  | 0.003943 | ITGAD    | TNIP1                 |
| 5  | chr5_96339273   | 10 | chr10_75564556  | 4.199   | 8.307 | 0.003949 | LNPEP    | NDST2                 |
| 6  | chr6_351087     | 17 | chr17_73871467  | 5.299   | 8.305 | 0.003954 | DUSP22   | TRIM47                |
| 3  | chr3_121647656  | 16 | chr16_31373345  | 5.537   | 8.298 | 0.003969 | ITGAX    | SLC15A2               |
| 4  | chr4_103561106  | 12 | chr12_6204679   | 0.07744 | 8.298 | 0.003969 | MANBA    | VWF                   |
| 1  | chr1_152732436  | 12 | chr12_6483522   | 4.434   | 8.296 | 0.003974 | KPRP     | SCNN1A                |
| 1  | chr1_234563556  | 11 | chr11_65793954  | 4.313   | 8.295 | 0.003974 | CATSPER1 | TARBP1                |
| 4  | chr4_103533713  | 17 | chr17_73888273  | 10.86   | 8.294 | 0.003978 | NFKB1    | TRIM65                |
| 5  | chr5_96509055   | 6  | chr6_138196798  | 3.831   | 8.293 | 0.003979 | RIOK2    | TNFAIP3               |
| 2  | chr2_62096845   | 2  | chr2_62728046   | 6.7     | 8.292 | 0.003982 | CCT4     | TMEM17                |
| 10 | chr10_75147491  | 17 | chr17_78171944  | 2.727   | 8.288 | 0.00399  | ANXA7    | CARD14                |
| 11 | chr11_65771097  | 12 | chr12_56744445  | 7.049   | 8.289 | 0.00399  | BANF1    | STAT2                 |
| 2  | chr2_102960007  | 17 | chr17_73539671  | 5.768   | 8.287 | 0.003992 | IL1RL1   | LLGL2                 |
| 1  | chr1_67889571   | 11 | chr11_65771097  | 1.871   | 8.287 | 0.003993 | BANF1    | SERBP1                |
| 10 | chr10_102116399 | 19 | chr19_10104154  | 0.2174  | 8.285 | 0.003998 | COL5A3   | SCD                   |
| 1  | chr1_67889571   | 17 | chr17_73888273  | 1.158   | 8.284 | 0.004    | SERBP1   | TRIM65                |
| 1  | chr1_234584446  | 5  | chr5_96124296   | 1.178   | 8.279 | 0.00401  | ERAP1    | TARBP1                |
| 2  | chr2_61390334   | 19 | chr19_10472933  | 0.2301  | 8.278 | 0.004013 | C2orf74  | TYK2                  |
| 1  | chr1_234607104  | 17 | chr17_78117807  | 0.7433  | 8.278 | 0.004014 | EIF4A3   | TARBP1                |
| 5  | chr5_150443005  | 11 | chr11_9861223   | 4.025   | 8.274 | 0.004021 | SBF2     | TNIP1                 |
| 1  | chr1_152595565  | 5  | chr5_96121715   | 0.5052  | 8.271 | 0.004027 | ERAP1    | LCE3A                 |
| 5  | chr5_96132795   | 19 | chr19_53357239  | 0.6818  | 8.272 | 0.004027 | ERAP1    | ZNF468                |
| 1  | chr1_152384535  | 19 | chr19_10085062  | 8.934   | 8.271 | 0.004029 | COL5A3   | CRNN                  |
| 16 | chr16_11003065  | 17 | chr17_78166385  | 5.197   | 8.268 | 0.004034 | CARD14   | CIITA                 |
| 4  | chr4_103514445  | 6  | chr6_395030     | 0.4917  | 8.263 | 0.004045 | IRF4     | NFKB1                 |
| 5  | chr5_158703976  | 17 | chr17_40716235  | 7.262   | 8.263 | 0.004047 | COASY    | UBLCP1                |
| 17 | chr17_73539671  | 18 | chr18_12979041  | 0.2143  | 8.261 | 0.004052 | LLGL2    | SEH1L                 |
| 1  | chr1_234563556  | 16 | chr16_31309033  | 0.1342  | 8.253 | 0.004068 | ITGAM    | TARBP1                |
| 5  | chr5_96121715   | 10 | chr10_89469017  | 4.054   | 8.253 | 0.004069 | ERAP1    | PAPSS2                |
| 2  | chr2_163137683  | 16 | chr16_11003052  | 6.31    | 8.249 | 0.004076 | CIITA    | IFIH1                 |
| 1  | chr1_234584446  | 5  | chr5_131728231  | 0.2283  | 8.245 | 0.004086 | SLC22A5  | TARBP1                |
| 1  | chr1_152732436  | 17 | chr17_26116762  | 0.4283  | 8.243 | 0.00409  | KPRP     | NOS2                  |
| 11 | chr11_65601560  | 17 | chr17_26101328  | 0.1577  | 8.243 | 0.00409  | NOS2     | SNX32                 |
| 12 | chr12_6495637   | 19 | chr19_10104154  | 0.4119  | 8.242 | 0.004093 | COL5A3   | LTBR                  |
| 5  | chr5_96139250   | 19 | chr19_10132075  | 2.518   | 8.24  | 0.004098 | ERAP1    | RDH8                  |
| 1  | chr1_234563556  | 5  | chr5_96124296   | 1.179   | 8.234 | 0.004111 | ERAP1    | TARBP1                |
| 1  | chr1_159002222  | 17 | chr17_26115966  | 0.2711  | 8.233 | 0.004113 | IFI16    | NOS2                  |
| 12 | chr12_6635276   | 17 | chr17_38063381  | 0.1297  | 8.232 | 0.004115 | GSDMB    | NCAPD2                |
| 3  | chr3_45187671   | 5  | chr5_150518177  | 2.608   | 8.231 | 0.004118 | ANXA6    | CDCP1                 |
| 17 | chr17_40717000  | 17 | chr17_73888354  | 8.946   | 8.23  | 0.004121 | COASY    | TRIM65                |
| 2  | chr2_103006448  | 17 | chr17_38031714  | 0.8744  | 8.229 | 0.004123 | IL18R1   | ZPBP2                 |
| 5  | chr5_158750013  | 18 | chr18_61654219  | 0.3249  | 8.222 | 0.004139 | IL12B    | SERPINB8              |
| 1  | chr1_152595565  | 5  | chr5_96124447   | 0.5174  | 8.22  | 0.004143 | ERAP1    | LCE3A                 |
| 1  | chr1_158986477  | 12 | chr12_6483851   | 1.169   | 8.219 | 0.004145 | IFI16    | SCNN1A                |
| 1  | chr1_152671505  | 2  | chr2_102998279  | 6.919   | 8.216 | 0.004152 | IL18R1   | LCE2A                 |
| 1  | chr1_234546228  | 19 | chr19_10104272  | 5.986   | 8.216 | 0.004153 | COL5A3   | TARBP1                |
| 2  | chr2_103125466  | 5  | chr5_158753736  | 3.7     | 8.213 | 0.004159 | IL12B    | SLC9A4                |
| 9  | chr9_32485487   | 10 | chr10_81060474  | 10.21   | 8.212 | 0.00416  | DDX58    | ZMZ1                  |
| 12 | chr12_6619284   | 17 | chr17_38345233  | 3.718   | 8.212 | 0.004162 | NCAPD2   | RAPGEFL1              |
| 1  | chr1_152671505  | 2  | chr2_103006448  | 6.916   | 8.211 | 0.004163 | IL18R1   | LCE2A                 |
| 1  | chr1_152681689  | 14 | chr14_35871960  | 0.4727  | 8.209 | 0.004168 | LCE4A    | NFKBIA                |
| 5  | chr5_96222183   | 18 | chr18_13050127  | 7.322   | 8.209 | 0.004168 | CEP192   | ERAP2                 |
| 19 | chr19_10096742  | 19 | chr19_10464687  | 1.775   | 8.204 | 0.004179 | COL5A3   | TYK2                  |
| 6  | chr6_395246     | 12 | chr12_6464809   | 5.055   | 8.202 | 0.004185 | IRF4     | SCNN1A                |
| 1  | chr1_159023338  | 5  | chr5_96139250   | 2.761   | 8.201 | 0.004187 | ERAP1    | IFI16                 |
| 1  | chr1_159023338  | 5  | chr5_96118852   | 2.609   | 8.199 | 0.004192 | ERAP1    | IFI16                 |
| 1  | chr1_159002222  | 19 | chr19_10081322  | 1.464   | 8.198 | 0.004193 | COL5A3   | IFI16                 |
| 1  | chr1_207010368  | 10 | chr10_81058027  | 0.2795  | 8.198 | 0.004193 | IL19     | ZMZ1                  |
| 1  | chr1_234584446  | 19 | chr19_53456074  | 0.1564  | 8.198 | 0.004193 | TARBP1   | ZNF816,ZNF816-ZNF321P |
| 5  | chr5_96249323   | 19 | chr19_10226273  | 2.935   | 8.192 | 0.004207 | EIF3G    | ERAP2                 |
| 4  | chr4_103514445  | 12 | chr12_111990836 | 2.557   | 8.192 | 0.004208 | ATXN2    | NFKB1                 |
| 16 | chr16_10998482  | 16 | chr16_30938811  | 0.7977  | 8.189 | 0.004215 | CIITA    | FBXL19                |
| 12 | chr12_56436011  | 19 | chr19_10464687  | 0.4195  | 8.187 | 0.004219 | RPS26    | TYK2                  |
| 10 | chr10_102222984 | 11 | chr11_65422853  | 6.599   | 8.186 | 0.004221 | RELA     | WNT8B                 |

|    |                 |    |                 |         |       |          |         |          |
|----|-----------------|----|-----------------|---------|-------|----------|---------|----------|
| 5  | chr5_96117300   | 16 | chr16_31422761  | 6.396   | 8.183 | 0.004229 | ERAP1   | ITGAD    |
| 10 | chr10_81056383  | 16 | chr16_31374642  | 5.544   | 8.182 | 0.004231 | ITGAX   | ZMZ1     |
| 5  | chr5_96503305   | 12 | chr12_6483851   | 0.1151  | 8.181 | 0.004233 | RIOK2   | SCNN1A   |
| 2  | chr2_102997884  | 19 | chr19_10114795  | 4.146   | 8.18  | 0.004236 | COL5A3  | IL18R1   |
| 1  | chr1_152681722  | 1  | chr1_158986225  | 0.3687  | 8.177 | 0.004241 | IFI16   | LCE4A    |
| 2  | chr2_103006448  | 11 | chr11_64003792  | 8.771   | 8.177 | 0.004242 | IL18R1  | VEGFB    |
| 10 | chr10_81060474  | 16 | chr16_30936081  | 0.8244  | 8.173 | 0.004252 | FBXL19  | ZMZ1     |
| 2  | chr2_103040945  | 17 | chr17_40854650  | 2.982   | 8.169 | 0.004262 | EZH1    | IL18RAP  |
| 2  | chr2_102957348  | 19 | chr19_10097373  | 3.651   | 8.166 | 0.004268 | COL5A3  | IL1RL1   |
| 1  | chr1_158986225  | 17 | chr17_73515227  | 2.533   | 8.161 | 0.004279 | IFI16   | TSEN54   |
| 2  | chr2_102968356  | 17 | chr17_38024626  | 0.8749  | 8.159 | 0.004285 | IL1RL1  | ZPBP2    |
| 12 | chr12_112499067 | 17 | chr17_78178182  | 0.1547  | 8.156 | 0.004291 | CARD14  | NAA25    |
| 1  | chr1_206944785  | 19 | chr19_53454387  | 8.061   | 8.155 | 0.004294 | IL10    | ZNF816   |
| 12 | chr12_56384687  | 14 | chr14_35872094  | 1.562   | 8.155 | 0.004294 | NFKBIA  | RAB5B    |
| 1  | chr1_152800058  | 12 | chr12_6483463   | 3.418   | 8.154 | 0.004296 | LCE1A   | SCNN1A   |
| 2  | chr2_163136771  | 12 | chr12_112479891 | 0.2468  | 8.153 | 0.004299 | IFIH1   | NAA25    |
| 5  | chr5_150515865  | 18 | chr18_12984340  | 4.603   | 8.152 | 0.004302 | ANXA6   | SEH1L    |
| 4  | chr4_103571513  | 5  | chr5_150496853  | 0.5606  | 8.148 | 0.004311 | ANXA6   | MANBA    |
| 10 | chr10_81058027  | 12 | chr12_56481966  | 3.008   | 8.147 | 0.004314 | ERBB3   | ZMZ1     |
| 16 | chr16_31332628  | 19 | chr19_10472933  | 0.4221  | 8.145 | 0.004319 | ITGAM   | TYK2     |
| 5  | chr5_96237114   | 18 | chr18_13050127  | 7.263   | 8.142 | 0.004325 | CEP192  | ERAP2    |
| 6  | chr6_351087     | 17 | chr17_73888354  | 5.213   | 8.137 | 0.004337 | DUSP22  | TRIM65   |
| 1  | chr1_159002222  | 16 | chr16_31371659  | 2.115   | 8.137 | 0.004338 | IFI16   | ITGAX    |
| 5  | chr5_96121183   | 5  | chr5_96232222   | 1.22    | 8.136 | 0.00434  | ERAP1   | ERAP2    |
| 5  | chr5_96121069   | 9  | chr9_32634619   | 6.062   | 8.135 | 0.004342 | ERAP1   | TAF1L    |
| 1  | chr1_152759678  | 5  | chr5_131825142  | 2.625   | 8.132 | 0.004348 | IRF1    | LCE1E    |
| 2  | chr2_102955683  | 12 | chr12_56480404  | 0.09104 | 8.131 | 0.004351 | ERBB3   | IL1RL1   |
| 4  | chr4_103488346  | 17 | chr17_78178170  | 0.3328  | 8.13  | 0.004353 | CARD14  | NFKB1    |
| 2  | chr2_163139026  | 4  | chr4_103594918  | 0.1278  | 8.13  | 0.004354 | IFIH1   | MANBA    |
| 2  | chr2_163137695  | 17 | chr17_40716235  | 1.148   | 8.129 | 0.004357 | COASY   | IFIH1    |
| 1  | chr1_234573171  | 3  | chr3_121646806  | 0.808   | 8.128 | 0.00436  | SLC15A2 | TARBP1   |
| 5  | chr5_96232222   | 18 | chr18_13050127  | 7.249   | 8.127 | 0.004361 | CEP192  | ERAP2    |
| 12 | chr12_56490656  | 19 | chr19_10464687  | 0.2815  | 8.123 | 0.004371 | ERBB3   | TYK2     |
| 5  | chr5_158705065  | 6  | chr6_138628802  | 3.658   | 8.121 | 0.004375 | ARFGEF3 | UBLCP1   |
| 1  | chr1_152770521  | 17 | chr17_26116762  | 0.4017  | 8.121 | 0.004376 | LCE1D   | NOS2     |
| 16 | chr16_11009267  | 20 | chr20_48497562  | 3.234   | 8.119 | 0.004381 | CIITA   | SLC9A8   |
| 11 | chr11_64543820  | 16 | chr16_31095251  | 0.2655  | 8.117 | 0.004386 | PRSS53  | SF1      |
| 11 | chr11_9810776   | 19 | chr19_10472933  | 0.3826  | 8.117 | 0.004386 | SBF2    | TYK2     |
| 1  | chr1_159002222  | 6  | chr6_111912800  | 2.443   | 8.116 | 0.004388 | IFI16   | TRAF3IP2 |
| 5  | chr5_96222496   | 17 | chr17_40716235  | 2.433   | 8.115 | 0.004389 | COASY   | ERAP2    |
| 5  | chr5_96252998   | 11 | chr11_10015506  | 3.446   | 8.115 | 0.004391 | ERAP2   | SBF2     |
| 7  | chr7_36927231   | 19 | chr19_10085062  | 0.1616  | 8.11  | 0.004402 | COL5A3  | ELMO1    |
| 1  | chr1_12253152   | 1  | chr1_152770589  | 0.1993  | 8.108 | 0.004408 | LCE1D   | TNFRSF1B |
| 2  | chr2_163137683  | 17 | chr17_40467745  | 3.876   | 8.107 | 0.004408 | IFIH1   | STAT3    |
| 4  | chr4_103561106  | 13 | chr13_40293469  | 5.069   | 8.107 | 0.004409 | COG6    | MANBA    |
| 2  | chr2_103006387  | 12 | chr12_56526164  | 0.2497  | 8.107 | 0.00441  | ESYT1   | IL18R1   |
| 2  | chr2_102957348  | 19 | chr19_49671451  | 3.461   | 8.106 | 0.004411 | IL1RL1  | TRPM4    |
| 2  | chr2_103040177  | 12 | chr12_6623942   | 0.1632  | 8.106 | 0.004412 | IL18RAP | NCAPD2   |
| 2  | chr2_102960007  | 8  | chr8_3265671    | 6.112   | 8.105 | 0.004414 | CSMD1   | IL1RL1   |
| 5  | chr5_96117300   | 11 | chr11_9457738   | 3.794   | 8.104 | 0.004418 | ERAP1   | IPO7     |
| 5  | chr5_96237114   | 6  | chr6_138539306  | 2.409   | 8.102 | 0.004421 | ERAP2   | PBOV1    |
| 1  | chr1_159002778  | 19 | chr19_10081322  | 1.465   | 8.099 | 0.004429 | COL5A3  | IFI16    |
| 1  | chr1_152732436  | 10 | chr10_75139799  | 5.249   | 8.096 | 0.004437 | ANXA7   | KPRP     |
| 1  | chr1_158987941  | 17 | chr17_38153711  | 2.997   | 8.096 | 0.004437 | IFI16   | PSMD3    |
| 1  | chr1_207009910  | 12 | chr12_56537544  | 0.2383  | 8.095 | 0.004438 | ESYT1   | IL19     |
| 1  | chr1_152329369  | 16 | chr16_10992745  | 3.849   | 8.092 | 0.004445 | CIITA   | FLG2     |
| 2  | chr2_102984624  | 4  | chr4_103514445  | 0.8889  | 8.089 | 0.004453 | IL18R1  | NFKB1    |
| 1  | chr1_152770589  | 5  | chr5_131825142  | 2.775   | 8.088 | 0.004455 | IRF1    | LCE1D    |
| 1  | chr1_67666705   | 14 | chr14_64896783  | 0.3489  | 8.083 | 0.004467 | IL23R   | MIR548AZ |
| 1  | chr1_158986477  | 10 | chr10_90034899  | 1.114   | 8.083 | 0.004468 | IFI16   | RNLS     |
| 1  | chr1_158986225  | 5  | chr5_150497409  | 0.1712  | 8.082 | 0.004469 | ANXA6   | IFI16    |
| 2  | chr2_102960007  | 17 | chr17_40854650  | 3.35    | 8.082 | 0.004472 | EZH1    | IL1RL1   |
| 2  | chr2_163137871  | 4  | chr4_103553090  | 0.8739  | 8.081 | 0.004472 | IFIH1   | MANBA    |
| 1  | chr1_152770589  | 6  | chr6_138539204  | 5.962   | 8.078 | 0.004479 | LCE1D   | PBOV1    |

|    |                 |    |                 |        |       |          |         |              |
|----|-----------------|----|-----------------|--------|-------|----------|---------|--------------|
| 5  | chr5_158750013  | 19 | chr19_49618883  | 0.2746 | 8.078 | 0.00448  | IL12B   | LIN7B        |
| 4  | chr4_103594918  | 22 | chr22_22153398  | 2.403  | 8.077 | 0.004482 | MANBA   | MAPK1        |
| 2  | chr2_102968007  | 20 | chr20_48599604  | 4.425  | 8.075 | 0.004489 | IL1RL1  | SNAI1        |
| 2  | chr2_62728105   | 19 | chr19_49540044  | 0.2221 | 8.072 | 0.004497 | CGB1    | TMEM17       |
| 1  | chr1_206972365  | 2  | chr2_102968356  | 6.479  | 8.065 | 0.004512 | IL19    | IL1RL1       |
| 1  | chr1_67838353   | 1  | chr1_152329369  | 2.909  | 8.065 | 0.004513 | FLG2    | IL12RB2      |
| 2  | chr2_103011237  | 6  | chr6_111922466  | 0.192  | 8.064 | 0.004516 | IL18R1  | TRAF3IP2-AS1 |
| 7  | chr7_37172827   | 12 | chr12_56384687  | 4.046  | 8.062 | 0.004519 | ELMO1   | RAB5B        |
| 1  | chr1_26524108   | 12 | chr12_111895203 | 3.302  | 8.061 | 0.004522 | ATXN2   | CATSPER4     |
| 2  | chr2_163137695  | 17 | chr17_40467745  | 3.861  | 8.061 | 0.004522 | IFIH1   | STAT3        |
| 12 | chr12_112499067 | 17 | chr17_78178830  | 7.72   | 8.061 | 0.004524 | CARD14  | NAA25        |
| 1  | chr1_159002778  | 6  | chr6_111912800  | 2.437  | 8.06  | 0.004526 | IFI16   | TRAF3IP2     |
| 10 | chr10_102116355 | 19 | chr19_49206631  | 0.3744 | 8.059 | 0.004528 | FUT2    | SCD          |
| 3  | chr3_121647656  | 11 | chr11_9983631   | 0.4523 | 8.056 | 0.004537 | SBF2    | SLC15A2      |
| 3  | chr3_45187671   | 5  | chr5_150509120  | 3.907  | 8.055 | 0.004538 | ANXA6   | CDCP1        |
| 12 | chr12_56737245  | 16 | chr16_31095204  | 0.1561 | 8.055 | 0.004539 | PRSS53  | STAT2        |
| 2  | chr2_103040945  | 11 | chr11_65372777  | 2.455  | 8.051 | 0.004548 | IL18RAP | MAP3K11      |
| 2  | chr2_62728105   | 9  | chr9_32631110   | 0.2138 | 8.046 | 0.004561 | TAF1L   | TMEM17       |
| 5  | chr5_96237114   | 16 | chr16_31272988  | 2.505  | 8.044 | 0.004566 | ERAP2   | ITGAM        |
| 1  | chr1_207014445  | 2  | chr2_103006387  | 4.99   | 8.042 | 0.00457  | IL18R1  | IL19         |
| 12 | chr12_6464809   | 19 | chr19_10096742  | 2.801  | 8.042 | 0.00457  | COL5A3  | SCNN1A       |
| 2  | chr2_102968356  | 11 | chr11_64003792  | 8.63   | 8.041 | 0.004572 | IL1RL1  | VEGFB        |
| 4  | chr4_103594918  | 17 | chr17_40498527  | 0.1917 | 8.041 | 0.004572 | MANBA   | STAT3        |
| 12 | chr12_6464809   | 19 | chr19_10103573  | 5.664  | 8.041 | 0.004573 | COL5A3  | SCNN1A       |
| 2  | chr2_61175288   | 20 | chr20_48467560  | 0.2346 | 8.038 | 0.00458  | PUS10   | SLC9A8       |
| 2  | chr2_102960007  | 11 | chr11_9806626   | 0.213  | 8.037 | 0.004582 | IL1RL1  | SBF2-AS1     |
| 12 | chr12_6500105   | 13 | chr13_99992763  | 7.456  | 8.037 | 0.004584 | LTBR    | UBAC2        |
| 2  | chr2_103006387  | 17 | chr17_38146282  | 0.2887 | 8.035 | 0.004588 | IL18R1  | PSMD3        |
| 4  | chr4_103594938  | 17 | chr17_40498527  | 0.1918 | 8.035 | 0.004588 | MANBA   | STAT3        |
| 4  | chr4_103534560  | 17 | chr17_40490762  | 0.2353 | 8.035 | 0.004589 | NFKB1   | STAT3        |
| 2  | chr2_62733253   | 8  | chr8_3201033    | 3.063  | 8.034 | 0.00459  | CSMD1   | TMEM17       |
| 5  | chr5_150443005  | 16 | chr16_11004061  | 0.1815 | 8.034 | 0.00459  | CIITA   | TNIP1        |
| 1  | chr1_152671505  | 2  | chr2_103011237  | 6.763  | 8.032 | 0.004596 | IL18R1  | LCE2A        |
| 1  | chr1_207009910  | 12 | chr12_122354028 | 0.1406 | 8.03  | 0.0046   | IL19    | PSMD9        |
| 1  | chr1_159002778  | 16 | chr16_31371659  | 2.111  | 8.026 | 0.00461  | IFI16   | ITGAX        |
| 12 | chr12_6560167   | 20 | chr20_48522585  | 3.6    | 8.026 | 0.004612 | CD27    | SPATA2       |
| 2  | chr2_102998279  | 6  | chr6_111922466  | 0.1926 | 8.025 | 0.004614 | IL18R1  | TRAF3IP2-AS1 |
| 1  | chr1_152759678  | 4  | chr4_103645041  | 3.449  | 8.024 | 0.004617 | LCE1E   | MANBA        |
| 17 | chr17_73539671  | 18 | chr18_12978733  | 0.2183 | 8.023 | 0.004618 | LLGL2   | SEH1L        |
| 6  | chr6_111887624  | 17 | chr17_78171944  | 1.877  | 8.022 | 0.004621 | CARD14  | TRAF3IP2-AS1 |
| 12 | chr12_6861043   | 17 | chr17_40497728  | 0.196  | 8.022 | 0.004622 | MLF2    | STAT3        |
| 2  | chr2_102957348  | 12 | chr12_6623942   | 0.1623 | 8.021 | 0.004624 | IL1RL1  | NCAPD2       |
| 9  | chr9_32631356   | 19 | chr19_10464687  | 3.392  | 8.021 | 0.004624 | TAF1L   | TYK2         |
| 3  | chr3_121646805  | 19 | chr19_10108850  | 0.0961 | 8.02  | 0.004626 | COL5A3  | SLC15A2      |
| 17 | chr17_38063381  | 21 | chr21_35174730  | 2.566  | 8.018 | 0.004632 | GSDMB   | ITSN1        |
| 9  | chr9_32974535   | 10 | chr10_81056383  | 9.777  | 8.018 | 0.004633 | APTX    | ZMIZ1        |
| 1  | chr1_234584446  | 5  | chr5_150518177  | 0.3901 | 8.015 | 0.004639 | ANXA6   | TARBP1       |
| 12 | chr12_6464958   | 19 | chr19_10464687  | 0.4224 | 8.014 | 0.004641 | SCNN1A  | TYK2         |
| 2  | chr2_103040945  | 14 | chr14_35761791  | 0.2451 | 8.013 | 0.004645 | IL18RAP | PSMA6        |
| 1  | chr1_234563154  | 12 | chr12_56384687  | 3.965  | 8.012 | 0.004647 | RAB5B   | TARBP1       |
| 2  | chr2_62728046   | 5  | chr5_79730041   | 0.2917 | 8.009 | 0.004653 | TMEM17  | ZFYVE16      |
| 2  | chr2_102960007  | 5  | chr5_150497409  | 0.152  | 8.009 | 0.004654 | ANXA6   | IL1RL1       |
| 5  | chr5_150518177  | 20 | chr20_48467560  | 2.791  | 8.007 | 0.004659 | ANXA6   | SLC9A8       |
| 1  | chr1_158986225  | 17 | chr17_38153711  | 3.476  | 8.005 | 0.004666 | IFI16   | PSMD3        |
| 5  | chr5_131671710  | 19 | chr19_10104154  | 0.3017 | 8.003 | 0.00467  | COL5A3  | LOC553103    |
| 2  | chr2_102984624  | 6  | chr6_111887624  | 0.3871 | 8.002 | 0.004672 | IL18R1  | TRAF3IP2-AS1 |
| 2  | chr2_102959885  | 5  | chr5_96222185   | 5.393  | 8.001 | 0.004676 | ERAP2   | IL1RL1       |
| 5  | chr5_96339273   | 8  | chr8_3432543    | 2.502  | 7.999 | 0.004681 | CSMD1   | LNPEP        |
| 2  | chr2_61128164   | 5  | chr5_96249323   | 2.503  | 7.998 | 0.004682 | ERAP2   | REL          |
| 17 | chr17_38345292  | 19 | chr19_10085062  | 0.2059 | 7.996 | 0.004687 | COL5A3  | RAPGEFL1     |
| 17 | chr17_40481529  | 22 | chr22_22143007  | 0.2343 | 7.995 | 0.004692 | MAPK1   | STAT3        |
| 18 | chr18_12859034  | 19 | chr19_53454387  | 10.91  | 7.994 | 0.004694 | PTPN2   | ZNF816       |
| 2  | chr2_62728046   | 19 | chr19_10812975  | 3.089  | 7.989 | 0.004707 | QTRT1   | TMEM17       |
| 17 | chr17_38024626  | 21 | chr21_35174730  | 2.593  | 7.988 | 0.004708 | ITSN1   | ZBP2         |



|    |                |    |                |         |       |          |           |           |
|----|----------------|----|----------------|---------|-------|----------|-----------|-----------|
| 1  | chr1_152759678 | 19 | chr19_10421269 | 8.299   | 7.987 | 0.004711 | FDX1L     | LCE1E     |
| 1  | chr1_159002222 | 12 | chr12_6619794  | 3.017   | 7.986 | 0.004714 | IFI16     | NCAPD2    |
| 2  | chr2_163253471 | 4  | chr4_103534560 | 0.201   | 7.986 | 0.004714 | KCNH7     | NFKB1     |
| 1  | chr1_8075575   | 4  | chr4_103553090 | 0.3539  | 7.985 | 0.004716 | ERRFI1    | MANBA     |
| 2  | chr2_103090127 | 12 | chr12_6619334  | 1.951   | 7.985 | 0.004718 | NCAPD2    | SLC9A4    |
| 1  | chr1_152759678 | 16 | chr16_11141179 | 0.2273  | 7.984 | 0.004719 | CLEC16A   | LCE1E     |
| 5  | chr5_131671710 | 17 | chr17_73871467 | 2.746   | 7.983 | 0.004722 | LOC553103 | TRIM47    |
| 12 | chr12_56384687 | 18 | chr18_12979041 | 1.147   | 7.98  | 0.00473  | RAB5B     | SEH1L     |
| 1  | chr1_158987941 | 20 | chr20_48522414 | 0.4603  | 7.979 | 0.004731 | IFI16     | SPATA2    |
| 7  | chr7_37136346  | 19 | chr19_10472933 | 0.1832  | 7.979 | 0.004733 | ELMO1     | TYK2      |
| 4  | chr4_103557251 | 5  | chr5_96118852  | 1.092   | 7.978 | 0.004735 | ERAP1     | MANBA     |
| 2  | chr2_102984671 | 17 | chr17_40854650 | 3.257   | 7.978 | 0.004736 | EZHI      | IL18R1    |
| 5  | chr5_96513471  | 22 | chr22_22160172 | 8.223   | 7.977 | 0.004738 | MAPK1     | RIOK2     |
| 1  | chr1_12249031  | 20 | chr20_48562657 | 4.174   | 7.976 | 0.00474  | RNF114    | TNFRSF1B  |
| 2  | chr2_163137871 | 17 | chr17_40467745 | 3.832   | 7.974 | 0.004746 | IFIH1     | STAT3     |
| 1  | chr1_158986477 | 17 | chr17_73515227 | 2.502   | 7.972 | 0.004751 | IFI16     | TSEN54    |
| 5  | chr5_96124447  | 6  | chr6_138196860 | 0.177   | 7.971 | 0.004752 | ERAP1     | TNFAIP3   |
| 1  | chr1_11917786  | 21 | chr21_34954851 | 5.876   | 7.971 | 0.004754 | DONSON    | NPPB      |
| 2  | chr2_62733253  | 3  | chr3_121642101 | 0.2723  | 7.971 | 0.004754 | SLC15A2   | TMEM17    |
| 2  | chr2_103006387 | 17 | chr17_73539671 | 4.746   | 7.966 | 0.004765 | IL18R1    | LLGL2     |
| 4  | chr4_103534560 | 16 | chr16_31374642 | 2.409   | 7.966 | 0.004767 | ITGAX     | NFKB1     |
| 12 | chr12_6560167  | 20 | chr20_48524827 | 3.288   | 7.965 | 0.004769 | CD27      | SPATA2    |
| 5  | chr5_96139250  | 10 | chr10_89469017 | 3.723   | 7.958 | 0.004787 | ERAP1     | PAPSS2    |
| 11 | chr11_9853777  | 17 | chr17_26110034 | 0.2368  | 7.957 | 0.00479  | NOS2      | SBF2      |
| 12 | chr12_6562768  | 12 | chr12_56744422 | 1.455   | 7.957 | 0.004791 | STAT2     | TAPBP1    |
| 1  | chr1_159002222 | 8  | chr8_3200840   | 0.195   | 7.954 | 0.004798 | CSMD1     | IFI16     |
| 12 | chr12_6604076  | 12 | chr12_56364898 | 0.327   | 7.954 | 0.004798 | CDK2      | NCAPD2    |
| 1  | chr1_234573171 | 5  | chr5_131728231 | 0.2343  | 7.954 | 0.004799 | SLC22A5   | TARBP1    |
| 4  | chr4_103594938 | 6  | chr6_395246    | 2.103   | 7.953 | 0.004802 | IRF4      | MANBA     |
| 1  | chr1_152329369 | 16 | chr16_31283312 | 8.227   | 7.951 | 0.004806 | FLG2      | ITGAM     |
| 12 | chr12_6483463  | 18 | chr18_12978733 | 0.8611  | 7.95  | 0.00481  | SCNN1A    | SEH1L     |
| 2  | chr2_163136771 | 16 | chr16_11003052 | 6.113   | 7.948 | 0.004814 | CIITA     | IFIH1     |
| 1  | chr1_158548793 | 1  | chr1_158986225 | 0.4671  | 7.944 | 0.004825 | IFI16     | OR10X1    |
| 5  | chr5_131671710 | 19 | chr19_10104272 | 0.3045  | 7.943 | 0.004827 | COL5A3    | LOC553103 |
| 17 | chr17_38033109 | 17 | chr17_78180618 | 1.968   | 7.941 | 0.004833 | CARD14    | ZPBP2     |
| 19 | chr19_10467300 | 19 | chr19_53454387 | 6.731   | 7.941 | 0.004833 | TYK2      | WNF816    |
| 2  | chr2_163149896 | 12 | chr12_6131085  | 5.147   | 7.941 | 0.004833 | IFIH1     | VWF       |
| 1  | chr1_234565787 | 16 | chr16_31309033 | 0.137   | 7.94  | 0.004836 | ITGAM     | TARBP1    |
| 2  | chr2_102968007 | 16 | chr16_11051783 | 8.859   | 7.938 | 0.00484  | CLEC16A   | IL1RL1    |
| 2  | chr2_103125457 | 12 | chr12_56481493 | 11.2    | 7.938 | 0.00484  | ERBB3     | SLC9A4    |
| 5  | chr5_96139250  | 16 | chr16_31339529 | 0.303   | 7.938 | 0.004841 | ERAP1     | ITGAM     |
| 1  | chr1_152759678 | 12 | chr12_56524333 | 0.173   | 7.937 | 0.004843 | ESYT1     | LCE1E     |
| 12 | chr12_6167131  | 12 | chr12_6626369  | 0.4582  | 7.936 | 0.004846 | NCAPD2    | VWF       |
| 11 | chr11_9990163  | 18 | chr18_12984340 | 6.329   | 7.936 | 0.004847 | SBF2      | SEH1L     |
| 3  | chr3_121647656 | 11 | chr11_10019847 | 4.753   | 7.935 | 0.004848 | SBF2      | SLC15A2   |
| 1  | chr1_152760075 | 2  | chr2_62228016  | 0.1238  | 7.933 | 0.004854 | COMMD1    | LCE1E     |
| 14 | chr14_35780167 | 19 | chr19_49447713 | 10.47   | 7.932 | 0.004856 | DHDH      | PSMA6     |
| 2  | chr2_103040182 | 12 | chr12_56437315 | 0.05212 | 7.931 | 0.004858 | IL18RAP   | RPS26     |
| 1  | chr1_158986225 | 19 | chr19_10081322 | 1.448   | 7.931 | 0.004859 | COL5A3    | IFI16     |
| 5  | chr5_131825152 | 19 | chr19_10475652 | 4.875   | 7.931 | 0.00486  | IRF1      | TYK2      |
| 12 | chr12_56437315 | 17 | chr17_38031714 | 2.658   | 7.93  | 0.004861 | RPS26     | ZPBP2     |
| 12 | chr12_6174384  | 16 | chr16_31095204 | 0.03803 | 7.929 | 0.004865 | PRSS53    | VWF       |
| 2  | chr2_102957348 | 5  | chr5_79768604  | 0.2495  | 7.927 | 0.004871 | IL1RL1    | ZFYVE16   |
| 5  | chr5_158705065 | 16 | chr16_10998482 | 0.8865  | 7.927 | 0.004871 | CIITA     | UBLCP1    |
| 2  | chr2_102641201 | 12 | chr12_56527333 | 0.2713  | 7.925 | 0.004876 | ESYT1     | IL1R2     |
| 16 | chr16_11444716 | 16 | chr16_31418836 | 0.1445  | 7.923 | 0.004882 | ITGAD     | RMI2      |
| 14 | chr14_35782244 | 19 | chr19_10464687 | 0.3272  | 7.922 | 0.004884 | PSMA6     | TYK2      |
| 1  | chr1_152681717 | 1  | chr1_159002778 | 0.5477  | 7.92  | 0.004889 | IFI16     | LCE4A     |
| 1  | chr1_8073450   | 17 | chr17_78178189 | 6.085   | 7.92  | 0.00489  | CARD14    | ERRFI1    |
| 10 | chr10_81072398 | 20 | chr20_48599549 | 0.3067  | 7.919 | 0.004891 | SNAI1     | ZMIZ1     |
| 1  | chr1_12387829  | 1  | chr1_158987941 | 0.1191  | 7.918 | 0.004894 | IFI16     | VPS13D    |
| 1  | chr1_152283119 | 2  | chr2_102984671 | 4.685   | 7.917 | 0.004897 | FLG       | IL18R1    |
| 2  | chr2_102967928 | 5  | chr5_132035036 | 3.209   | 7.917 | 0.004898 | IL1RL1    | KIF3A     |
| 5  | chr5_79744070  | 18 | chr18_12979041 | 7.112   | 7.916 | 0.004899 | SEH1L     | ZFYVE16   |

|    |                 |    |                 |        |       |          |           |         |
|----|-----------------|----|-----------------|--------|-------|----------|-----------|---------|
| 2  | chr2_163361103  | 20 | chr20_48566065  | 0.1345 | 7.916 | 0.004901 | KCNH7     | RNF114  |
| 14 | chr14_35782244  | 19 | chr19_10104154  | 0.1605 | 7.914 | 0.004904 | COL5A3    | PSMA6   |
| 1  | chr1_152770589  | 17 | chr17_40498461  | 0.6772 | 7.914 | 0.004906 | LCE1D     | STAT3   |
| 3  | chr3_121658343  | 5  | chr5_96237114   | 4.183  | 7.914 | 0.004906 | ERAP2     | SLC15A2 |
| 1  | chr1_158986225  | 3  | chr3_121659930  | 1.372  | 7.912 | 0.00491  | IFI16     | SLC15A2 |
| 3  | chr3_121646666  | 17 | chr17_78178830  | 0.216  | 7.912 | 0.004911 | CARD14    | SLC15A2 |
| 5  | chr5_96222185   | 18 | chr18_13050127  | 7.158  | 7.909 | 0.004918 | CEP192    | ERAP2   |
| 17 | chr17_40481529  | 19 | chr19_49206631  | 1.089  | 7.908 | 0.004922 | FUT2      | STAT3   |
| 2  | chr2_103040182  | 17 | chr17_77753128  | 23.42  | 7.908 | 0.004922 | CBX2      | IL18RAP |
| 10 | chr10_81058027  | 12 | chr12_6604076   | 0.9037 | 7.907 | 0.004925 | NCAPD2    | ZMZ1    |
| 3  | chr3_121810428  | 19 | chr19_10081219  | 11.8   | 7.905 | 0.004929 | CD86      | COL5A3  |
| 2  | chr2_103090127  | 8  | chr8_3889595    | 0.4058 | 7.905 | 0.00493  | CSMD1     | SLC9A4  |
| 2  | chr2_102984671  | 17 | chr17_73539671  | 4.712  | 7.903 | 0.004934 | IL18R1    | LLGL2   |
| 2  | chr2_102997884  | 19 | chr19_10097373  | 3.57   | 7.903 | 0.004936 | COL5A3    | IL18R1  |
| 1  | chr1_67792496   | 1  | chr1_158986225  | 2.312  | 7.902 | 0.004938 | IFI16     | IL12RB2 |
| 12 | chr12_6204841   | 17 | chr17_78178189  | 2.543  | 7.902 | 0.004938 | CARD14    | VWF     |
| 5  | chr5_158705065  | 17 | chr17_26101387  | 0.3511 | 7.902 | 0.004938 | NOS2      | UBLCP1  |
| 2  | chr2_60695977   | 17 | chr17_38153473  | 3.518  | 7.9   | 0.004943 | BCL11A    | PSMD3   |
| 4  | chr4_103594938  | 10 | chr10_75136022  | 0.1639 | 7.897 | 0.004951 | ANXA7     | MANBA   |
| 14 | chr14_35761675  | 19 | chr19_10106849  | 11.61  | 7.896 | 0.004955 | COL5A3    | PSMA6   |
| 1  | chr1_152770589  | 12 | chr12_112479891 | 2.144  | 7.895 | 0.004958 | LCE1D     | NAA25   |
| 17 | chr17_26116696  | 17 | chr17_73871467  | 0.3385 | 7.894 | 0.00496  | NOS2      | TRIM47  |
| 2  | chr2_102984624  | 5  | chr5_132035036  | 3.134  | 7.893 | 0.004962 | IL18R1    | KIF3A   |
| 4  | chr4_103594938  | 5  | chr5_150496629  | 0.3016 | 7.893 | 0.004962 | ANXA6     | MANBA   |
| 2  | chr2_162875478  | 17 | chr17_38153554  | 2.216  | 7.891 | 0.004967 | DPP4      | PSMD3   |
| 6  | chr6_138615085  | 10 | chr10_81056383  | 26.77  | 7.891 | 0.004968 | ARFGEF3   | ZMZ1    |
| 2  | chr2_103040182  | 17 | chr17_38029120  | 0.8608 | 7.889 | 0.004974 | IL18RAP   | ZPBP2   |
| 2  | chr2_103090127  | 4  | chr4_103561106  | 1.174  | 7.888 | 0.004975 | MANBA     | SLC9A4  |
| 4  | chr4_103488278  | 17 | chr17_78178182  | 0.2907 | 7.889 | 0.004975 | CARD14    | NFKB1   |
| 16 | chr16_31388246  | 19 | chr19_49206631  | 2.945  | 7.888 | 0.004976 | FUT2      | ITGAX   |
| 2  | chr2_102984624  | 8  | chr8_3205697    | 0.2501 | 7.887 | 0.004979 | CSMD1     | IL18R1  |
| 10 | chr10_90034899  | 12 | chr12_56525675  | 13.72  | 7.886 | 0.004981 | ESYT1     | RNLS    |
| 2  | chr2_102957348  | 17 | chr17_77753128  | 23.3   | 7.882 | 0.004992 | CBX2      | IL1RL1  |
| 1  | chr1_172633592  | 2  | chr2_103006448  | 2.617  | 7.879 | 0.005    | FASLG     | IL18R1  |
| 16 | chr16_11016173  | 17 | chr17_78178189  | 0.1367 | 7.872 | 0.005021 | CARD14    | CIITA   |
| 1  | chr1_234563556  | 19 | chr19_49230702  | 3.247  | 7.872 | 0.005022 | RASIP1    | TIRBP1  |
| 2  | chr2_103039873  | 5  | chr5_96116995   | 4.414  | 7.867 | 0.005034 | ERAP1     | IL18RAP |
| 3  | chr3_121646806  | 16 | chr16_31434735  | 10.93  | 7.866 | 0.005038 | ITGAD     | SLC15A2 |
| 2  | chr2_103011237  | 21 | chr21_35175117  | 0.2085 | 7.863 | 0.005047 | IL18R1    | ITSN1   |
| 1  | chr1_172633592  | 2  | chr2_102968211  | 2.786  | 7.862 | 0.005048 | FASLG     | IL1RL1  |
| 2  | chr2_103006448  | 11 | chr11_128354978 | 5.535  | 7.862 | 0.005048 | ETS1      | IL18R1  |
| 11 | chr11_65771097  | 12 | chr12_56744422  | 6.703  | 7.861 | 0.00505  | BANF1     | STAT2   |
| 5  | chr5_131825142  | 17 | chr17_78178170  | 0.4104 | 7.86  | 0.005053 | CARD14    | IRF1    |
| 1  | chr1_7997760    | 2  | chr2_102955683  | 0.1833 | 7.859 | 0.005057 | IL1RL1    | TNFRSF9 |
| 1  | chr1_67633930   | 5  | chr5_96139250   | 0.4992 | 7.859 | 0.005058 | ERAP1     | IL23R   |
| 5  | chr5_96249323   | 18 | chr18_13050127  | 7.113  | 7.859 | 0.005058 | CEP192    | ERAP2   |
| 12 | chr12_6636392   | 17 | chr17_38073341  | 6.442  | 7.858 | 0.00506  | GSDMB     | NCAPD2  |
| 2  | chr2_102997884  | 17 | chr17_38029120  | 0.8616 | 7.857 | 0.005063 | IL18R1    | ZPBP2   |
| 1  | chr1_78433350   | 1  | chr1_152770521  | 0.2355 | 7.856 | 0.005066 | FUBP1     | LCE1D   |
| 12 | chr12_112499067 | 17 | chr17_78178170  | 6.334  | 7.854 | 0.005072 | CARD14    | NAA25   |
| 1  | chr1_206972365  | 2  | chr2_102967928  | 6.33   | 7.853 | 0.005074 | IL19      | IL1RL1  |
| 2  | chr2_103006448  | 20 | chr20_48497562  | 3.012  | 7.852 | 0.005076 | IL18R1    | SLC9A8  |
| 2  | chr2_103006448  | 4  | chr4_103514445  | 0.89   | 7.85  | 0.005081 | IL18R1    | NFKB1   |
| 2  | chr2_103095494  | 5  | chr5_96116995   | 4.408  | 7.849 | 0.005086 | ERAP1     | SLC9A4  |
| 7  | chr7_37053051   | 19 | chr19_10472933  | 0.3142 | 7.848 | 0.005087 | ELMO1-AS1 | TYK2    |
| 12 | chr12_112499067 | 17 | chr17_78178189  | 0.158  | 7.848 | 0.005088 | CARD14    | NAA25   |
| 2  | chr2_102644675  | 5  | chr5_96117300   | 3.239  | 7.848 | 0.005089 | ERAP1     | IL1R2   |
| 2  | chr2_103120245  | 19 | chr19_49206631  | 0.2144 | 7.847 | 0.005092 | FUT2      | SLC9A4  |
| 5  | chr5_96132795   | 12 | chr12_10251227  | 0.2796 | 7.841 | 0.005108 | CLEC1A    | ERAP1   |
| 1  | chr1_207015917  | 21 | chr21_34954851  | 3.398  | 7.839 | 0.005113 | DONSON    | IL19    |
| 1  | chr1_7909774    | 2  | chr2_61108996   | 0.1571 | 7.833 | 0.005129 | REL       | UTS2    |
| 1  | chr1_159002594  | 17 | chr17_73871467  | 3.267  | 7.833 | 0.00513  | IFI16     | TRIM47  |
| 2  | chr2_102968007  | 12 | chr12_6623942   | 0.1908 | 7.832 | 0.005132 | IL1RL1    | NCAPD2  |
| 2  | chr2_103039873  | 17 | chr17_77753128  | 23.06  | 7.831 | 0.005136 | CBX2      | IL18RAP |

|    |                 |    |                 |        |       |          |          |          |
|----|-----------------|----|-----------------|--------|-------|----------|----------|----------|
| 5  | chr5_96121183   | 5  | chr5_96237114   | 1.215  | 7.829 | 0.005141 | ERAP1    | ERAP2    |
| 10 | chr10_102116399 | 20 | chr20_48524827  | 0.304  | 7.829 | 0.005142 | SCD      | SPATA2   |
| 2  | chr2_103006387  | 2  | chr2_103130373  | 1.213  | 7.829 | 0.005142 | IL18R1   | SLC9A4   |
| 2  | chr2_103040177  | 17 | chr17_38029120  | 0.8806 | 7.827 | 0.005147 | IL18RAP  | ZBP2     |
| 5  | chr5_96252998   | 17 | chr17_26125933  | 0.2133 | 7.827 | 0.005147 | ERAP2    | NOS2     |
| 2  | chr2_61390334   | 12 | chr12_6483851   | 6.029  | 7.826 | 0.005151 | C2orf74  | SCNN1A   |
| 4  | chr4_103537442  | 5  | chr5_150846896  | 0.2403 | 7.823 | 0.005159 | NFKB1    | SLC36A1  |
| 12 | chr12_111923656 | 17 | chr17_78178189  | 3.508  | 7.822 | 0.005162 | ATXN2    | CARD14   |
| 1  | chr1_172633592  | 2  | chr2_103011237  | 2.436  | 7.821 | 0.005165 | FASLG    | IL18R1   |
| 16 | chr16_10992624  | 20 | chr20_48522585  | 2.897  | 7.82  | 0.005167 | CIITA    | SPATA2   |
| 5  | chr5_96132795   | 6  | chr6_138196026  | 0.1962 | 7.819 | 0.00517  | ERAP1    | TNFAIP3  |
| 1  | chr1_12387829   | 17 | chr17_40481529  | 9.034  | 7.817 | 0.005176 | STAT3    | VPS13D   |
| 2  | chr2_163136727  | 12 | chr12_6131085   | 4.118  | 7.815 | 0.005181 | IFIH1    | VWF      |
| 5  | chr5_79741181   | 5  | chr5_96124296   | 25.76  | 7.814 | 0.005183 | ERAP1    | ZFYVE16  |
| 5  | chr5_96112272   | 17 | chr17_73871467  | 2.895  | 7.813 | 0.005187 | ERAP1    | TRIM47   |
| 5  | chr5_131825142  | 14 | chr14_35761675  | 2.26   | 7.813 | 0.005188 | IRF1     | PSMA6    |
| 1  | chr1_234565787  | 3  | chr3_121646806  | 0.8108 | 7.812 | 0.005191 | SLC15A2  | TARBP1   |
| 19 | chr19_10108861  | 19 | chr19_49230664  | 0.2736 | 7.811 | 0.005192 | COL5A3   | RASIP1   |
| 1  | chr1_152552160  | 17 | chr17_38063381  | 2.181  | 7.81  | 0.005196 | GSDMB    | LCE3D    |
| 5  | chr5_96509055   | 17 | chr17_26125933  | 3.825  | 7.809 | 0.005198 | NOS2     | RIOK2    |
| 3  | chr3_121810304  | 17 | chr17_78171944  | 0.153  | 7.809 | 0.005199 | CARD14   | CD86     |
| 12 | chr12_56437315  | 17 | chr17_38063381  | 2.584  | 7.808 | 0.0052   | GSDMB    | RPS26    |
| 2  | chr2_103120245  | 19 | chr19_10472933  | 5.845  | 7.805 | 0.005211 | SLC9A4   | TYK2     |
| 2  | chr2_102968362  | 17 | chr17_38173143  | 0.8868 | 7.805 | 0.005212 | CSF3     | IL1RL1   |
| 5  | chr5_96124447   | 10 | chr10_80976056  | 4.445  | 7.804 | 0.005212 | ERAP1    | ZMIZ1    |
| 5  | chr5_96222183   | 19 | chr19_10112594  | 2.269  | 7.8   | 0.005223 | COL5A3   | ERAP2    |
| 17 | chr17_37985647  | 17 | chr17_40459737  | 2.919  | 7.8   | 0.005225 | IKZF3    | STAT5A   |
| 17 | chr17_40497728  | 19 | chr19_10108850  | 6.385  | 7.8   | 0.005225 | COL5A3   | STAT3    |
| 2  | chr2_163149896  | 16 | chr16_31372344  | 6.34   | 7.797 | 0.005234 | IFIH1    | ITGAX    |
| 2  | chr2_102998279  | 3  | chr3_121649809  | 2.955  | 7.796 | 0.005238 | IL18R1   | SLC15A2  |
| 2  | chr2_102968356  | 18 | chr18_12978733  | 1.173  | 7.794 | 0.005241 | IL1RL1   | SEH1L    |
| 1  | chr1_152282229  | 5  | chr5_150443005  | 0.272  | 7.791 | 0.005251 | FLG      | TNIP1    |
| 1  | chr1_158943521  | 2  | chr2_102641201  | 4.561  | 7.788 | 0.00526  | IL1R2    | PYHIN1   |
| 1  | chr1_234573171  | 2  | chr2_61239020   | 2.406  | 7.787 | 0.005264 | PUS10    | TARBP1   |
| 10 | chr10_101934235 | 19 | chr19_10091419  | 13.56  | 7.786 | 0.005265 | COL5A3   | ERLIN1   |
| 2  | chr2_163137695  | 12 | chr12_112479891 | 0.2562 | 7.786 | 0.005266 | IFIH1    | NAA25    |
| 2  | chr2_102641201  | 11 | chr11_9850990   | 3.277  | 7.785 | 0.005267 | IL1R2    | SBF2     |
| 14 | chr14_35783677  | 19 | chr19_10475652  | 3.991  | 7.785 | 0.005268 | PSMA6    | TYK2     |
| 2  | chr2_102984671  | 17 | chr17_40481596  | 0.4865 | 7.785 | 0.005269 | IL18R1   | STAT3    |
| 2  | chr2_103040945  | 9  | chr9_32631785   | 0.5018 | 7.782 | 0.005276 | IL18RAP  | TAF1L    |
| 1  | chr1_158990412  | 17 | chr17_38153711  | 2.946  | 7.777 | 0.005291 | IFI16    | PSMD3    |
| 1  | chr1_158987941  | 19 | chr19_10081322  | 1.395  | 7.775 | 0.005297 | COL5A3   | IFI16    |
| 1  | chr1_206239427  | 2  | chr2_62728105   | 0.1261 | 7.773 | 0.005304 | C1orf186 | TMEM17   |
| 2  | chr2_102965372  | 17 | chr17_78178189  | 2.541  | 7.771 | 0.005308 | CARD14   | IL1RL1   |
| 2  | chr2_103040177  | 11 | chr11_128354978 | 5.479  | 7.767 | 0.00532  | ETS1     | IL18RAP  |
| 2  | chr2_103040182  | 19 | chr19_10097373  | 3.53   | 7.766 | 0.005325 | COL5A3   | IL18RAP  |
| 12 | chr12_56537021  | 19 | chr19_10114033  | 3.007  | 7.765 | 0.005327 | COL5A3   | ESYT1    |
| 1  | chr1_207010411  | 16 | chr16_31095251  | 11.58  | 7.764 | 0.005328 | IL19     | PRSS53   |
| 17 | chr17_26094735  | 17 | chr17_78180618  | 0.2463 | 7.764 | 0.005329 | CARD14   | NOS2     |
| 5  | chr5_96222183   | 11 | chr11_9817519   | 4.779  | 7.761 | 0.005338 | ERAP2    | SBF2-AS1 |
| 1  | chr1_24495839   | 2  | chr2_102968211  | 0.5454 | 7.757 | 0.005349 | IFNLR1   | IL1RL1   |
| 12 | chr12_6464809   | 12 | chr12_56740176  | 10.08  | 7.757 | 0.00535  | SCNN1A   | STAT2    |
| 1  | chr1_152760075  | 16 | chr16_11141179  | 0.1855 | 7.754 | 0.005358 | CLEC16A  | LCE1E    |
| 5  | chr5_158750013  | 17 | chr17_73873127  | 3.761  | 7.754 | 0.005359 | IL12B    | TRIM47   |
| 12 | chr12_6495275   | 18 | chr18_61652376  | 5.3    | 7.75  | 0.005371 | LTBR     | SERPINB8 |
| 1  | chr1_206944791  | 5  | chr5_96118852   | 0.1368 | 7.749 | 0.005374 | ERAP1    | IL10     |
| 3  | chr3_121810654  | 18 | chr18_12978733  | 3.654  | 7.749 | 0.005374 | CD86     | SEH1L    |
| 1  | chr1_158986225  | 16 | chr16_31332719  | 0.2815 | 7.749 | 0.005375 | IFI16    | ITGAM    |
| 12 | chr12_111895203 | 21 | chr21_34876817  | 7.523  | 7.747 | 0.00538  | ATXN2    | GART     |
| 10 | chr10_101934235 | 12 | chr12_122720489 | 7.215  | 7.743 | 0.005393 | ERLIN1   | VPS33A   |
| 4  | chr4_103488346  | 17 | chr17_78178182  | 2.94   | 7.742 | 0.005394 | CARD14   | NFKB1    |
| 10 | chr10_81065840  | 18 | chr18_12979041  | 0.4048 | 7.741 | 0.005397 | SEH1L    | ZMIZ1    |
| 6  | chr6_405088     | 12 | chr12_6500105   | 0.36   | 7.742 | 0.005397 | IRF4     | LTBR     |
| 2  | chr2_102955683  | 3  | chr3_121507383  | 11.07  | 7.739 | 0.005405 | IL1RL1   | IQCB1    |

|    |                |    |                 |         |       |          |               |                        |
|----|----------------|----|-----------------|---------|-------|----------|---------------|------------------------|
| 10 | chr10_89469017 | 18 | chr18_12984340  | 0.1967  | 7.738 | 0.005408 | PAPSS2        | SEH1L                  |
| 14 | chr14_35761592 | 20 | chr20_48467560  | 1.256   | 7.738 | 0.005409 | PSMA6         | SLC9A8                 |
| 10 | chr10_81058027 | 16 | chr16_30936081  | 0.8245  | 7.737 | 0.005411 | FBXL19        | ZMIZ1                  |
| 1  | chr1_158990412 | 6  | chr6_111912800  | 2.37    | 7.736 | 0.005412 | IFI16         | TRAF3IP2               |
| 2  | chr2_102968362 | 11 | chr11_64003792  | 8.296   | 7.735 | 0.005415 | IL1RL1        | VEGFB                  |
| 1  | chr1_8074305   | 19 | chr19_10104154  | 3.702   | 7.734 | 0.005418 | COL5A3        | ERRFI1                 |
| 1  | chr1_8422806   | 17 | chr17_38153554  | 3.318   | 7.731 | 0.005427 | PSMD3         | RERE                   |
| 12 | chr12_6495275  | 12 | chr12_56495532  | 0.04948 | 7.732 | 0.005427 | ERBB3         | LTBR                   |
| 2  | chr2_163291617 | 5  | chr5_96251428   | 0.5211  | 7.73  | 0.005432 | ERAP2         | KCNH7                  |
| 1  | chr1_207009910 | 5  | chr5_40269842   | 3.701   | 7.728 | 0.005437 | IL19          | LINC00603, PTGER4      |
| 17 | chr17_40481721 | 19 | chr19_10114033  | 2.027   | 7.728 | 0.005438 | COL5A3        | STAT3                  |
| 2  | chr2_102968211 | 11 | chr11_64003792  | 8.118   | 7.727 | 0.005442 | IL1RL1        | VEGFB                  |
| 2  | chr2_62728046  | 19 | chr19_10813064  | 0.3199  | 7.726 | 0.005442 | QTRT1         | TMEM17                 |
| 5  | chr5_96124447  | 10 | chr10_75157049  | 5.874   | 7.726 | 0.005443 | ANXA7         | ERAP1                  |
| 3  | chr3_121810428 | 19 | chr19_10114033  | 0.3167  | 7.724 | 0.005451 | CD86          | COL5A3                 |
| 1  | chr1_234573171 | 19 | chr19_53456074  | 0.163   | 7.722 | 0.005454 | TARBP1        | ZNF816, ZNF816-ZNF321P |
| 2  | chr2_102641201 | 5  | chr5_79374474   | 0.4049  | 7.722 | 0.005455 | CTD-2201118.1 | IL1R2                  |
| 5  | chr5_96509055  | 22 | chr22_22160172  | 8.098   | 7.719 | 0.005464 | MAPK1         | RIOK2                  |
| 1  | chr1_152760075 | 4  | chr4_103537729  | 0.1691  | 7.718 | 0.005468 | LCE1E         | NFKB1                  |
| 2  | chr2_102960007 | 12 | chr12_56480404  | 0.0966  | 7.718 | 0.005469 | ERBB3         | IL1RL1                 |
| 12 | chr12_6204841  | 17 | chr17_78178182  | 2.457   | 7.717 | 0.005471 | CARD14        | VWF                    |
| 17 | chr17_74288578 | 17 | chr17_78180618  | 0.3071  | 7.717 | 0.005471 | CARD14        | QRICH2                 |
| 4  | chr4_103594918 | 10 | chr10_75136022  | 0.169   | 7.713 | 0.005482 | ANXA7         | MANBA                  |
| 5  | chr5_96124296  | 17 | chr17_40475777  | 6.402   | 7.711 | 0.005489 | ERAP1         | STAT3                  |
| 2  | chr2_103011237 | 5  | chr5_132036004  | 0.2363  | 7.711 | 0.00549  | IL18R1        | KIF3A                  |
| 1  | chr1_206943265 | 5  | chr5_158750013  | 0.4078  | 7.709 | 0.005494 | IL10          | IL12B                  |
| 1  | chr1_158986477 | 17 | chr17_26101328  | 2.29    | 7.708 | 0.005496 | IFI16         | NOS2                   |
| 11 | chr11_9878207  | 21 | chr21_34876708  | 2.558   | 7.706 | 0.005503 | GART          | SBF2                   |
| 1  | chr1_152659194 | 5  | chr5_150496853  | 0.5947  | 7.705 | 0.005505 | ANXA6         | LCE2B                  |
| 2  | chr2_102968362 | 17 | chr17_38153554  | 0.8888  | 7.703 | 0.005512 | IL1RL1        | PSMD3                  |
| 17 | chr17_40481641 | 19 | chr19_10104272  | 2.306   | 7.703 | 0.005514 | COL5A3        | STAT3                  |
| 1  | chr1_207009910 | 16 | chr16_11154878  | 0.1907  | 7.699 | 0.005524 | CLEC16A       | IL19                   |
| 5  | chr5_79374668  | 19 | chr19_10464687  | 2.028   | 7.697 | 0.005532 | CTD-2201118.1 | TYK2                   |
| 1  | chr1_158987941 | 11 | chr11_66083196  | 0.2559  | 7.696 | 0.005534 | CD248         | IFI16                  |
| 1  | chr1_234563556 | 2  | chr2_61239020   | 2.425   | 7.696 | 0.005534 | PUS10         | TARBP1                 |
| 5  | chr5_158705065 | 17 | chr17_26089891  | 0.1909  | 7.696 | 0.005534 | NOS2          | UBLCP1                 |
| 9  | chr9_32634519  | 12 | chr12_6562768   | 0.1186  | 7.695 | 0.005537 | TAF1L         | TAPBP1                 |
| 17 | chr17_40716235 | 19 | chr19_49693774  | 0.307   | 7.695 | 0.005539 | COASY         | TRPM4                  |
| 1  | chr1_207014445 | 2  | chr2_103040945  | 4.825   | 7.694 | 0.005542 | IL18RAP       | IL19                   |
| 16 | chr16_31282351 | 17 | chr17_40481529  | 5.81    | 7.69  | 0.005553 | ITGAM         | STAT3                  |
| 4  | chr4_103459060 | 17 | chr17_26116896  | 0.2016  | 7.69  | 0.005553 | NFKB1         | NOS2                   |
| 5  | chr5_96513471  | 11 | chr11_128426299 | 4.399   | 7.689 | 0.005555 | ETS1          | RIOK2                  |
| 12 | chr12_6626369  | 20 | chr20_48522717  | 0.2112  | 7.688 | 0.005559 | NCAPD2        | SPATA2                 |
| 1  | chr1_158990412 | 5  | chr5_131726566  | 1.809   | 7.688 | 0.00556  | IFI16         | SLC22A5                |
| 5  | chr5_150496924 | 16 | chr16_31095204  | 1.548   | 7.687 | 0.005562 | ANXA6         | PRSS53                 |
| 1  | chr1_206945718 | 17 | chr17_40716235  | 0.3628  | 7.687 | 0.005563 | COASY         | IL10                   |
| 3  | chr3_121647656 | 16 | chr16_31286874  | 4.905   | 7.685 | 0.005567 | ITGAM         | SLC15A2                |
| 2  | chr2_102968362 | 17 | chr17_38024626  | 0.8779  | 7.683 | 0.005573 | IL1RL1        | ZPBP2                  |
| 7  | chr7_36901278  | 19 | chr19_49206631  | 7.224   | 7.684 | 0.005573 | ELMO1         | FUT2                   |
| 12 | chr12_6924180  | 17 | chr17_73871467  | 0.08269 | 7.682 | 0.005578 | CD4           | TRIM47                 |
| 1  | chr1_12249031  | 17 | chr17_37985772  | 2.359   | 7.68  | 0.005585 | IKZF3         | TNFRSF1B               |
| 2  | chr2_103006387 | 10 | chr10_89469116  | 0.2435  | 7.679 | 0.005587 | IL18R1        | PAPSS2                 |
| 2  | chr2_163136771 | 17 | chr17_40716235  | 1.147   | 7.678 | 0.005589 | COASY         | IFIH1                  |
| 12 | chr12_6500105  | 19 | chr19_49300625  | 11.11   | 7.678 | 0.00559  | BCAT2         | LTBR                   |
| 6  | chr6_138192745 | 19 | chr19_10096538  | 6.379   | 7.676 | 0.005597 | COL5A3        | TNFAIP3                |
| 10 | chr10_81058027 | 19 | chr19_49206631  | 1.101   | 7.675 | 0.0056   | FUT2          | ZMIZ1                  |
| 1  | chr1_152329369 | 19 | chr19_53456074  | 0.1581  | 7.674 | 0.005601 | FLG2          | ZNF816, ZNF816-ZNF321P |
| 1  | chr1_159002778 | 12 | chr12_112471183 | 0.3223  | 7.673 | 0.005604 | IFI16         | NAA25                  |
| 1  | chr1_158986477 | 17 | chr17_38079498  | 4.307   | 7.673 | 0.005606 | IFI16         | ORMDL3                 |
| 1  | chr1_159023338 | 5  | chr5_96121715   | 2.581   | 7.673 | 0.005606 | ERAP1         | IFI16                  |
| 5  | chr5_96129512  | 5  | chr5_131825142  | 0.3865  | 7.672 | 0.005609 | ERAP1         | IRF1                   |
| 5  | chr5_96222183  | 19 | chr19_10226273  | 2.626   | 7.672 | 0.005609 | EIF3G         | ERAP2                  |
| 2  | chr2_103040177 | 17 | chr17_38031714  | 0.8797  | 7.671 | 0.005612 | IL18RAP       | ZPBP2                  |
| 5  | chr5_96121994  | 9  | chr9_32631356   | 3.528   | 7.671 | 0.005612 | ERAP1         | TAF1L                  |

|    |                 |    |                |         |       |          |          |         |
|----|-----------------|----|----------------|---------|-------|----------|----------|---------|
| 7  | chr7_37311496   | 19 | chr19_10464687 | 0.2838  | 7.671 | 0.005612 | ELM01    | TYK2    |
| 2  | chr2_103059664  | 17 | chr17_40481529 | 2.347   | 7.67  | 0.005614 | IL18RAP  | STAT3   |
| 5  | chr5_96121715   | 10 | chr10_75157049 | 5.836   | 7.67  | 0.005614 | ANXA7    | ERAP1   |
| 1  | chr1_206972365  | 2  | chr2_102968362 | 6.217   | 7.669 | 0.005618 | IL19     | IL1RL1  |
| 19 | chr19_10083664  | 20 | chr20_48599549 | 0.5617  | 7.669 | 0.005618 | COL5A3   | SNAI1   |
| 1  | chr1_67889571   | 6  | chr6_397235    | 0.2051  | 7.668 | 0.005621 | IRF4     | SERBP1  |
| 1  | chr1_152671463  | 11 | chr11_65601560 | 0.09427 | 7.666 | 0.005627 | LCE2A    | SNX32   |
| 2  | chr2_102957348  | 5  | chr5_96116995  | 4.247   | 7.665 | 0.00563  | ERAP1    | IL1RL1  |
| 3  | chr3_45187671   | 12 | chr12_10251227 | 3.949   | 7.665 | 0.005631 | CDCP1    | CLEC1A  |
| 1  | chr1_67889571   | 1  | chr1_207078526 | 3.796   | 7.664 | 0.005635 | FCMR     | SERBP1  |
| 2  | chr2_103039873  | 19 | chr19_10097373 | 3.501   | 7.663 | 0.005636 | COL5A3   | IL18RAP |
| 1  | chr1_67845536   | 2  | chr2_102955683 | 0.2212  | 7.663 | 0.005637 | IL12RB2  | IL1RL1  |
| 2  | chr2_103125466  | 16 | chr16_31434453 | 0.203   | 7.663 | 0.005638 | ITGAD    | SLC9A4  |
| 11 | chr11_10015551  | 17 | chr17_40459737 | 5.752   | 7.659 | 0.00565  | SBF2     | STAT5A  |
| 10 | chr10_101934235 | 12 | chr12_6562768  | 0.7697  | 7.658 | 0.005651 | ERLIN1   | TAPBP1  |
| 2  | chr2_163137683  | 16 | chr16_31485639 | 0.2543  | 7.658 | 0.005653 | IFIH1    | TGFB1I1 |
| 10 | chr10_81056383  | 12 | chr12_56477859 | 0.3232  | 7.656 | 0.005657 | ERBB3    | ZMIZ1   |
| 3  | chr3_101576077  | 19 | chr19_53454387 | 18.18   | 7.656 | 0.005658 | NFKBIZ   | ZNF816  |
| 9  | chr9_32629967   | 17 | chr17_73888354 | 3.824   | 7.656 | 0.005658 | TAF1L    | TRIM65  |
| 1  | chr1_152595565  | 5  | chr5_96125910  | 0.5289  | 7.653 | 0.005667 | ERAP1    | LCE3A   |
| 2  | chr2_102967928  | 4  | chr4_103514445 | 0.8903  | 7.653 | 0.005668 | IL1RL1   | NFKB1   |
| 1  | chr1_67685363   | 12 | chr12_6483851  | 0.08292 | 7.652 | 0.005672 | IL23R    | SCNN1A  |
| 2  | chr2_103040182  | 17 | chr17_38031714 | 0.8605  | 7.65  | 0.005677 | IL18RAP  | ZBP2    |
| 1  | chr1_207009910  | 2  | chr2_163136603 | 2.265   | 7.649 | 0.00568  | IFIH1    | IL19    |
| 5  | chr5_79770655   | 5  | chr5_96121069  | 3.089   | 7.649 | 0.005681 | ERAP1    | ZFYVE16 |
| 5  | chr5_96118852   | 10 | chr10_80976056 | 4.913   | 7.649 | 0.005681 | ERAP1    | ZMIZ1   |
| 2  | chr2_61413625   | 17 | chr17_73888354 | 9.107   | 7.647 | 0.005686 | AHSA2    | TRIM65  |
| 10 | chr10_81060474  | 12 | chr12_10251227 | 0.3515  | 7.646 | 0.00569  | CLEC1A   | ZMIZ1   |
| 2  | chr2_103125457  | 12 | chr12_6619334  | 1.938   | 7.646 | 0.005691 | NCAPD2   | SLC9A4  |
| 1  | chr1_152760075  | 10 | chr10_81049583 | 3.848   | 7.645 | 0.005693 | LCE1E    | ZMIZ1   |
| 1  | chr1_206972365  | 5  | chr5_96129512  | 2.835   | 7.645 | 0.005694 | ERAP1    | IL19    |
| 1  | chr1_67155976   | 2  | chr2_103090127 | 0.2347  | 7.643 | 0.005698 | SGIP1    | SLC9A4  |
| 5  | chr5_96232222   | 16 | chr16_31272988 | 2.452   | 7.642 | 0.005703 | ERAP2    | ITGAM   |
| 2  | chr2_103125466  | 10 | chr10_81060474 | 1.101   | 7.642 | 0.005704 | SLC9A4   | ZMIZ1   |
| 5  | chr5_96222185   | 16 | chr16_31272988 | 2.588   | 7.641 | 0.005705 | ERAP2    | ITGAM   |
| 1  | chr1_152276618  | 1  | chr1_234563556 | 6.2     | 7.64  | 0.00571  | FLG      | TARBP1  |
| 5  | chr5_96222183   | 6  | chr6_138539306 | 2.356   | 7.64  | 0.00571  | ERAP2    | PBOV1   |
| 2  | chr2_102998279  | 11 | chr11_64003792 | 8.019   | 7.637 | 0.005719 | IL18R1   | VEGFB   |
| 5  | chr5_96117300   | 10 | chr10_75157049 | 7.099   | 7.637 | 0.005719 | ANXA7    | ERAP1   |
| 2  | chr2_62733253   | 11 | chr11_9803114  | 2.146   | 7.634 | 0.005727 | SBF2     | TMEM17  |
| 17 | chr17_76115583  | 20 | chr20_48522585 | 0.115   | 7.633 | 0.00573  | SPATA2   | TMC6    |
| 1  | chr1_158990412  | 17 | chr17_26115966 | 0.3391  | 7.633 | 0.005731 | IFI16    | NOS2    |
| 1  | chr1_67838353   | 10 | chr10_90034899 | 0.3176  | 7.631 | 0.005739 | IL12RB2  | RNLS    |
| 17 | chr17_40459737  | 17 | chr17_73752557 | 0.2682  | 7.63  | 0.00574  | ITGB4    | STAT5A  |
| 2  | chr2_103125457  | 17 | chr17_73752358 | 0.1701  | 7.629 | 0.005745 | ITGB4    | SLC9A4  |
| 2  | chr2_61108996   | 3  | chr3_44692461  | 13.3    | 7.629 | 0.005745 | REL      | ZNF35   |
| 3  | chr3_101574738  | 17 | chr17_73888273 | 12.31   | 7.628 | 0.005746 | NFKBIZ   | TRIM65  |
| 2  | chr2_103006448  | 10 | chr10_89472846 | 9.647   | 7.628 | 0.005747 | IL18R1   | PAPSS2  |
| 1  | chr1_8075575    | 4  | chr4_103557251 | 2.888   | 7.628 | 0.005748 | ERRFI1   | MANBA   |
| 6  | chr6_138196059  | 19 | chr19_10464687 | 0.5031  | 7.628 | 0.005748 | TNFAIP3  | TYK2    |
| 1  | chr1_234546228  | 19 | chr19_10104154 | 5.633   | 7.627 | 0.005751 | COL5A3   | TARBP1  |
| 2  | chr2_102644675  | 5  | chr5_96129512  | 3.089   | 7.626 | 0.005753 | ERAP1    | IL1R2   |
| 2  | chr2_102997884  | 17 | chr17_38024626 | 0.8608  | 7.626 | 0.005753 | IL18R1   | ZBP2    |
| 1  | chr1_206239427  | 18 | chr18_12978733 | 6.749   | 7.626 | 0.005754 | C1orf186 | SEH1L   |
| 1  | chr1_67155976   | 2  | chr2_103040945 | 0.2351  | 7.626 | 0.005754 | IL18RAP  | SGIP1   |
| 17 | chr17_73515172  | 17 | chr17_78178830 | 2.524   | 7.626 | 0.005754 | CARD14   | TSEN54  |
| 1  | chr1_172633592  | 2  | chr2_102997884 | 2.999   | 7.625 | 0.005756 | FASLG    | IL18R1  |
| 2  | chr2_163149896  | 5  | chr5_96222496  | 0.1477  | 7.625 | 0.005757 | ERAP2    | IFIH1   |
| 1  | chr1_152681704  | 18 | chr18_12984340 | 2.352   | 7.624 | 0.00576  | LCE4A    | SEH1L   |
| 16 | chr16_10992624  | 20 | chr20_48524827 | 2.869   | 7.623 | 0.005762 | CIITA    | SPATA2  |
| 1  | chr1_234565787  | 12 | chr12_56336054 | 2.985   | 7.623 | 0.005763 | DGKA     | TARBP1  |
| 11 | chr11_9457738   | 19 | chr19_10464687 | 4.614   | 7.623 | 0.005763 | IPO7     | TYK2    |
| 12 | chr12_56737245  | 16 | chr16_30938811 | 0.1488  | 7.623 | 0.005763 | FBXL19   | STAT2   |
| 1  | chr1_159002222  | 8  | chr8_3432634   | 0.208   | 7.622 | 0.005765 | CSMD1    | IFI16   |

|    |                |    |                |         |       |          |         |                        |
|----|----------------|----|----------------|---------|-------|----------|---------|------------------------|
| 2  | chr2_102641201 | 16 | chr16_31282433 | 0.266   | 7.622 | 0.005765 | IL1R2   | ITGAM                  |
| 11 | chr11_63919916 | 19 | chr19_10104154 | 7.318   | 7.622 | 0.005766 | COL5A3  | MACROD1                |
| 14 | chr14_35761592 | 16 | chr16_31288280 | 9.358   | 7.622 | 0.005767 | ITGAM   | PSMA6                  |
| 1  | chr1_24082393  | 19 | chr19_49206631 | 0.1726  | 7.621 | 0.005769 | FUT2    | TCEB3                  |
| 1  | chr1_67666705  | 5  | chr5_96119546  | 0.2436  | 7.621 | 0.005769 | ERAP1   | IL23R                  |
| 1  | chr1_234565787 | 19 | chr19_53456074 | 0.1616  | 7.621 | 0.00577  | TARBP1  | ZNF816, ZNF816-ZNF321P |
| 6  | chr6_138192745 | 19 | chr19_49230664 | 6.78    | 7.621 | 0.005771 | RASIP1  | TNFAIP3                |
| 9  | chr9_32974535  | 19 | chr19_10108850 | 0.2917  | 7.62  | 0.005773 | APTX    | COL5A3                 |
| 5  | chr5_96125910  | 13 | chr13_40251725 | 0.2422  | 7.619 | 0.005777 | COG6    | ERAP1                  |
| 5  | chr5_132051497 | 13 | chr13_20763612 | 0.04758 | 7.617 | 0.005781 | GJB2    | KIF3A                  |
| 17 | chr17_40939982 | 20 | chr20_48524827 | 3.635   | 7.617 | 0.005783 | SPATA2  | WNK4                   |
| 2  | chr2_62733253  | 16 | chr16_11363087 | 3.14    | 7.613 | 0.005794 | TMEM17  | TNP2                   |
| 16 | chr16_11363064 | 20 | chr20_48522585 | 4.733   | 7.613 | 0.005796 | SPATA2  | TNP2                   |
| 12 | chr12_6483463  | 18 | chr18_12979041 | 0.8612  | 7.612 | 0.005799 | SCNN1A  | SEH1L                  |
| 1  | chr1_159002222 | 16 | chr16_31332719 | 0.3075  | 7.611 | 0.005801 | IFI16   | ITGAM                  |
| 11 | chr11_64543820 | 16 | chr16_31095204 | 0.276   | 7.61  | 0.005803 | PRSS53  | SF1                    |
| 1  | chr1_152283119 | 2  | chr2_102955683 | 4.48    | 7.608 | 0.005812 | FLG     | IL1RL1                 |
| 2  | chr2_102997884 | 5  | chr5_96116995  | 4.224   | 7.607 | 0.005814 | ERAP1   | IL18R1                 |
| 2  | chr2_163228440 | 21 | chr21_34876708 | 6.525   | 7.607 | 0.005814 | GART    | KCNH7                  |
| 5  | chr5_158750013 | 12 | chr12_56525038 | 3.014   | 7.606 | 0.005819 | ESYT1   | IL12B                  |
| 1  | chr1_234565787 | 10 | chr10_81058144 | 3.917   | 7.604 | 0.005822 | TARBP1  | ZMIZ1                  |
| 3  | chr3_121649809 | 17 | chr17_26084532 | 2.509   | 7.604 | 0.005825 | NOS2    | SLC15A2                |
| 4  | chr4_103534560 | 18 | chr18_61652376 | 0.3884  | 7.603 | 0.005826 | NFKB1   | SERPINB8               |
| 3  | chr3_121646666 | 17 | chr17_78178170 | 0.1983  | 7.603 | 0.005828 | CARD14  | SLC15A2                |
| 2  | chr2_103040177 | 12 | chr12_56482032 | 7.263   | 7.602 | 0.005829 | ERBB3   | IL18RAP                |
| 1  | chr1_67648502  | 19 | chr19_10108850 | 4.693   | 7.6   | 0.005837 | COL5A3  | IL23R                  |
| 5  | chr5_96124296  | 20 | chr20_48481366 | 3.83    | 7.598 | 0.005843 | ERAP1   | SLC9A8                 |
| 2  | chr2_163149896 | 5  | chr5_150704758 | 1.765   | 7.598 | 0.005844 | IFIH1   | SLC36A2                |
| 1  | chr1_207013389 | 5  | chr5_158750013 | 0.2552  | 7.597 | 0.005845 | IL12B   | IL19                   |
| 2  | chr2_163123888 | 19 | chr19_10472933 | 0.1826  | 7.597 | 0.005847 | IFIH1   | TYK2                   |
| 5  | chr5_96252998  | 6  | chr6_138196026 | 2.726   | 7.596 | 0.00585  | ERAP2   | TNFAIP3                |
| 1  | chr1_172633592 | 2  | chr2_102957348 | 2.998   | 7.595 | 0.005852 | FASLG   | IL1RL1                 |
| 5  | chr5_96509055  | 6  | chr6_398780    | 3.087   | 7.595 | 0.005853 | IRF4    | RIOK2                  |
| 17 | chr17_76425289 | 19 | chr19_10114033 | 0.2605  | 7.594 | 0.005855 | COL5A3  | DNAH17                 |
| 2  | chr2_103040945 | 2  | chr2_103095494 | 1.218   | 7.594 | 0.005856 | IL18RAP | SLC9A4                 |
| 19 | chr19_10083664 | 19 | chr19_10475652 | 1.839   | 7.592 | 0.005864 | COL5A3  | TYK2                   |
| 3  | chr3_121658343 | 5  | chr5_96249323  | 4.078   | 7.59  | 0.005869 | ERAP2   | SLC15A2                |
| 1  | chr1_152733376 | 16 | chr16_31388246 | 19.96   | 7.59  | 0.00587  | ITGAX   | KPRP                   |
| 1  | chr1_159002778 | 10 | chr10_75214255 | 0.2479  | 7.59  | 0.00587  | IFI16   | PPP3CB                 |
| 2  | chr2_61149014  | 17 | chr17_40716235 | 2.658   | 7.589 | 0.005874 | COASY   | REL                    |
| 1  | chr1_67838353  | 5  | chr5_96232222  | 2.461   | 7.588 | 0.005877 | ERAP2   | IL12RB2                |
| 1  | chr1_158987941 | 3  | chr3_121659930 | 1.34    | 7.587 | 0.005878 | IFI16   | SLC15A2                |
| 2  | chr2_163136771 | 17 | chr17_26084296 | 3.134   | 7.586 | 0.005883 | IFIH1   | NOS2                   |
| 2  | chr2_62096845  | 2  | chr2_62728105  | 6.168   | 7.586 | 0.005883 | CCT4    | TMEM17                 |
| 2  | chr2_102641201 | 17 | chr17_78222239 | 2.7     | 7.585 | 0.005884 | IL1R2   | SLC26A11               |
| 2  | chr2_103011237 | 12 | chr12_56482032 | 7.246   | 7.585 | 0.005884 | ERBB3   | IL18R1                 |
| 4  | chr4_103557219 | 5  | chr5_96339273  | 1.096   | 7.585 | 0.005886 | LNPEP   | MANBA                  |
| 2  | chr2_102968211 | 18 | chr18_12978733 | 1.175   | 7.584 | 0.00589  | IL1RL1  | SEH1L                  |
| 1  | chr1_207013378 | 5  | chr5_96118852  | 4.515   | 7.583 | 0.005894 | ERAP1   | IL19                   |
| 2  | chr2_61190024  | 20 | chr20_48467560 | 5.758   | 7.582 | 0.005896 | PUS10   | SLC9A8                 |
| 5  | chr5_96249323  | 6  | chr6_138539306 | 2.363   | 7.58  | 0.0059   | ERAP2   | PBOV1                  |
| 10 | chr10_75136022 | 16 | chr16_30938811 | 12.33   | 7.579 | 0.005905 | ANXA7   | FBXL19                 |
| 1  | chr1_207009910 | 19 | chr19_49399711 | 7.417   | 7.579 | 0.005906 | IL19    | TULP2                  |
| 5  | chr5_96249323  | 19 | chr19_10112594 | 2.393   | 7.578 | 0.005908 | COL5A3  | ERAP2                  |
| 9  | chr9_32630600  | 12 | chr12_56740682 | 9.12    | 7.576 | 0.005914 | STAT2   | TAF1L                  |
| 5  | chr5_96509055  | 21 | chr21_34876817 | 2.979   | 7.576 | 0.005916 | GART    | RIOK2                  |
| 2  | chr2_102984624 | 18 | chr18_12979041 | 1.172   | 7.575 | 0.005917 | IL18R1  | SEH1L                  |
| 1  | chr1_152770589 | 19 | chr19_10100037 | 0.3944  | 7.575 | 0.00592  | COL5A3  | LCE1D                  |
| 1  | chr1_12387829  | 1  | chr1_159002222 | 0.05366 | 7.574 | 0.005922 | IFI16   | VPS13D                 |
| 5  | chr5_158750013 | 17 | chr17_40854559 | 2.419   | 7.573 | 0.005925 | EZH1    | IL12B                  |
| 3  | chr3_45187671  | 3  | chr3_121643974 | 3.988   | 7.572 | 0.005928 | CDCP1   | SLC15A2                |
| 16 | chr16_11361927 | 19 | chr19_10104154 | 0.3629  | 7.571 | 0.005932 | COL5A3  | TNP2                   |
| 11 | chr11_9875164  | 17 | chr17_40481529 | 0.2148  | 7.57  | 0.005936 | SBF2    | STAT3                  |
| 9  | chr9_32629967  | 17 | chr17_73871467 | 3.705   | 7.57  | 0.005936 | TAF1L   | TRIM47                 |

|    |                |    |                 |         |       |          |          |              |
|----|----------------|----|-----------------|---------|-------|----------|----------|--------------|
| 3  | chr3_45187671  | 3  | chr3_121822702  | 5.307   | 7.568 | 0.005941 | CD86     | CDCP1        |
| 1  | chr1_12249031  | 19 | chr19_10478756  | 5.742   | 7.568 | 0.005942 | TNFRSF1B | TYK2         |
| 1  | chr1_158990412 | 17 | chr17_73515227  | 2.48    | 7.567 | 0.005943 | IFI16    | TSEN54       |
| 17 | chr17_38079482 | 17 | chr17_38153554  | 0.3897  | 7.567 | 0.005943 | ORMDL3   | PSMD3        |
| 2  | chr2_103011237 | 3  | chr3_169500454  | 2.754   | 7.567 | 0.005946 | IL18R1   | MYNN         |
| 2  | chr2_61145615  | 19 | chr19_10114033  | 2.518   | 7.565 | 0.00595  | COL5A3   | REL          |
| 17 | chr17_38146282 | 20 | chr20_48599549  | 2.641   | 7.564 | 0.005956 | PSMD3    | SNAI1        |
| 2  | chr2_103040177 | 12 | chr12_6928439   | 10.68   | 7.563 | 0.005959 | CD4      | IL18RAP      |
| 19 | chr19_10114033 | 21 | chr21_34876817  | 3.629   | 7.559 | 0.005972 | COL5A3   | GART         |
| 2  | chr2_102968211 | 17 | chr17_38173143  | 0.8857  | 7.558 | 0.005974 | CSF3     | IL1RL1       |
| 1  | chr1_12387829  | 1  | chr1_158990412  | 0.1217  | 7.558 | 0.005976 | IFI16    | VPS13D       |
| 1  | chr1_158987941 | 12 | chr12_111923168 | 0.3982  | 7.557 | 0.005976 | ATXN2    | IFI16        |
| 12 | chr12_56495023 | 20 | chr20_48467560  | 1.638   | 7.558 | 0.005976 | ERBB3    | SLC9A8       |
| 2  | chr2_103090127 | 8  | chr8_3265671    | 5.118   | 7.558 | 0.005976 | CSMD1    | SLC9A4       |
| 5  | chr5_96121715  | 16 | chr16_31339529  | 0.2814  | 7.557 | 0.005977 | ERAP1    | ITGAM        |
| 1  | chr1_67666705  | 12 | chr12_111907989 | 0.09974 | 7.554 | 0.005987 | ATXN2    | IL23R        |
| 2  | chr2_103011237 | 12 | chr12_6928439   | 10.67   | 7.554 | 0.005987 | CD4      | IL18R1       |
| 5  | chr5_96118852  | 11 | chr11_64004683  | 0.2274  | 7.554 | 0.005987 | ERAP1    | VEGFB        |
| 1  | chr1_152759678 | 12 | chr12_56365078  | 0.2545  | 7.554 | 0.005989 | CDK2     | LCE1E        |
| 1  | chr1_173155630 | 12 | chr12_6861043   | 0.2498  | 7.553 | 0.00599  | MLF2     | TNFSF4       |
| 3  | chr3_121646806 | 17 | chr17_26100284  | 0.1988  | 7.553 | 0.00599  | NOS2     | SLC15A2      |
| 2  | chr2_163149965 | 4  | chr4_103557219  | 1.152   | 7.552 | 0.005994 | IFIH1    | MANBA        |
| 5  | chr5_96237114  | 10 | chr10_75564556  | 3.665   | 7.552 | 0.005994 | ERAP2    | NDST2        |
| 5  | chr5_131755603 | 12 | chr12_6626369   | 9.433   | 7.55  | 0.006    | C5orf56  | NCAPD2       |
| 5  | chr5_96225009  | 5  | chr5_96509055   | 0.1844  | 7.55  | 0.006    | ERAP2    | RIOK2        |
| 12 | chr12_56398287 | 20 | chr20_48467560  | 0.2731  | 7.55  | 0.006002 | SLC9A8   | SUOX         |
| 2  | chr2_62733253  | 9  | chr9_32631110   | 0.252   | 7.55  | 0.006002 | TAF1L    | TMEM17       |
| 1  | chr1_8073450   | 17 | chr17_78178830  | 0.1877  | 7.548 | 0.006006 | CARD14   | ERRFI1       |
| 1  | chr1_172634903 | 2  | chr2_102960007  | 0.2561  | 7.547 | 0.006011 | FASLG    | IL1RL1       |
| 2  | chr2_60695977  | 17 | chr17_38173143  | 3.446   | 7.547 | 0.006012 | BCL11A   | CSF3         |
| 5  | chr5_150496853 | 17 | chr17_37933916  | 9.781   | 7.546 | 0.006013 | ANXA6    | IKZF3        |
| 5  | chr5_96117300  | 16 | chr16_31339529  | 0.3279  | 7.545 | 0.006018 | ERAP1    | ITGAM        |
| 2  | chr2_103006387 | 8  | chr8_3265671    | 5.235   | 7.543 | 0.006024 | CSMD1    | IL18R1       |
| 1  | chr1_206972442 | 5  | chr5_96125910   | 1.899   | 7.543 | 0.006025 | ERAP1    | IL19         |
| 5  | chr5_79374668  | 16 | chr16_11009267  | 0.3646  | 7.543 | 0.006025 | CIITA    | CTD-220I18.1 |
| 1  | chr1_67889571  | 5  | chr5_96121183   | 0.8269  | 7.543 | 0.006026 | ERAP1    | SERBP1       |
| 12 | chr12_6562768  | 17 | chr17_38073341  | 6.211   | 7.543 | 0.006026 | GSDMB    | TAFBPL       |
| 16 | chr16_10998482 | 16 | chr16_31341942  | 0.245   | 7.541 | 0.006033 | CIITA    | ITGAM        |
| 17 | chr17_74288578 | 17 | chr17_78171944  | 2.977   | 7.54  | 0.006034 | CARD14   | QRICH2       |
| 1  | chr1_234529158 | 5  | chr5_150443005  | 0.146   | 7.54  | 0.006035 | TARBP1   | TNIP1        |
| 17 | chr17_38173143 | 19 | chr19_49119894  | 1.367   | 7.54  | 0.006035 | CSF3     | RPL18        |
| 1  | chr1_67666705  | 5  | chr5_150509163  | 0.04556 | 7.539 | 0.006036 | ANXA6    | IL23R        |
| 1  | chr1_234584446 | 19 | chr19_49206764  | 3.876   | 7.535 | 0.00605  | FUT2     | TARBP1       |
| 5  | chr5_131730095 | 17 | chr17_38031714  | 0.2833  | 7.535 | 0.006051 | SLC22A5  | ZBP2         |
| 5  | chr5_96252998  | 6  | chr6_138539306  | 2.511   | 7.533 | 0.006059 | ERAP2    | PBOV1        |
| 3  | chr3_121810428 | 5  | chr5_96232222   | 2.472   | 7.532 | 0.00606  | CD86     | ERAP2        |
| 1  | chr1_152759678 | 17 | chr17_26116762  | 0.4447  | 7.53  | 0.006069 | LCE1E    | NOS2         |
| 1  | chr1_207013378 | 5  | chr5_96222185   | 3.602   | 7.529 | 0.00607  | ERAP2    | IL19         |
| 2  | chr2_102997884 | 19 | chr19_49671451  | 3.195   | 7.529 | 0.006072 | IL18R1   | TRPM4        |
| 5  | chr5_96125910  | 9  | chr9_32631356   | 3.666   | 7.528 | 0.006075 | ERAP1    | TAF1L        |
| 2  | chr2_102955683 | 10 | chr10_81058027  | 1.107   | 7.527 | 0.006077 | IL1RL1   | ZMIZ1        |
| 3  | chr3_101571838 | 19 | chr19_10108850  | 7.175   | 7.527 | 0.006078 | COL5A3   | NFKBIZ       |
| 3  | chr3_45187671  | 20 | chr20_48497595  | 0.1118  | 7.527 | 0.006078 | CDCP1    | SLC9A8       |
| 2  | chr2_102641201 | 5  | chr5_150518292  | 0.2249  | 7.526 | 0.006082 | ANXA6    | IL1R2        |
| 2  | chr2_102967928 | 11 | chr11_64003792  | 7.913   | 7.526 | 0.006082 | IL1RL1   | VEGFB        |
| 2  | chr2_102968362 | 12 | chr12_6604632   | 0.148   | 7.525 | 0.006085 | IL1RL1   | NCAPD2       |
| 2  | chr2_103006448 | 12 | chr12_56482032  | 7.189   | 7.525 | 0.006086 | ERBB3    | IL18R1       |
| 4  | chr4_103594918 | 14 | chr14_35782163  | 0.4852  | 7.525 | 0.006086 | MANBA    | PSMA6        |
| 1  | chr1_152329369 | 17 | chr17_26101474  | 3.519   | 7.524 | 0.00609  | FLG2     | NOS2         |
| 1  | chr1_7912870   | 16 | chr16_31122571  | 0.6609  | 7.523 | 0.00609  | BCKDK    | UTS2         |
| 3  | chr3_121810428 | 5  | chr5_96125910   | 2.655   | 7.521 | 0.006098 | CD86     | ERAP1        |
| 5  | chr5_150566792 | 14 | chr14_35778161  | 5.016   | 7.52  | 0.006103 | CCDC69   | PSMA6        |
| 7  | chr7_37311496  | 19 | chr19_10472933  | 0.2568  | 7.519 | 0.006105 | ELMO1    | TYK2         |
| 3  | chr3_101451473 | 5  | chr5_96139250   | 3.871   | 7.519 | 0.006106 | CEP97    | ERAP1        |

|    |                 |    |                 |         |       |          |          |          |
|----|-----------------|----|-----------------|---------|-------|----------|----------|----------|
| 12 | chr12_6636392   | 12 | chr12_56744445  | 1.436   | 7.518 | 0.006109 | NCAPD2   | STAT2    |
| 5  | chr5_96249323   | 10 | chr10_75564556  | 4.078   | 7.518 | 0.006109 | ERAP2    | NDST2    |
| 17 | chr17_40459737  | 21 | chr21_34876635  | 0.3299  | 7.516 | 0.006116 | GART     | STAT5A   |
| 2  | chr2_163128755  | 17 | chr17_78117807  | 5.328   | 7.516 | 0.006116 | EIF4A3   | IFIH1    |
| 1  | chr1_152283119  | 2  | chr2_103090127  | 4.415   | 7.514 | 0.006122 | FLG      | SLC9A4   |
| 7  | chr7_37251085   | 17 | chr17_78178170  | 0.5266  | 7.514 | 0.006123 | CARD14   | ELM01    |
| 2  | chr2_102968356  | 4  | chr4_103514445  | 0.892   | 7.513 | 0.006126 | IL1RL1   | NFKB1    |
| 2  | chr2_102984671  | 17 | chr17_40459737  | 0.9074  | 7.512 | 0.006129 | IL18R1   | STAT5A   |
| 2  | chr2_102955683  | 17 | chr17_73539671  | 5.182   | 7.511 | 0.006131 | IL1RL1   | LLGL2    |
| 6  | chr6_138195902  | 17 | chr17_38024626  | 0.2704  | 7.511 | 0.006131 | TNFAIP3  | ZBPB2    |
| 2  | chr2_102968211  | 16 | chr16_11051783  | 8.476   | 7.51  | 0.006135 | CLEC16A  | IL1RL1   |
| 16 | chr16_31371659  | 17 | chr17_73888273  | 2.932   | 7.509 | 0.006138 | ITGAX    | TRIM65   |
| 4  | chr4_103557251  | 19 | chr19_10096595  | 0.215   | 7.508 | 0.006143 | COL5A3   | MANBA    |
| 5  | chr5_96139250   | 10 | chr10_102116399 | 2.287   | 7.506 | 0.006148 | ERAP1    | SCD      |
| 12 | chr12_6636392   | 12 | chr12_56480471  | 4.756   | 7.505 | 0.006151 | ERBB3    | NCAPD2   |
| 5  | chr5_96121994   | 12 | chr12_111947788 | 1.89    | 7.505 | 0.006154 | ATXN2    | ERAP1    |
| 1  | chr1_67633930   | 5  | chr5_96118852   | 0.5133  | 7.504 | 0.006155 | ERAP1    | IL23R    |
| 1  | chr1_67889571   | 2  | chr2_102957348  | 0.8714  | 7.503 | 0.006159 | IL1RL1   | SERBP1   |
| 12 | chr12_6562768   | 17 | chr17_26125857  | 0.08735 | 7.502 | 0.006161 | NOS2     | TAPBP1   |
| 11 | chr11_128356074 | 21 | chr21_34876708  | 2.541   | 7.502 | 0.006162 | ETS1     | GART     |
| 11 | chr11_9875164   | 19 | chr19_10472933  | 4.599   | 7.502 | 0.006163 | SBF2     | TYK2     |
| 17 | chr17_26116619  | 17 | chr17_38029120  | 0.3411  | 7.502 | 0.006163 | NOS2     | ZBPB2    |
| 3  | chr3_121646806  | 14 | chr14_64896993  | 2.89    | 7.501 | 0.006166 | MIR548AZ | SLC15A2  |
| 1  | chr1_7998790    | 20 | chr20_48599549  | 0.1948  | 7.5   | 0.006171 | SNAI1    | TNFRSF9  |
| 12 | chr12_56384687  | 16 | chr16_31390845  | 2.944   | 7.5   | 0.006171 | ITGAX    | RAB5B    |
| 2  | chr2_61175288   | 12 | chr12_6604076   | 3.038   | 7.499 | 0.006174 | NCAPD2   | PUS10    |
| 5  | chr5_96121069   | 12 | chr12_112486140 | 0.2301  | 7.496 | 0.006183 | ERAP1    | NAA25    |
| 12 | chr12_6464958   | 21 | chr21_34876708  | 0.3453  | 7.496 | 0.006184 | GART     | SCNN1A   |
| 1  | chr1_26603964   | 5  | chr5_158750013  | 2.36    | 7.494 | 0.006189 | CEP85    | IL12B    |
| 2  | chr2_62728046   | 17 | chr17_40476759  | 0.2357  | 7.494 | 0.006189 | STAT3    | TMEM17   |
| 2  | chr2_103039873  | 4  | chr4_103531882  | 0.187   | 7.493 | 0.006195 | IL18RAP  | NFKB1    |
| 1  | chr1_158987941  | 12 | chr12_6464958   | 0.3807  | 7.492 | 0.006199 | IFI16    | SCNN1A   |
| 1  | chr1_159002222  | 1  | chr1_207009910  | 0.8996  | 7.492 | 0.006199 | IFI16    | IL19     |
| 18 | chr18_12984340  | 19 | chr19_10264986  | 5.859   | 7.489 | 0.006208 | DNMT1    | SEH1L    |
| 1  | chr1_7879424    | 1  | chr1_152770589  | 2.771   | 7.488 | 0.006211 | LCE1D    | PER3     |
| 5  | chr5_158750013  | 12 | chr12_6457918   | 4.447   | 7.487 | 0.006216 | IL12B    | SCNN1A   |
| 2  | chr2_103130373  | 5  | chr5_158705519  | 0.6308  | 7.486 | 0.006217 | SLC9A4   | UBLCP1   |
| 1  | chr1_152770589  | 19 | chr19_10421269  | 17.12   | 7.486 | 0.006218 | FDX1L    | LCE1D    |
| 2  | chr2_103040945  | 2  | chr2_103130373  | 1.211   | 7.486 | 0.006219 | IL18RAP  | SLC9A4   |
| 2  | chr2_102968211  | 12 | chr12_6623942   | 0.1979  | 7.486 | 0.00622  | IL1RL1   | NCAPD2   |
| 13 | chr13_40256402  | 19 | chr19_10464687  | 2.918   | 7.485 | 0.006221 | COG6     | TYK2     |
| 2  | chr2_103011237  | 20 | chr20_48497562  | 2.94    | 7.483 | 0.006228 | IL18R1   | SLC9A8   |
| 3  | chr3_121647656  | 16 | chr16_10996069  | 0.2914  | 7.483 | 0.006228 | CIITA    | SLC15A2  |
| 1  | chr1_12249031   | 12 | chr12_6635503   | 0.4258  | 7.482 | 0.006232 | NCAPD2   | TNFRSF1B |
| 2  | chr2_102968356  | 12 | chr12_6623942   | 0.198   | 7.481 | 0.006236 | IL1RL1   | NCAPD2   |
| 1  | chr1_67845536   | 2  | chr2_103006387  | 0.2451  | 7.48  | 0.006238 | IL12RB2  | IL18R1   |
| 3  | chr3_45187671   | 5  | chr5_96251428   | 1.48    | 7.48  | 0.006238 | CDCP1    | ERAP2    |
| 1  | chr1_8073466    | 17 | chr17_38024626  | 0.2619  | 7.48  | 0.00624  | ERRFI1   | ZBPB2    |
| 2  | chr2_62728105   | 19 | chr19_10248318  | 5.468   | 7.476 | 0.006253 | DNMT1    | TMEM17   |
| 1  | chr1_207009910  | 6  | chr6_138201405  | 11.16   | 7.476 | 0.006254 | IL19     | TNFAIP3  |
| 1  | chr1_206942085  | 5  | chr5_96509055   | 0.2934  | 7.474 | 0.00626  | IL10     | RIOK2    |
| 12 | chr12_6959859   | 16 | chr16_31095251  | 14.64   | 7.474 | 0.006261 | CDCA3    | PRSS53   |
| 2  | chr2_102997884  | 17 | chr17_38031714  | 0.8624  | 7.474 | 0.006261 | IL18R1   | ZBPB2    |
| 1  | chr1_158986477  | 16 | chr16_31332628  | 0.3897  | 7.473 | 0.006262 | IFI16    | ITGAM    |
| 2  | chr2_102998279  | 12 | chr12_6928439   | 10.53   | 7.473 | 0.006263 | CD4      | IL18R1   |
| 1  | chr1_234584446  | 19 | chr19_49230702  | 2.913   | 7.472 | 0.006267 | RASIP1   | TARBP1   |
| 1  | chr1_152552160  | 17 | chr17_38029120  | 2.123   | 7.472 | 0.006268 | LCE3D    | ZBPB2    |
| 9  | chr9_32630600   | 12 | chr12_56744422  | 8.995   | 7.47  | 0.006275 | STAT2    | TAF1L    |
| 1  | chr1_206972365  | 2  | chr2_102984624  | 6.056   | 7.469 | 0.006276 | IL18R1   | IL19     |
| 1  | chr1_206972365  | 2  | chr2_102968007  | 6.16    | 7.469 | 0.006277 | IL19     | IL1RL1   |
| 1  | chr1_152770521  | 12 | chr12_6928026   | 0.4181  | 7.469 | 0.006278 | CD4      | LCE1D    |
| 1  | chr1_152326556  | 2  | chr2_163137683  | 5.961   | 7.466 | 0.006287 | FLG2     | IFIH1    |
| 1  | chr1_152326556  | 2  | chr2_163136771  | 5.961   | 7.465 | 0.006289 | FLG2     | IFIH1    |
| 17 | chr17_78178182  | 19 | chr19_10812818  | 0.2043  | 7.465 | 0.006291 | CARD14   | QTRT1    |



|    |                |    |                 |         |       |          |          |          |
|----|----------------|----|-----------------|---------|-------|----------|----------|----------|
| 2  | chr2_103011024 | 3  | chr3_121647656  | 4.855   | 7.465 | 0.006292 | IL18R1   | SLC15A2  |
| 10 | chr10_81058027 | 11 | chr11_128354797 | 2.56    | 7.462 | 0.006302 | ETS1     | ZMZ1     |
| 10 | chr10_81056383 | 12 | chr12_6626369   | 0.8377  | 7.461 | 0.006306 | NCAPD2   | ZMZ1     |
| 4  | chr4_103635674 | 16 | chr16_11444716  | 10.09   | 7.457 | 0.00632  | MANBA    | RMI2     |
| 2  | chr2_102997884 | 4  | chr4_103531882  | 0.1878  | 7.454 | 0.006329 | IL18R1   | NFKB1    |
| 2  | chr2_62112220  | 19 | chr19_10108850  | 0.2265  | 7.454 | 0.00633  | CCT4     | COL5A3   |
| 2  | chr2_62728046  | 12 | chr12_6562768   | 0.8699  | 7.454 | 0.006331 | TAPBPL   | TMEM17   |
| 4  | chr4_103561106 | 5  | chr5_79773169   | 0.1216  | 7.453 | 0.006332 | MANBA    | ZFYVE16  |
| 1  | chr1_158815484 | 4  | chr4_103537442  | 0.2713  | 7.452 | 0.006338 | MNDA     | NFKB1    |
| 17 | chr17_40481529 | 17 | chr17_78179386  | 0.3454  | 7.451 | 0.006339 | CARD14   | STAT3    |
| 2  | chr2_103040177 | 11 | chr11_64003792  | 7.832   | 7.451 | 0.006339 | IL18RAP  | VEGFB    |
| 8  | chr8_3432634   | 10 | chr10_101934235 | 0.08407 | 7.451 | 0.00634  | CSMD1    | ERLIN1   |
| 17 | chr17_38251430 | 20 | chr20_48566065  | 8.836   | 7.446 | 0.006358 | NR1D1    | RNF114   |
| 1  | chr1_207013378 | 5  | chr5_96222183   | 3.577   | 7.446 | 0.006359 | ERAP2    | IL19     |
| 14 | chr14_35761675 | 19 | chr19_10104272  | 1.118   | 7.443 | 0.006367 | COL5A3   | PSMA6    |
| 17 | chr17_38029120 | 17 | chr17_38073517  | 0.1611  | 7.443 | 0.006367 | GSDMB    | ZPBP2    |
| 14 | chr14_35761675 | 20 | chr20_48562189  | 0.3871  | 7.443 | 0.00637  | PSMA6    | RNF114   |
| 2  | chr2_103011237 | 11 | chr11_64003792  | 7.821   | 7.442 | 0.006373 | IL18R1   | VEGFB    |
| 5  | chr5_158705065 | 14 | chr14_64896783  | 0.6858  | 7.442 | 0.006373 | MIR548AZ | UBLCP1   |
| 10 | chr10_81056383 | 17 | chr17_73997543  | 9.077   | 7.441 | 0.006374 | CDK3     | ZMZ1     |
| 4  | chr4_103594938 | 17 | chr17_76425289  | 4.756   | 7.44  | 0.006379 | DNAH17   | MANBA    |
| 3  | chr3_101451473 | 5  | chr5_96249323   | 4.435   | 7.44  | 0.00638  | CEP97    | ERAP2    |
| 19 | chr19_10099861 | 19 | chr19_10475652  | 1.955   | 7.438 | 0.006385 | COL5A3   | TYK2     |
| 11 | chr11_64543820 | 16 | chr16_11444716  | 0.5043  | 7.437 | 0.00639  | RMI2     | SF1      |
| 1  | chr1_172633592 | 2  | chr2_102998279  | 2.388   | 7.437 | 0.006391 | FASLG    | IL18R1   |
| 10 | chr10_81065046 | 17 | chr17_38173143  | 0.3016  | 7.436 | 0.006393 | CSF3     | ZMZ1     |
| 14 | chr14_35761675 | 16 | chr16_31372443  | 3.261   | 7.434 | 0.0064   | ITGAX    | PSMA6    |
| 14 | chr14_35761675 | 16 | chr16_11003157  | 0.439   | 7.433 | 0.006405 | CIITA    | PSMA6    |
| 2  | chr2_61128164  | 19 | chr19_10472933  | 0.4599  | 7.433 | 0.006405 | REL      | TYK2     |
| 3  | chr3_121647656 | 8  | chr8_3611496    | 4.082   | 7.431 | 0.006409 | CSMD1    | SLC15A2  |
| 1  | chr1_158987941 | 19 | chr19_49409202  | 2.181   | 7.431 | 0.00641  | IFI16    | NUCB1    |
| 16 | chr16_10998482 | 17 | chr17_78178830  | 0.8935  | 7.431 | 0.006411 | CARD14   | CIITA    |
| 1  | chr1_158986520 | 19 | chr19_10104154  | 0.3858  | 7.43  | 0.006413 | COL5A3   | IFI16    |
| 6  | chr6_111913238 | 17 | chr17_38031714  | 0.3435  | 7.426 | 0.006427 | TRAF3IP2 | ZPBP2    |
| 1  | chr1_152760075 | 19 | chr19_10100037  | 0.3783  | 7.426 | 0.00643  | COL5A3   | LCE1E    |
| 2  | chr2_102967928 | 12 | chr12_6623942   | 0.1992  | 7.426 | 0.00643  | IL1RL1   | NCAPD2   |
| 2  | chr2_163280049 | 12 | chr12_56384687  | 2.987   | 7.424 | 0.006434 | KCNH7    | RAB5B    |
| 16 | chr16_11444716 | 19 | chr19_10395776  | 5.115   | 7.424 | 0.006435 | ICAM1    | RMI2     |
| 12 | chr12_6495275  | 19 | chr19_49300625  | 10.65   | 7.424 | 0.006438 | BCAT2    | LTBR     |
| 3  | chr3_169492105 | 18 | chr18_12978733  | 0.1399  | 7.423 | 0.00644  | MYNN     | SEH1L    |
| 12 | chr12_56737245 | 16 | chr16_31122571  | 0.1727  | 7.422 | 0.006445 | BCKDK    | STAT2    |
| 4  | chr4_103553090 | 14 | chr14_35780167  | 3.062   | 7.421 | 0.006446 | MANBA    | PSMA6    |
| 4  | chr4_103553090 | 5  | chr5_131722917  | 0.3191  | 7.421 | 0.006447 | MANBA    | SLC22A5  |
| 2  | chr2_103001485 | 12 | chr12_6495275   | 0.1719  | 7.419 | 0.006453 | IL18R1   | LTBR     |
| 6  | chr6_138192761 | 19 | chr19_10467370  | 6.77    | 7.419 | 0.006454 | TNFAIP3  | TYK2     |
| 1  | chr1_152326556 | 2  | chr2_163137695  | 5.927   | 7.419 | 0.006455 | FLG2     | IFIH1    |
| 2  | chr2_163361222 | 10 | chr10_81058027  | 0.1677  | 7.416 | 0.006464 | KCNH7    | ZMZ1     |
| 3  | chr3_45187671  | 16 | chr16_11016110  | 0.1522  | 7.416 | 0.006464 | CDCP1    | CIITA    |
| 2  | chr2_102998279 | 11 | chr11_128354978 | 5.27    | 7.416 | 0.006466 | ETS1     | IL18R1   |
| 3  | chr3_121658343 | 5  | chr5_96222185   | 4.744   | 7.415 | 0.00647  | ERAP2    | SLC15A2  |
| 17 | chr17_40478193 | 19 | chr19_49573245  | 5.294   | 7.413 | 0.006474 | KCNA7    | STAT3    |
| 2  | chr2_62728046  | 3  | chr3_121810428  | 2.588   | 7.412 | 0.00648  | CD86     | TMEM17   |
| 1  | chr1_158986225 | 6  | chr6_111913219  | 0.3339  | 7.409 | 0.006489 | IFI16    | TRAF3IP2 |
| 1  | chr1_159002778 | 12 | chr12_112479891 | 2.296   | 7.409 | 0.006489 | IFI16    | NAA25    |
| 16 | chr16_11016173 | 17 | chr17_78178182  | 0.147   | 7.404 | 0.006509 | CARD14   | CIITA    |
| 12 | chr12_6174384  | 16 | chr16_31095251  | 0.04337 | 7.403 | 0.006511 | PRSS53   | VWF      |
| 5  | chr5_96121715  | 17 | chr17_38079505  | 3.817   | 7.403 | 0.006512 | ERAP1    | ORMDL3   |
| 12 | chr12_6636392  | 17 | chr17_40485964  | 5.174   | 7.402 | 0.006513 | NCAPD2   | STAT3    |
| 2  | chr2_103040177 | 3  | chr3_169500454  | 2.634   | 7.403 | 0.006513 | IL18RAP  | MYNN     |
| 9  | chr9_32630600  | 12 | chr12_56750204  | 8.883   | 7.402 | 0.006515 | STAT2    | TAF1L    |
| 1  | chr1_159002778 | 5  | chr5_96508966   | 2.974   | 7.402 | 0.006516 | IFI16    | RIOK2    |
| 4  | chr4_103594918 | 5  | chr5_150704781  | 0.4181  | 7.4   | 0.006523 | MANBA    | SLC36A2  |
| 2  | chr2_62450631  | 10 | chr10_101934235 | 1.201   | 7.399 | 0.006527 | B3GNT2   | ERLIN1   |
| 1  | chr1_159021600 | 12 | chr12_6626369   | 3.973   | 7.398 | 0.006529 | IFI16    | NCAPD2   |

|    |                 |    |                |         |       |          |          |          |
|----|-----------------|----|----------------|---------|-------|----------|----------|----------|
| 5  | chr5_150414960  | 17 | chr17_73888354 | 1.402   | 7.397 | 0.006532 | TNIP1    | TRIM65   |
| 12 | chr12_56494078  | 17 | chr17_38153473 | 3.204   | 7.397 | 0.006533 | ERBB3    | PSMD3    |
| 1  | chr1_207013378  | 5  | chr5_96339273  | 3.629   | 7.396 | 0.006536 | IL19     | LNPEP    |
| 1  | chr1_172633592  | 2  | chr2_102968356 | 2.633   | 7.396 | 0.006538 | FASLG    | IL1RL1   |
| 2  | chr2_61108996   | 6  | chr6_351163    | 0.2354  | 7.395 | 0.006541 | DUSP22   | REL      |
| 1  | chr1_152329369  | 17 | chr17_74170001 | 2.632   | 7.394 | 0.006544 | FLG2     | RNF157   |
| 2  | chr2_163369230  | 19 | chr19_53454387 | 6.479   | 7.394 | 0.006545 | KCNH7    | ZNF816   |
| 2  | chr2_103040177  | 3  | chr3_121649809 | 2.904   | 7.393 | 0.00655  | IL18RAP  | SLC15A2  |
| 1  | chr1_234584446  | 2  | chr2_61239020  | 2.266   | 7.392 | 0.006551 | PUS10    | TARBP1   |
| 2  | chr2_163139026  | 4  | chr4_103557251 | 0.1593  | 7.391 | 0.006556 | IFIH1    | MANBA    |
| 2  | chr2_62728105   | 3  | chr3_45187671  | 1.113   | 7.39  | 0.006558 | CDCP1    | TMEM17   |
| 1  | chr1_234563556  | 5  | chr5_150518177 | 0.396   | 7.389 | 0.006561 | ANXA6    | TARBP1   |
| 11 | chr11_65601560  | 20 | chr20_48566065 | 1.515   | 7.388 | 0.006565 | RNF114   | SNX32    |
| 4  | chr4_103594918  | 17 | chr17_76425289 | 4.664   | 7.388 | 0.006566 | DNAH17   | MANBA    |
| 2  | chr2_102998279  | 20 | chr20_48497562 | 2.911   | 7.388 | 0.006567 | IL18R1   | SLC9A8   |
| 13 | chr13_40293499  | 19 | chr19_10475652 | 4.665   | 7.385 | 0.006577 | COG6     | TYK2     |
| 5  | chr5_132036031  | 17 | chr17_78166385 | 8.972   | 7.382 | 0.006587 | CARD14   | KIF3A    |
| 2  | chr2_62728105   | 12 | chr12_10205522 | 5.15    | 7.381 | 0.006591 | CLEC9A   | TMEM17   |
| 1  | chr1_158548836  | 17 | chr17_38024626 | 10.67   | 7.38  | 0.006596 | OR10X1   | ZBP2     |
| 1  | chr1_152732436  | 2  | chr2_163302937 | 3.942   | 7.38  | 0.006597 | KCNH7    | KPRP     |
| 11 | chr11_65372942  | 12 | chr12_6483463  | 7.293   | 7.379 | 0.006598 | MAP3K11  | SCNNA1   |
| 2  | chr2_103011237  | 12 | chr12_6604632  | 0.1534  | 7.376 | 0.006608 | IL18R1   | NCAPD2   |
| 2  | chr2_103040182  | 4  | chr4_103531882 | 0.1894  | 7.377 | 0.006608 | IL18RAP  | NFKB1    |
| 2  | chr2_163137695  | 12 | chr12_6131085  | 3.903   | 7.376 | 0.006611 | IFIH1    | VWF      |
| 5  | chr5_96121183   | 5  | chr5_96222183  | 1.207   | 7.376 | 0.006611 | ERAP1    | ERAP2    |
| 2  | chr2_163369202  | 21 | chr21_34876708 | 0.1157  | 7.375 | 0.006615 | GART     | KCNH7    |
| 1  | chr1_152732436  | 14 | chr14_35779929 | 0.2051  | 7.374 | 0.006619 | KPRP     | PSMA6    |
| 1  | chr1_159023338  | 5  | chr5_96222185  | 2.929   | 7.372 | 0.006623 | ERAP2    | IFI16    |
| 12 | chr12_111895203 | 17 | chr17_77753128 | 10.38   | 7.372 | 0.006625 | ATXN2    | CBX2     |
| 2  | chr2_103057775  | 16 | chr16_31095204 | 7.142   | 7.37  | 0.006631 | IL18RAP  | PRSS53   |
| 2  | chr2_102957348  | 5  | chr5_79770655  | 8.02    | 7.37  | 0.006633 | IL1RL1   | ZFYVE16  |
| 9  | chr9_32630600   | 12 | chr12_56744276 | 8.845   | 7.368 | 0.006639 | STAT2    | TAF1L    |
| 1  | chr1_207010094  | 19 | chr19_10114033 | 0.3398  | 7.368 | 0.00664  | COL5A3   | IL19     |
| 2  | chr2_163136727  | 17 | chr17_40467745 | 3.721   | 7.368 | 0.00664  | IFIH1    | STAT3    |
| 2  | chr2_102957348  | 7  | chr7_37252951  | 0.1792  | 7.367 | 0.006643 | ELMO1    | IL1RL1   |
| 1  | chr1_152326556  | 2  | chr2_163137871 | 5.889   | 7.366 | 0.006647 | FLG2     | IFIH1    |
| 1  | chr1_67666705   | 17 | chr17_78222096 | 8.404   | 7.365 | 0.00665  | IL23R    | SLC26A11 |
| 10 | chr10_81056383  | 19 | chr19_49230664 | 6.407   | 7.365 | 0.006652 | RASIP1   | ZMIZ1    |
| 12 | chr12_6138592   | 17 | chr17_26084532 | 3.703   | 7.362 | 0.00666  | NOS2     | VWF      |
| 1  | chr1_207010411  | 16 | chr16_31095204 | 10.86   | 7.362 | 0.006663 | IL19     | PRSS53   |
| 16 | chr16_31437374  | 18 | chr18_12984340 | 4.489   | 7.361 | 0.006664 | ITGAD    | SEH1L    |
| 2  | chr2_62728046   | 12 | chr12_10205522 | 5.138   | 7.359 | 0.006673 | CLEC9A   | TMEM17   |
| 3  | chr3_101450832  | 19 | chr19_10464687 | 0.3298  | 7.359 | 0.006674 | CEP97    | TYK2     |
| 1  | chr1_67155974   | 19 | chr19_10114033 | 0.2628  | 7.358 | 0.006676 | COL5A3   | SGIP1    |
| 12 | chr12_6483463   | 16 | chr16_31393090 | 0.3454  | 7.357 | 0.006682 | ITGAX    | SCNNA1   |
| 1  | chr1_12249031   | 6  | chr6_138628728 | 1.996   | 7.352 | 0.006697 | ARFGEF3  | TNFRSF1B |
| 5  | chr5_96121069   | 8  | chr8_3432543   | 2.699   | 7.35  | 0.006705 | CSMD1    | ERAP1    |
| 1  | chr1_234565787  | 13 | chr13_99966536 | 0.4821  | 7.35  | 0.006707 | MIR548AN | TARBP1   |
| 1  | chr1_207009910  | 12 | chr12_56748421 | 2.582   | 7.349 | 0.006712 | IL19     | STAT2    |
| 3  | chr3_102154124  | 5  | chr5_96117300  | 0.1223  | 7.348 | 0.006713 | ERAP1    | ZPLD1    |
| 1  | chr1_152283271  | 2  | chr2_102984624 | 7.115   | 7.347 | 0.006717 | FLG      | IL18R1   |
| 2  | chr2_62728046   | 19 | chr19_10085062 | 1.152   | 7.347 | 0.006717 | COL5A3   | TMEM17   |
| 1  | chr1_158987941  | 6  | chr6_111912800 | 2.214   | 7.346 | 0.006722 | IFI16    | TRAF3IP2 |
| 1  | chr1_78601528   | 2  | chr2_61108996  | 0.04269 | 7.346 | 0.006722 | GIPC2    | REL      |
| 1  | chr1_234573171  | 10 | chr10_81058144 | 3.472   | 7.345 | 0.006723 | TARBP1   | ZMIZ1    |
| 4  | chr4_103594918  | 19 | chr19_49227758 | 3.446   | 7.345 | 0.006723 | MANBA    | RASIP1   |
| 1  | chr1_159002778  | 17 | chr17_73515227 | 2.575   | 7.343 | 0.006731 | IFI16    | TSEN54   |
| 2  | chr2_163291617  | 16 | chr16_31372344 | 20.57   | 7.343 | 0.006733 | ITGAX    | KCNH7    |
| 20 | chr20_48461713  | 20 | chr20_48566065 | 18.39   | 7.343 | 0.006734 | RNF114   | SLC9A8   |
| 17 | chr17_78166385  | 17 | chr17_78222237 | 10.94   | 7.342 | 0.006736 | CARD14   | SLC26A11 |
| 2  | chr2_102955611  | 5  | chr5_96222183  | 3.527   | 7.342 | 0.006736 | ERAP2    | IL1RL1   |
| 12 | chr12_6483463   | 17 | chr17_73723363 | 0.3124  | 7.341 | 0.006739 | ITGB4    | SCNNA1   |
| 2  | chr2_103006387  | 10 | chr10_81058027 | 1.102   | 7.341 | 0.006741 | IL18R1   | ZMIZ1    |
| 2  | chr2_103120245  | 19 | chr19_10464687 | 4.538   | 7.34  | 0.006745 | SLC9A4   | TYK2     |

|    |                 |    |                 |         |       |          |               |          |
|----|-----------------|----|-----------------|---------|-------|----------|---------------|----------|
| 1  | chr1_152326837  | 12 | chr12_6483463   | 0.09204 | 7.338 | 0.00675  | FLG2          | SCNN1A   |
| 12 | chr12_6619284   | 12 | chr12_56364898  | 0.3413  | 7.337 | 0.006756 | CDK2          | NCAPD2   |
| 2  | chr2_103001485  | 12 | chr12_6500105   | 0.1758  | 7.337 | 0.006756 | IL18R1        | LTBR     |
| 2  | chr2_61175204   | 17 | chr17_38173143  | 3.398   | 7.335 | 0.006763 | CSF3          | PUS10    |
| 2  | chr2_163291617  | 5  | chr5_96249323   | 1.177   | 7.334 | 0.006764 | ERAP2         | KCNH7    |
| 5  | chr5_131729546  | 12 | chr12_6619284   | 3.437   | 7.335 | 0.006764 | NCAPD2        | SLC22A5  |
| 2  | chr2_102968211  | 17 | chr17_38024626  | 0.8774  | 7.334 | 0.006766 | IL1RL1        | ZBPB2    |
| 3  | chr3_101451473  | 5  | chr5_96232222   | 4.388   | 7.333 | 0.006768 | CEP97         | ERAP2    |
| 2  | chr2_103090127  | 17 | chr17_73539671  | 4.662   | 7.333 | 0.006771 | LLGL2         | SLC9A4   |
| 1  | chr1_234573171  | 20 | chr20_48599549  | 0.9092  | 7.332 | 0.006773 | SNAI1         | TARBP1   |
| 1  | chr1_152770589  | 2  | chr2_62228016   | 0.169   | 7.331 | 0.006776 | COMMD1        | LCE1D    |
| 5  | chr5_96249323   | 16 | chr16_31272988  | 2.462   | 7.331 | 0.006777 | ERAP2         | ITGAM    |
| 5  | chr5_96139250   | 5  | chr5_150282783  | 0.1908  | 7.331 | 0.006779 | ERAP1         | ZNF300   |
| 5  | chr5_158750013  | 11 | chr11_64004561  | 0.7401  | 7.329 | 0.006785 | IL12B         | VEGFB    |
| 1  | chr1_152328568  | 3  | chr3_45187671   | 0.161   | 7.328 | 0.006787 | CDCP1         | FLG2     |
| 5  | chr5_96121069   | 17 | chr17_78269304  | 3.895   | 7.327 | 0.006792 | ERAP1         | RNF213   |
| 9  | chr9_32632431   | 17 | chr17_78166385  | 7.738   | 7.327 | 0.006792 | CARD14        | TAF1L    |
| 6  | chr6_111913238  | 17 | chr17_38029120  | 0.346   | 7.327 | 0.006793 | TRAF3IP2      | ZBPB2    |
| 2  | chr2_103040182  | 5  | chr5_79770655   | 8.101   | 7.326 | 0.006795 | IL18RAP       | ZFYVE16  |
| 2  | chr2_163136727  | 12 | chr12_112479891 | 0.267   | 7.326 | 0.006795 | IFIH1         | NAA25    |
| 1  | chr1_234565787  | 5  | chr5_158750013  | 0.9067  | 7.326 | 0.006797 | IL12B         | TARBP1   |
| 10 | chr10_89487116  | 18 | chr18_12978733  | 0.1734  | 7.326 | 0.006797 | PAPSS2        | SEH1L    |
| 2  | chr2_102997884  | 5  | chr5_79770655   | 7.971   | 7.326 | 0.006798 | IL18R1        | ZFYVE16  |
| 2  | chr2_103130373  | 5  | chr5_79768604   | 0.2449  | 7.326 | 0.006798 | SLC9A4        | ZFYVE16  |
| 11 | chr11_65423361  | 17 | chr17_40481529  | 2.781   | 7.324 | 0.006803 | RELA          | STAT3    |
| 1  | chr1_172634869  | 12 | chr12_6626369   | 0.1554  | 7.322 | 0.00681  | FASLG         | NCAPD2   |
| 17 | chr17_40359382  | 21 | chr21_34954851  | 6.616   | 7.322 | 0.006812 | DONSON        | STAT5B   |
| 1  | chr1_152323238  | 17 | chr17_40481529  | 2.772   | 7.322 | 0.006813 | FLG2          | STAT3    |
| 5  | chr5_150566792  | 19 | chr19_10226273  | 2.625   | 7.321 | 0.006815 | CCDC69        | EIF3G    |
| 1  | chr1_152770589  | 8  | chr8_3226856    | 2.789   | 7.321 | 0.006817 | CSMD1         | LCE1D    |
| 10 | chr10_75157049  | 17 | chr17_38153473  | 0.1282  | 7.32  | 0.006821 | ANXA7         | PSMD3    |
| 1  | chr1_152732436  | 12 | chr12_112479891 | 2.017   | 7.319 | 0.006823 | KPRP          | NAA25    |
| 5  | chr5_96124296   | 12 | chr12_56530716  | 6.187   | 7.319 | 0.006823 | ERAP1         | ESYT1    |
| 2  | chr2_103040177  | 19 | chr19_10104154  | 1.168   | 7.318 | 0.006827 | COL5A3        | IL18RAP  |
| 2  | chr2_102968007  | 3  | chr3_121634344  | 0.2036  | 7.318 | 0.006828 | IL1RL1        | SLC15A2  |
| 11 | chr11_9879936   | 14 | chr14_35596323  | 4.672   | 7.317 | 0.006832 | KIAA0391      | SBF2     |
| 1  | chr1_234565787  | 5  | chr5_150518177  | 0.4118  | 7.315 | 0.006838 | ANXA6         | TARBP1   |
| 11 | chr11_9874234   | 17 | chr17_38063381  | 4.435   | 7.314 | 0.006841 | GSDMB         | SBF2     |
| 2  | chr2_103040177  | 12 | chr12_6637054   | 0.1555  | 7.313 | 0.006844 | IL18RAP       | NCAPD2   |
| 2  | chr2_163137871  | 12 | chr12_6131085   | 3.88    | 7.313 | 0.006845 | IFIH1         | VWF      |
| 3  | chr3_121646806  | 5  | chr5_96124447   | 1.191   | 7.313 | 0.006845 | ERAP1         | SLC15A2  |
| 1  | chr1_78024514   | 5  | chr5_96125910   | 4.394   | 7.313 | 0.006848 | AK5           | ERAP1    |
| 1  | chr1_67889905   | 5  | chr5_96509055   | 0.3609  | 7.312 | 0.00685  | RIOK2         | SERBP1   |
| 2  | chr2_102968356  | 3  | chr3_121634344  | 0.2038  | 7.309 | 0.006862 | IL1RL1        | SLC15A2  |
| 5  | chr5_79374582   | 5  | chr5_96124447   | 10.37   | 7.309 | 0.006862 | CTD-2201118.1 | ERAP1    |
| 18 | chr18_61649161  | 19 | chr19_10104272  | 4.681   | 7.304 | 0.00688  | COL5A3        | SERPINB8 |
| 4  | chr4_103514445  | 12 | chr12_56825260  | 0.3049  | 7.303 | 0.006884 | NFKB1         | TIMELESS |
| 5  | chr5_158705065  | 14 | chr14_64897018  | 0.6932  | 7.302 | 0.006887 | MIR548AZ      | UBLCP1   |
| 1  | chr1_152770521  | 12 | chr12_6619022   | 0.1601  | 7.301 | 0.006891 | LCE1D         | NCAPD2   |
| 1  | chr1_158987941  | 2  | chr2_103001485  | 2.349   | 7.3   | 0.006894 | IFI16         | IL18R1   |
| 1  | chr1_152732436  | 1  | chr1_173155687  | 0.3904  | 7.299 | 0.0069   | KPRP          | TNFSF4   |
| 16 | chr16_11363064  | 20 | chr20_48524827  | 4.582   | 7.299 | 0.0069   | SPATA2        | TNP2     |
| 1  | chr1_8073450    | 17 | chr17_78178182  | 5.409   | 7.298 | 0.006904 | CARD14        | ERRFI1   |
| 2  | chr2_102955683  | 12 | chr12_10205522  | 0.1596  | 7.298 | 0.006905 | CLEC9A        | IL1RL1   |
| 10 | chr10_81056383  | 11 | chr11_128354797 | 4.558   | 7.296 | 0.00691  | ETS1          | ZMIZ1    |
| 1  | chr1_173155630  | 16 | chr16_10998482  | 7.067   | 7.296 | 0.006911 | CIITA         | TNFSF4   |
| 6  | chr6_111912800  | 19 | chr19_10464687  | 2.433   | 7.294 | 0.006918 | TRAF3IP2      | TYK2     |
| 14 | chr14_35872926  | 17 | chr17_40498461  | 0.1751  | 7.293 | 0.006921 | NFKBIA        | STAT3    |
| 2  | chr2_102641201  | 19 | chr19_10085062  | 0.8539  | 7.293 | 0.006921 | COL5A3        | IL1R2    |
| 10 | chr10_101934036 | 19 | chr19_10472933  | 2.448   | 7.293 | 0.006923 | ERLIN1        | TYK2     |
| 17 | chr17_40481529  | 19 | chr19_10449501  | 4.097   | 7.292 | 0.006925 | ICAM3         | STAT3    |
| 9  | chr9_32634519   | 12 | chr12_6636392   | 0.05932 | 7.292 | 0.006928 | NCAPD2        | TAF1L    |
| 1  | chr1_152732436  | 19 | chr19_10100037  | 0.3884  | 7.291 | 0.006929 | COL5A3        | KPRP     |
| 5  | chr5_158750013  | 12 | chr12_6959790   | 3.349   | 7.29  | 0.006934 | CDCA3         | IL12B    |

|    |                 |    |                 |         |       |          |          |              |
|----|-----------------|----|-----------------|---------|-------|----------|----------|--------------|
| 1  | chr1_234565980  | 16 | chr16_10998482  | 0.2899  | 7.29  | 0.006935 | CIITA    | TARBP1       |
| 16 | chr16_10996069  | 17 | chr17_38153554  | 3.446   | 7.289 | 0.006936 | CIITA    | PSMD3        |
| 17 | chr17_38033076  | 17 | chr17_78166385  | 3.045   | 7.289 | 0.006936 | CARD14   | ZBPB2        |
| 1  | chr1_12387829   | 1  | chr1_158986477  | 0.05725 | 7.289 | 0.006937 | IFI16    | VPS13D       |
| 1  | chr1_152770521  | 4  | chr4_103537729  | 0.1219  | 7.289 | 0.006937 | LCE1D    | NFKB1        |
| 1  | chr1_234584446  | 14 | chr14_35780154  | 0.1074  | 7.289 | 0.006937 | PSMA6    | TARBP1       |
| 10 | chr10_81060474  | 19 | chr19_49230415  | 4.261   | 7.288 | 0.006941 | RASIP1   | ZMIZ1        |
| 5  | chr5_96222185   | 19 | chr19_10226273  | 2.68    | 7.288 | 0.006944 | EIF3G    | ERAP2        |
| 3  | chr3_17226642   | 14 | chr14_35761592  | 0.1072  | 7.287 | 0.006945 | PSMA6    | TBC1D5       |
| 1  | chr1_207009910  | 19 | chr19_10421155  | 4.031   | 7.286 | 0.00695  | FDX1L    | IL19         |
| 1  | chr1_152286908  | 19 | chr19_10104272  | 0.4637  | 7.286 | 0.006951 | COL5A3   | FLG          |
| 2  | chr2_163291617  | 17 | chr17_26116743  | 0.1166  | 7.284 | 0.006957 | KCNH7    | NOS2         |
| 2  | chr2_62728046   | 10 | chr10_101927016 | 10.47   | 7.284 | 0.006958 | ERLIN1   | TMEM17       |
| 2  | chr2_163137871  | 17 | chr17_26084296  | 3.047   | 7.283 | 0.00696  | IFIH1    | NOS2         |
| 3  | chr3_101574734  | 19 | chr19_10475652  | 3.56    | 7.282 | 0.006964 | NFKBIZ   | TYK2         |
| 1  | chr1_8422806    | 17 | chr17_38153473  | 3.222   | 7.282 | 0.006966 | PSMD3    | RERE         |
| 1  | chr1_159002778  | 3  | chr3_121613321  | 5.614   | 7.28  | 0.006972 | IFI16    | SLC15A2      |
| 10 | chr10_75564556  | 19 | chr19_10464687  | 3.541   | 7.28  | 0.006973 | NDST2    | TYK2         |
| 1  | chr1_158987941  | 17 | chr17_26115966  | 0.3556  | 7.28  | 0.006975 | IFI16    | NOS2         |
| 12 | chr12_111895149 | 17 | chr17_40481529  | 5.103   | 7.28  | 0.006975 | ATXN2    | STAT3        |
| 2  | chr2_62728105   | 17 | chr17_40476759  | 0.2362  | 7.28  | 0.006975 | STAT3    | TMEM17       |
| 2  | chr2_103039873  | 19 | chr19_10114795  | 3.63    | 7.279 | 0.006976 | COL5A3   | IL18RAP      |
| 4  | chr4_103557219  | 5  | chr5_96118852   | 1.086   | 7.279 | 0.006976 | ERAP1    | MANBA        |
| 1  | chr1_152326477  | 4  | chr4_103537442  | 0.28    | 7.278 | 0.006979 | FLG2     | NFKB1        |
| 1  | chr1_158986225  | 10 | chr10_90034899  | 1.108   | 7.278 | 0.00698  | IFI16    | RNLS         |
| 1  | chr1_7999976    | 16 | chr16_11444716  | 0.2148  | 7.278 | 0.00698  | RMI2     | TNFRSF9      |
| 2  | chr2_103130373  | 18 | chr18_12951951  | 5.208   | 7.278 | 0.00698  | SEH1L    | SLC9A4       |
| 2  | chr2_102998279  | 10 | chr10_89472846  | 9.185   | 7.276 | 0.006987 | IL18R1   | PAPSS2       |
| 5  | chr5_79773169   | 10 | chr10_90034899  | 0.2131  | 7.276 | 0.006987 | RNLS     | ZFYVE16      |
| 3  | chr3_121647656  | 19 | chr19_10467367  | 0.3719  | 7.276 | 0.006989 | SLC15A2  | TYK2         |
| 5  | chr5_96222183   | 10 | chr10_89501064  | 0.1987  | 7.276 | 0.006989 | ERAP2    | PAPSS2       |
| 14 | chr14_35761592  | 20 | chr20_48524827  | 1.224   | 7.276 | 0.00699  | PSMA6    | SPATA2       |
| 3  | chr3_169485892  | 14 | chr14_35761675  | 3.423   | 7.276 | 0.00699  | ACTRT3   | PSMA6        |
| 4  | chr4_103557251  | 5  | chr5_96339273   | 1.095   | 7.275 | 0.006992 | LNPEP    | MANBA        |
| 2  | chr2_103039873  | 5  | chr5_79770655   | 7.912   | 7.275 | 0.006994 | IL18RAP  | ZFYVE16      |
| 12 | chr12_6635495   | 19 | chr19_10114033  | 0.3348  | 7.274 | 0.006995 | COL5A3   | NCAPD2       |
| 4  | chr4_103594918  | 5  | chr5_150496629  | 0.323   | 7.273 | 0.007001 | ANXA6    | MANBA        |
| 1  | chr1_67889571   | 12 | chr12_56825260  | 3.772   | 7.272 | 0.007002 | SERBP1   | TIMELESS     |
| 2  | chr2_61391608   | 12 | chr12_6636392   | 0.2151  | 7.272 | 0.007003 | C2orf74  | NCAPD2       |
| 1  | chr1_152733376  | 17 | chr17_38062588  | 23.81   | 7.272 | 0.007004 | GSDMB    | KPRP         |
| 1  | chr1_152760075  | 12 | chr12_56524333  | 0.1729  | 7.272 | 0.007004 | ESYT1    | LCE1E        |
| 2  | chr2_61181162   | 12 | chr12_6626369   | 0.2125  | 7.271 | 0.007008 | NCAPD2   | PUS10        |
| 1  | chr1_152732436  | 1  | chr1_234563556  | 1.102   | 7.27  | 0.007011 | KPRP     | TARBP1       |
| 2  | chr2_102968362  | 12 | chr12_6623942   | 0.2024  | 7.269 | 0.007014 | IL1RL1   | NCAPD2       |
| 1  | chr1_158990412  | 2  | chr2_103125466  | 0.9166  | 7.269 | 0.007015 | IFI16    | SLC9A4       |
| 4  | chr4_103527878  | 17 | chr17_38024626  | 2.239   | 7.269 | 0.007015 | NFKB1    | ZBPB2        |
| 2  | chr2_103040177  | 17 | chr17_40717855  | 0.2653  | 7.267 | 0.007023 | COASY    | IL18RAP      |
| 5  | chr5_96125910   | 11 | chr11_9457738   | 4.011   | 7.267 | 0.007024 | ERAP1    | IPO7         |
| 1  | chr1_207014445  | 2  | chr2_102960007  | 4.843   | 7.266 | 0.007028 | IL19     | IL1RL1       |
| 2  | chr2_163136771  | 19 | chr19_10753795  | 6.878   | 7.264 | 0.007034 | IFIH1    | SLC44A2      |
| 2  | chr2_61108996   | 14 | chr14_35761704  | 2.86    | 7.264 | 0.007034 | PSMA6    | REL          |
| 2  | chr2_102641201  | 9  | chr9_32633798   | 0.2731  | 7.261 | 0.007046 | IL1R2    | TAF1L        |
| 1  | chr1_152732436  | 2  | chr2_163137804  | 5.5     | 7.259 | 0.007055 | IFIH1    | KPRP         |
| 2  | chr2_102967928  | 11 | chr11_128360376 | 7.219   | 7.258 | 0.007059 | ETS1     | IL1RL1       |
| 1  | chr1_152770589  | 16 | chr16_31485786  | 0.2931  | 7.256 | 0.007068 | LCE1D    | TGFB1I1      |
| 3  | chr3_169485997  | 19 | chr19_10108850  | 0.1548  | 7.255 | 0.00707  | ACTRT3   | COL5A3       |
| 1  | chr1_152595565  | 5  | chr5_96121994   | 0.553   | 7.253 | 0.007078 | ERAP1    | LCE3A        |
| 16 | chr16_11051783  | 20 | chr20_48524827  | 3.966   | 7.253 | 0.007079 | CLEC16A  | SPATA2       |
| 5  | chr5_131825142  | 17 | chr17_78178182  | 2.316   | 7.249 | 0.007093 | CARD14   | IRF1         |
| 1  | chr1_67889571   | 5  | chr5_150498991  | 4.542   | 7.249 | 0.007094 | ANXA6    | SERBP1       |
| 3  | chr3_121646806  | 6  | chr6_111896798  | 2.185   | 7.247 | 0.007102 | SLC15A2  | TRAF3IP2-AS1 |
| 11 | chr11_9802078   | 19 | chr19_10475652  | 0.2716  | 7.247 | 0.007103 | SBF2-AS1 | TYK2         |
| 1  | chr1_207010368  | 10 | chr10_81060474  | 0.2951  | 7.247 | 0.007104 | IL19     | ZMIZ1        |
| 1  | chr1_152329369  | 16 | chr16_11137825  | 0.1747  | 7.246 | 0.007105 | CLEC16A  | FLG2         |

|    |                 |    |                 |         |       |          |          |              |
|----|-----------------|----|-----------------|---------|-------|----------|----------|--------------|
| 2  | chr2_61108996   | 19 | chr19_10668684  | 3.158   | 7.246 | 0.007106 | KRI1     | REL          |
| 2  | chr2_163136727  | 4  | chr4_103553090  | 0.8803  | 7.245 | 0.00711  | IFIH1    | MANBA        |
| 1  | chr1_152286194  | 17 | chr17_38063381  | 0.2883  | 7.245 | 0.007111 | FLG      | GSDMB        |
| 12 | chr12_6861043   | 12 | chr12_56742306  | 2.745   | 7.244 | 0.007113 | MLF2     | STAT2        |
| 1  | chr1_152770521  | 17 | chr17_26094816  | 0.1562  | 7.242 | 0.007123 | LCE1D    | NOS2         |
| 1  | chr1_206239427  | 2  | chr2_62728046   | 0.138   | 7.242 | 0.007123 | C1orf186 | TMEM17       |
| 11 | chr11_9874301   | 19 | chr19_10114033  | 0.4561  | 7.241 | 0.007125 | COL5A3   | LOC101928008 |
| 3  | chr3_121646806  | 5  | chr5_96129512   | 1.194   | 7.241 | 0.007126 | ERAP1    | SLC15A2      |
| 2  | chr2_61180244   | 18 | chr18_12984340  | 0.4469  | 7.241 | 0.007127 | PUS10    | SEH1L        |
| 2  | chr2_102855728  | 12 | chr12_6619284   | 0.3074  | 7.239 | 0.007133 | IL1RL2   | NCAPD2       |
| 11 | chr11_9867142   | 19 | chr19_10114033  | 0.1752  | 7.238 | 0.007136 | COL5A3   | SBF2         |
| 1  | chr1_67155976   | 2  | chr2_103006387  | 0.2584  | 7.238 | 0.007139 | IL18R1   | SGIP1        |
| 5  | chr5_96124447   | 17 | chr17_26105797  | 3.469   | 7.237 | 0.007141 | ERAP1    | NOS2         |
| 5  | chr5_150411677  | 17 | chr17_40474382  | 0.04611 | 7.236 | 0.007147 | STAT3    | TNIP1        |
| 2  | chr2_102960007  | 16 | chr16_10989630  | 0.2245  | 7.235 | 0.007151 | CIITA    | IL1RL1       |
| 2  | chr2_103095494  | 6  | chr6_111887624  | 0.3473  | 7.234 | 0.007152 | SLC9A4   | TRAF3IP2-AS1 |
| 3  | chr3_44826223   | 17 | chr17_40716235  | 0.1815  | 7.234 | 0.007153 | COASY    | KIF15        |
| 5  | chr5_96118852   | 17 | chr17_26089891  | 3.685   | 7.234 | 0.007155 | ERAP1    | NOS2         |
| 9  | chr9_32630600   | 12 | chr12_56733531  | 8.71    | 7.232 | 0.007161 | IL23A    | TAF1L        |
| 2  | chr2_103006387  | 2  | chr2_103095494  | 1.21    | 7.232 | 0.007163 | IL18R1   | SLC9A4       |
| 2  | chr2_102968007  | 11 | chr11_64003792  | 7.611   | 7.231 | 0.007164 | IL1RL1   | VEGFB        |
| 2  | chr2_103006387  | 12 | chr12_56480404  | 0.1061  | 7.231 | 0.007167 | ERBB3    | IL18R1       |
| 4  | chr4_103557251  | 5  | chr5_131755717  | 2.553   | 7.229 | 0.007174 | C5orf56  | MANBA        |
| 1  | chr1_67889571   | 17 | chr17_26100284  | 0.4289  | 7.229 | 0.007175 | NOS2     | SERBP1       |
| 2  | chr2_61390097   | 5  | chr5_96509055   | 4.047   | 7.229 | 0.007175 | C2orf74  | RIOK2        |
| 5  | chr5_131811613  | 12 | chr12_6604076   | 2.331   | 7.229 | 0.007175 | C5orf56  | NCAPD2       |
| 1  | chr1_152681722  | 1  | chr1_158986477  | 0.3847  | 7.228 | 0.007179 | IFI16    | LCE4A        |
| 1  | chr1_67706041   | 14 | chr14_35761592  | 0.2154  | 7.227 | 0.007182 | IL23R    | PSMA6        |
| 12 | chr12_6636392   | 20 | chr20_48466074  | 0.04507 | 7.224 | 0.007193 | NCAPD2   | SLC9A8       |
| 2  | chr2_103040177  | 21 | chr21_35175117  | 0.225   | 7.223 | 0.007197 | IL18RAP  | ITSN1        |
| 2  | chr2_102984624  | 11 | chr11_9838456   | 0.1436  | 7.222 | 0.007202 | IL18R1   | SBF2         |
| 17 | chr17_38062191  | 17 | chr17_40716235  | 1.893   | 7.222 | 0.007203 | COASY    | GSDMB        |
| 5  | chr5_150566792  | 19 | chr19_49119967  | 0.261   | 7.221 | 0.007204 | CCDC69   | RPL18        |
| 4  | chr4_103534560  | 17 | chr17_76425289  | 3.912   | 7.219 | 0.007214 | DNAH17   | NFKB1        |
| 12 | chr12_111894976 | 19 | chr19_10108850  | 0.2952  | 7.218 | 0.007217 | ATXN2    | COL5A3       |
| 5  | chr5_96132795   | 16 | chr16_11137995  | 2.673   | 7.218 | 0.007217 | CLEC16A  | ERAP1        |
| 9  | chr9_32634479   | 16 | chr16_11444716  | 0.3457  | 7.217 | 0.007223 | RMI2     | TAF1L        |
| 1  | chr1_159002778  | 19 | chr19_10103709  | 3.61    | 7.216 | 0.007224 | COL5A3   | IFI16        |
| 12 | chr12_6495275   | 22 | chr22_22162059  | 5.059   | 7.216 | 0.007224 | LTBR     | MAPK1        |
| 17 | chr17_38079482  | 17 | chr17_38173143  | 0.3846  | 7.216 | 0.007226 | CSF3     | ORMDL3       |
| 2  | chr2_163291617  | 6  | chr6_138197299  | 0.3055  | 7.215 | 0.007231 | KCNH7    | TNFAIP3      |
| 2  | chr2_103006387  | 4  | chr4_103561106  | 1.163   | 7.207 | 0.00726  | IL18R1   | MANBA        |
| 2  | chr2_103149248  | 17 | chr17_78171944  | 4.842   | 7.208 | 0.00726  | CARD14   | SLC9A4       |
| 3  | chr3_121643931  | 5  | chr5_96222185   | 2.208   | 7.207 | 0.007263 | ERAP2    | SLC15A2      |
| 1  | chr1_152759678  | 20 | chr20_48431781  | 0.149   | 7.206 | 0.007265 | LCE1E    | SLC9A8       |
| 1  | chr1_152759678  | 19 | chr19_10104272  | 1.117   | 7.205 | 0.007269 | COL5A3   | LCE1E        |
| 3  | chr3_121643974  | 17 | chr17_78178830  | 3.547   | 7.205 | 0.007271 | CARD14   | SLC15A2      |
| 5  | chr5_96121183   | 17 | chr17_74170001  | 0.1984  | 7.205 | 0.007271 | ERAP1    | RNF157       |
| 2  | chr2_102960007  | 3  | chr3_121507383  | 9.76    | 7.205 | 0.007272 | IL1RL1   | IQCB1        |
| 17 | chr17_73515172  | 18 | chr18_12978733  | 3.064   | 7.204 | 0.007274 | SEH1L    | TSEN54       |
| 3  | chr3_121634540  | 16 | chr16_11444716  | 0.184   | 7.202 | 0.007281 | RMI2     | SLC15A2      |
| 3  | chr3_44819654   | 16 | chr16_11444716  | 6.522   | 7.202 | 0.007283 | KIF15    | RMI2         |
| 1  | chr1_159002222  | 5  | chr5_96508966   | 3.112   | 7.201 | 0.007288 | IFI16    | RIOK2        |
| 12 | chr12_6483851   | 12 | chr12_56527264  | 24.94   | 7.2   | 0.007291 | ESYT1    | SCNN1A       |
| 2  | chr2_102998279  | 12 | chr12_56482032  | 6.906   | 7.2   | 0.007291 | ERBB3    | IL18R1       |
| 10 | chr10_75857010  | 17 | chr17_78178170  | 2.242   | 7.2   | 0.007292 | CARD14   | VCL          |
| 1  | chr1_152770521  | 18 | chr18_61465672  | 3.544   | 7.199 | 0.007293 | LCE1D    | SERPINB7     |
| 2  | chr2_103040177  | 18 | chr18_12979041  | 1.168   | 7.199 | 0.007294 | IL18RAP  | SEH1L        |
| 17 | chr17_40717000  | 17 | chr17_73871467  | 7.846   | 7.199 | 0.007295 | COASY    | TRIM47       |
| 2  | chr2_102968007  | 11 | chr11_128360376 | 7.161   | 7.199 | 0.007295 | ETS1     | IL1RL1       |
| 2  | chr2_103090127  | 3  | chr3_121507383  | 9.52    | 7.198 | 0.007299 | IQCB1    | SLC9A4       |
| 1  | chr1_152659194  | 5  | chr5_150496924  | 0.5102  | 7.196 | 0.007305 | ANXA6    | LCE2B        |
| 2  | chr2_102984624  | 3  | chr3_169500454  | 2.743   | 7.196 | 0.007305 | IL18R1   | MYNN         |
| 2  | chr2_102968211  | 14 | chr14_35777191  | 7.341   | 7.193 | 0.007319 | IL1RL1   | PSMA6        |

|    |                 |    |                 |         |       |          |              |              |
|----|-----------------|----|-----------------|---------|-------|----------|--------------|--------------|
| 1  | chr1_152770521  | 19 | chr19_10421269  | 7.587   | 7.192 | 0.007321 | FDX1L        | LCE1D        |
| 4  | chr4_103594938  | 12 | chr12_6619794   | 2.541   | 7.192 | 0.007324 | MANBA        | NCAPD2       |
| 2  | chr2_102968362  | 20 | chr20_48599604  | 4.077   | 7.191 | 0.007328 | IL1RL1       | SNAI1        |
| 1  | chr1_8073466    | 17 | chr17_38031714  | 0.2684  | 7.19  | 0.007329 | ERRFI1       | ZBPB2        |
| 11 | chr11_9878207   | 19 | chr19_49206631  | 2.147   | 7.19  | 0.007333 | FUT2         | SBF2         |
| 12 | chr12_6861043   | 12 | chr12_112479891 | 0.4747  | 7.189 | 0.007334 | MLF2         | NAA25        |
| 2  | chr2_103006387  | 17 | chr17_40481596  | 0.5074  | 7.188 | 0.007338 | IL18R1       | STAT3        |
| 12 | chr12_6174384   | 16 | chr16_31122571  | 0.04533 | 7.187 | 0.007342 | BCKDK        | VWF          |
| 6  | chr6_138628672  | 19 | chr19_53454387  | 8.858   | 7.187 | 0.007344 | ARFGEF3      | ZNF816       |
| 16 | chr16_31485353  | 17 | chr17_26116896  | 0.3119  | 7.187 | 0.007345 | NOS2         | TGFB1I1      |
| 5  | chr5_131811613  | 12 | chr12_6626369   | 2.355   | 7.186 | 0.007347 | C5orf56      | NCAPD2       |
| 18 | chr18_12978733  | 19 | chr19_53453735  | 4.039   | 7.185 | 0.007351 | SEHLL        | ZNF816       |
| 2  | chr2_103006448  | 12 | chr12_6604632   | 0.1594  | 7.185 | 0.007352 | IL18R1       | NCAPD2       |
| 5  | chr5_131671659  | 17 | chr17_40459737  | 0.331   | 7.185 | 0.007352 | SLC22A4      | STAT5A       |
| 12 | chr12_6562768   | 12 | chr12_56744276  | 1.415   | 7.184 | 0.007357 | STAT2        | TAPBPL       |
| 4  | chr4_104007581  | 12 | chr12_6483463   | 4.471   | 7.184 | 0.007357 | BDH2         | SCNN1A       |
| 1  | chr1_159002222  | 2  | chr2_61190047   | 0.4041  | 7.183 | 0.00736  | IFI16        | PUS10        |
| 2  | chr2_103040182  | 12 | chr12_6623942   | 0.1752  | 7.183 | 0.007361 | IL18RAP      | NCAPD2       |
| 1  | chr1_12082771   | 19 | chr19_10108850  | 10.8    | 7.182 | 0.007364 | COL5A3       | MIIP         |
| 18 | chr18_12979041  | 20 | chr20_48562549  | 7.729   | 7.179 | 0.007375 | RNF114       | SEH1L        |
| 1  | chr1_152760075  | 17 | chr17_78269304  | 3.306   | 7.179 | 0.007378 | LCE1E        | RNF213       |
| 2  | chr2_163137871  | 12 | chr12_112479891 | 0.271   | 7.178 | 0.007381 | IFIH1        | NAA25        |
| 10 | chr10_81060474  | 16 | chr16_11003157  | 0.3921  | 7.178 | 0.007382 | CIITA        | ZMIZ1        |
| 5  | chr5_131729546  | 12 | chr12_56384687  | 3.828   | 7.176 | 0.007388 | RAB5B        | SLC22A5      |
| 5  | chr5_95748197   | 17 | chr17_38153473  | 0.142   | 7.176 | 0.007389 | LOC101929710 | PSMD3        |
| 11 | chr11_128426299 | 19 | chr19_53454387  | 0.04854 | 7.176 | 0.00739  | ETS1         | ZNF816       |
| 2  | chr2_103149248  | 12 | chr12_6562768   | 20.59   | 7.175 | 0.007392 | SLC9A4       | TAPBPL       |
| 1  | chr1_152329369  | 16 | chr16_31272988  | 2.585   | 7.174 | 0.007397 | FLG2         | ITGAM        |
| 4  | chr4_103455084  | 17 | chr17_78178182  | 2.664   | 7.174 | 0.007398 | CARD14       | NFKB1        |
| 5  | chr5_150444664  | 17 | chr17_78178189  | 3.774   | 7.173 | 0.007402 | CARD14       | TNIP1        |
| 3  | chr3_121647656  | 10 | chr10_75564556  | 3.871   | 7.169 | 0.007417 | NDST2        | SLC15A2      |
| 2  | chr2_163136771  | 4  | chr4_103553090  | 0.8779  | 7.169 | 0.007418 | IFIH1        | MANBA        |
| 2  | chr2_103040945  | 3  | chr3_121507383  | 9.181   | 7.168 | 0.007421 | IL18RAP      | IQCB1        |
| 2  | chr2_102984624  | 5  | chr5_79768604   | 0.3259  | 7.167 | 0.007425 | IL18R1       | ZFYVE16      |
| 1  | chr1_207013378  | 5  | chr5_96252998   | 3.765   | 7.167 | 0.007427 | ERAP2        | IL19         |
| 1  | chr1_234563556  | 19 | chr19_10091356  | 0.1064  | 7.166 | 0.007431 | COL5A3       | TARBP1       |
| 12 | chr12_6909419   | 16 | chr16_10998482  | 5.619   | 7.165 | 0.007436 | CD4          | CIITA        |
| 12 | chr12_56510705  | 17 | chr17_38029120  | 3.706   | 7.164 | 0.007439 | RPL41        | ZBPB2        |
| 5  | chr5_96235958   | 5  | chr5_96509055   | 2.475   | 7.164 | 0.007439 | ERAP2        | RIOK2        |
| 3  | chr3_121632018  | 16 | chr16_11444716  | 4.944   | 7.164 | 0.00744  | RMI2         | SLC15A2      |
| 12 | chr12_56384687  | 17 | chr17_40490762  | 4.938   | 7.163 | 0.007441 | RAB5B        | STAT3        |
| 5  | chr5_96117463   | 5  | chr5_158750013  | 5.685   | 7.162 | 0.007446 | ERAP1        | IL12B        |
| 2  | chr2_102960007  | 12 | chr12_111963030 | 5.088   | 7.162 | 0.007448 | ATXN2        | IL1RL1       |
| 5  | chr5_96125910   | 10 | chr10_89469017  | 3.786   | 7.161 | 0.007449 | ERAP1        | PAPSS2       |
| 2  | chr2_103006387  | 3  | chr3_121507383  | 9.169   | 7.16  | 0.007455 | IL18R1       | IQCB1        |
| 1  | chr1_234607104  | 17 | chr17_78093367  | 0.353   | 7.156 | 0.00747  | GAA          | TARBP1       |
| 5  | chr5_150441710  | 12 | chr12_6626369   | 5.159   | 7.156 | 0.007472 | NCAPD2       | TNIP1        |
| 16 | chr16_31273152  | 19 | chr19_53454387  | 0.2872  | 7.156 | 0.007473 | ITGAM        | ZNF816       |
| 2  | chr2_163253471  | 4  | chr4_103594918  | 0.1991  | 7.155 | 0.007475 | KCNH7        | MANBA        |
| 17 | chr17_38251343  | 17 | chr17_73871467  | 9.684   | 7.154 | 0.007479 | NR1D1        | TRIM47       |
| 1  | chr1_234584446  | 19 | chr19_10091356  | 0.1066  | 7.154 | 0.00748  | COL5A3       | TARBP1       |
| 3  | chr3_121810428  | 5  | chr5_96121715   | 2.609   | 7.154 | 0.00748  | CD86         | ERAP1        |
| 2  | chr2_102968007  | 6  | chr6_111887624  | 0.4094  | 7.152 | 0.00749  | IL1RL1       | TRAF3IP2-AS1 |
| 1  | chr1_152759678  | 1  | chr1_206972442  | 0.5219  | 7.15  | 0.007496 | IL19         | LCE1E        |
| 2  | chr2_103040182  | 6  | chr6_111887624  | 0.3898  | 7.147 | 0.007508 | IL18RAP      | TRAF3IP2-AS1 |
| 1  | chr1_207010261  | 17 | chr17_40481529  | 0.1852  | 7.145 | 0.007517 | IL19         | STAT3        |
| 5  | chr5_96118852   | 17 | chr17_26105797  | 3.93    | 7.145 | 0.007517 | ERAP1        | NOS2         |
| 19 | chr19_49540288  | 20 | chr20_48599549  | 3.563   | 7.144 | 0.00752  | SNAI1        | SNAR-G1      |
| 17 | chr17_78178189  | 19 | chr19_10812818  | 0.2077  | 7.144 | 0.007522 | CARD14       | QTRT1        |
| 1  | chr1_152759678  | 2  | chr2_62228016   | 0.1819  | 7.144 | 0.007523 | COMMD1       | LCE1E        |
| 1  | chr1_67793936   | 2  | chr2_103125457  | 0.1677  | 7.142 | 0.007529 | IL12RB2      | SLC9A4       |
| 17 | chr17_78166385  | 21 | chr21_34876635  | 3.796   | 7.142 | 0.007529 | CARD14       | GART         |
| 5  | chr5_158705065  | 17 | chr17_74075488  | 0.2809  | 7.142 | 0.007529 | UBLCP1       | ZACN         |
| 2  | chr2_163134148  | 17 | chr17_38063381  | 0.105   | 7.14  | 0.007538 | GSDMB        | IFIH1        |

|    |                |    |                 |        |       |          |              |              |
|----|----------------|----|-----------------|--------|-------|----------|--------------|--------------|
| 5  | chr5_96232222  | 10 | chr10_75564556  | 3.548  | 7.139 | 0.007541 | ERAP2        | NDST2        |
| 2  | chr2_103006448 | 12 | chr12_6928439   | 10.49  | 7.139 | 0.007542 | CD4          | IL18R1       |
| 2  | chr2_163137683 | 12 | chr12_112479891 | 0.268  | 7.138 | 0.007546 | IFIH1        | NAA25        |
| 2  | chr2_102968007 | 17 | chr17_38024626  | 0.8815 | 7.138 | 0.007548 | IL1RL1       | ZPBP2        |
| 14 | chr14_35761675 | 20 | chr20_48562657  | 0.2673 | 7.137 | 0.007552 | PSMA6        | RNF114       |
| 2  | chr2_163253471 | 4  | chr4_103594938  | 0.1996 | 7.135 | 0.007558 | KCNH7        | MANBA        |
| 2  | chr2_163136771 | 2  | chr2_163374437  | 0.2436 | 7.13  | 0.00758  | IFIH1        | KCNH7        |
| 12 | chr12_6604632  | 19 | chr19_49206631  | 3.399  | 7.13  | 0.007581 | FUT2         | NCAPD2       |
| 17 | chr17_38028617 | 18 | chr18_12984340  | 0.1034 | 7.128 | 0.007588 | SEH1L        | ZPBP2        |
| 5  | chr5_131796312 | 19 | chr19_10104154  | 5.544  | 7.128 | 0.007591 | C5orf56      | COL5A3       |
| 1  | chr1_158990412 | 12 | chr12_6959859   | 7.788  | 7.126 | 0.007596 | CDCA3        | IFI16        |
| 5  | chr5_96117300  | 9  | chr9_32631356   | 3.538  | 7.126 | 0.007596 | ERAP1        | TAF1L        |
| 1  | chr1_67845536  | 2  | chr2_103040945  | 0.2688 | 7.126 | 0.007598 | IL12RB2      | IL18RAP      |
| 5  | chr5_95748197  | 17 | chr17_38153554  | 0.143  | 7.126 | 0.007598 | LOC101929710 | PSMD3        |
| 1  | chr1_7863119   | 2  | chr2_62728046   | 4.608  | 7.125 | 0.007601 | PER3         | TMEM17       |
| 1  | chr1_234582685 | 16 | chr16_11444716  | 3.44   | 7.123 | 0.007608 | RMI2         | TARBP1       |
| 5  | chr5_96124296  | 18 | chr18_61652376  | 8.121  | 7.123 | 0.007611 | ERAP1        | SERPINB8     |
| 1  | chr1_67838319  | 20 | chr20_48599549  | 7.711  | 7.123 | 0.007612 | IL12RB2      | SNAI1        |
| 1  | chr1_152484245 | 12 | chr12_6182753   | 1.738  | 7.122 | 0.007614 | LCE5A        | VWF          |
| 3  | chr3_121647656 | 12 | chr12_56748703  | 0.2217 | 7.122 | 0.007616 | SLC15A2      | STAT2        |
| 2  | chr2_103006448 | 18 | chr18_12978733  | 1.167  | 7.121 | 0.007617 | IL18R1       | SEH1L        |
| 5  | chr5_96237114  | 11 | chr11_9817519   | 3.924  | 7.12  | 0.007621 | ERAP2        | SBF2-AS1     |
| 5  | chr5_96339273  | 17 | chr17_40854559  | 2.35   | 7.12  | 0.007621 | EZH1         | LNPEP        |
| 12 | chr12_56398776 | 17 | chr17_38173143  | 0.1298 | 7.12  | 0.007624 | CSF3         | SUOX         |
| 6  | chr6_138198365 | 17 | chr17_38063381  | 0.1717 | 7.119 | 0.007629 | GSDMB        | TNFAIP3      |
| 4  | chr4_103488278 | 17 | chr17_78178170  | 3.079  | 7.117 | 0.007634 | CARD14       | NFKB1        |
| 1  | chr1_234563556 | 16 | chr16_31372562  | 0.1531 | 7.117 | 0.007636 | ITGAX        | TARBP1       |
| 4  | chr4_103561106 | 19 | chr19_10444602  | 0.1592 | 7.117 | 0.007637 | ICAM3        | MANBA        |
| 3  | chr3_101571958 | 17 | chr17_40459737  | 1.512  | 7.116 | 0.007639 | NFKBIZ       | STAT5A       |
| 17 | chr17_26116896 | 17 | chr17_78222239  | 0.3619 | 7.114 | 0.00765  | NOS2         | SLC26A11     |
| 1  | chr1_67816686  | 21 | chr21_34876708  | 0.1712 | 7.113 | 0.007652 | GART         | IL12RB2      |
| 4  | chr4_103534560 | 5  | chr5_132037895  | 4.42   | 7.113 | 0.007652 | KIF3A        | NFKB1        |
| 1  | chr1_8074305   | 19 | chr19_10104272  | 3.315  | 7.112 | 0.007657 | COL5A3       | ERRFI1       |
| 2  | chr2_102997884 | 17 | chr17_77753128  | 20.32  | 7.111 | 0.007659 | CBX2         | IL18R1       |
| 1  | chr1_158987941 | 17 | chr17_26116566  | 0.1875 | 7.111 | 0.007662 | IFI16        | NOS2         |
| 5  | chr5_96225009  | 10 | chr10_81060474  | 7.334  | 7.11  | 0.007664 | ERAP2        | ZMIZ1        |
| 1  | chr1_152732436 | 12 | chr12_56745105  | 0.2829 | 7.11  | 0.007665 | KPRP         | STAT2        |
| 1  | chr1_152326556 | 2  | chr2_163136727  | 5.72   | 7.11  | 0.007667 | FLG2         | IFIH1        |
| 17 | chr17_26116743 | 17 | chr17_38029120  | 0.3957 | 7.109 | 0.007669 | NOS2         | ZPBP2        |
| 1  | chr1_152681703 | 2  | chr2_61108996   | 4.603  | 7.108 | 0.007673 | LCE4A        | REL          |
| 2  | chr2_62733253  | 6  | chr6_111922466  | 2.471  | 7.108 | 0.007673 | TMEM17       | TRAF3IP2-AS1 |
| 1  | chr1_152286357 | 17 | chr17_38153554  | 0.3088 | 7.107 | 0.00768  | FLG          | PSMD3        |
| 2  | chr2_163361222 | 10 | chr10_81060474  | 0.1746 | 7.105 | 0.007685 | KCNH7        | ZMIZ1        |
| 4  | chr4_103514445 | 12 | chr12_6619794   | 2.729  | 7.104 | 0.00769  | NCAPD2       | NFKB1        |
| 1  | chr1_234565787 | 16 | chr16_31372562  | 0.1534 | 7.104 | 0.007693 | ITGAX        | TARBP1       |
| 2  | chr2_62728105  | 14 | chr14_35872307  | 1.459  | 7.102 | 0.007699 | NFKBIA       | TMEM17       |
| 2  | chr2_103090127 | 5  | chr5_150497409  | 0.1855 | 7.102 | 0.0077   | ANXA6        | SLC9A4       |
| 3  | chr3_101484257 | 12 | chr12_6483851   | 8.988  | 7.101 | 0.007703 | CEP97        | SCNN1A       |
| 6  | chr6_138198365 | 17 | chr17_38029120  | 0.1721 | 7.101 | 0.007704 | TNFAIP3      | ZPBP2        |
| 1  | chr1_11805771  | 12 | chr12_6626369   | 0.1188 | 7.101 | 0.007705 | AGTRAP       | NCAPD2       |
| 1  | chr1_206239547 | 2  | chr2_102967928  | 3.181  | 7.1   | 0.007707 | C1orf186     | IL1RL1       |
| 2  | chr2_62733253  | 5  | chr5_131995833  | 3.55   | 7.1   | 0.007707 | IL13         | TMEM17       |
| 3  | chr3_101450689 | 12 | chr12_6604076   | 2.66   | 7.1   | 0.007708 | CEP97        | NCAPD2       |
| 2  | chr2_102960007 | 17 | chr17_40854482  | 4.352  | 7.1   | 0.007709 | EZH1         | IL1RL1       |
| 1  | chr1_159023338 | 5  | chr5_96125910   | 2.34   | 7.098 | 0.007716 | ERAP1        | IFI16        |
| 5  | chr5_96125910  | 19 | chr19_10444602  | 2.664  | 7.098 | 0.007716 | ERAP1        | ICAM3        |
| 2  | chr2_102984671 | 14 | chr14_35871287  | 3.923  | 7.098 | 0.007717 | IL18R1       | NFKBIA       |
| 12 | chr12_6483851  | 17 | chr17_78117807  | 0.7834 | 7.098 | 0.007719 | EIF4A3       | SCNN1A       |
| 2  | chr2_103006448 | 17 | chr17_26125911  | 0.104  | 7.097 | 0.007719 | IL18R1       | NOS2         |
| 17 | chr17_73559816 | 19 | chr19_10114033  | 2.09   | 7.097 | 0.00772  | COL5A3       | LLGL2        |
| 4  | chr4_103455084 | 17 | chr17_78178189  | 2.656  | 7.097 | 0.007721 | CARD14       | NFKB1        |
| 1  | chr1_234582685 | 4  | chr4_103561106  | 5.158  | 7.097 | 0.007722 | MANBA        | TARBP1       |
| 5  | chr5_96232222  | 11 | chr11_9817519   | 3.914  | 7.096 | 0.007724 | ERAP2        | SBF2-AS1     |
| 3  | chr3_121632036 | 5  | chr5_96252998   | 0.2379 | 7.096 | 0.007725 | ERAP2        | SLC15A2      |

|    |                 |    |                 |         |       |          |                   |          |
|----|-----------------|----|-----------------|---------|-------|----------|-------------------|----------|
| 1  | chr1_12249031   | 3  | chr3_169485997  | 0.2958  | 7.096 | 0.007727 | ACTRT3            | TNFRSF1B |
| 1  | chr1_207014445  | 2  | chr2_103125457  | 5.47    | 7.096 | 0.007727 | IL19              | SLC9A4   |
| 1  | chr1_152286908  | 3  | chr3_121647656  | 0.5496  | 7.095 | 0.007773 | FLG               | SLC15A2  |
| 17 | chr17_38031714  | 17 | chr17_38073517  | 0.168   | 7.095 | 0.007732 | GSDMB             | ZBP2     |
| 2  | chr2_102957348  | 4  | chr4_103531882  | 0.1955  | 7.094 | 0.007734 | IL1RL1            | NFKB1    |
| 2  | chr2_103040177  | 12 | chr12_6604632   | 0.1613  | 7.093 | 0.007739 | IL18RAP           | NCAPD2   |
| 12 | chr12_6483463   | 17 | chr17_40914660  | 6.736   | 7.093 | 0.00774  | RAMP2             | SCNN1A   |
| 12 | chr12_6635276   | 17 | chr17_38029120  | 0.1956  | 7.092 | 0.007741 | NCAPD2            | ZBP2     |
| 1  | chr1_12249031   | 16 | chr16_10998701  | 2.682   | 7.092 | 0.007744 | CIITA             | TNFRSF1B |
| 2  | chr2_103040177  | 21 | chr21_34805286  | 0.1224  | 7.092 | 0.007744 | IFNGR2            | IL18RAP  |
| 1  | chr1_78024514   | 5  | chr5_96121994   | 3.596   | 7.091 | 0.007747 | AK5               | ERAP1    |
| 1  | chr1_158815484  | 4  | chr4_103534560  | 0.2766  | 7.091 | 0.007748 | MNDA              | NFKB1    |
| 12 | chr12_6635276   | 17 | chr17_38024626  | 0.1956  | 7.09  | 0.007752 | NCAPD2            | ZBP2     |
| 12 | chr12_6500105   | 18 | chr18_61652376  | 4.872   | 7.089 | 0.007755 | LTBR              | SERPINB8 |
| 5  | chr5_79374582   | 18 | chr18_12984340  | 0.1784  | 7.089 | 0.007755 | CTD-220I18.1      | SEH1L    |
| 1  | chr1_158986477  | 19 | chr19_10081542  | 1.421   | 7.089 | 0.007756 | COL5A3            | IFI16    |
| 3  | chr3_121658343  | 5  | chr5_96222183   | 3.924   | 7.087 | 0.007763 | ERAP2             | SLC15A2  |
| 5  | chr5_150704781  | 17 | chr17_38173143  | 0.4618  | 7.087 | 0.007764 | CSF3              | SLC36A2  |
| 5  | chr5_158705065  | 17 | chr17_40717855  | 3.006   | 7.087 | 0.007764 | COASY             | UBLCP1   |
| 1  | chr1_234607104  | 10 | chr10_102240881 | 0.04723 | 7.087 | 0.007766 | TARBP1            | WNT8B    |
| 5  | chr5_131671659  | 6  | chr6_138192745  | 8.705   | 7.087 | 0.007766 | SLC22A4           | TNFAIP3  |
| 2  | chr2_102955683  | 19 | chr19_10084473  | 2.507   | 7.086 | 0.007768 | COL5A3            | IL1RL1   |
| 2  | chr2_61175260   | 17 | chr17_40481529  | 0.2587  | 7.085 | 0.007771 | PUS10             | STAT3    |
| 5  | chr5_40269900   | 5  | chr5_96513471   | 4.008   | 7.085 | 0.007772 | LINC00603, PTGER4 | RIOK2    |
| 1  | chr1_12082781   | 17 | chr17_38153473  | 3.588   | 7.085 | 0.007775 | MIIP              | PSMD3    |
| 2  | chr2_163149965  | 4  | chr4_103553090  | 0.8734  | 7.084 | 0.007778 | IFIH1             | MANBA    |
| 17 | chr17_26084532  | 19 | chr19_10421169  | 6.08    | 7.082 | 0.007787 | FDX1L             | NOS2     |
| 1  | chr1_12249031   | 12 | chr12_56385238  | 5.679   | 7.08  | 0.007794 | RAB5B             | TNFRSF1B |
| 5  | chr5_96509055   | 13 | chr13_40293984  | 5.202   | 7.08  | 0.007794 | COG6              | RIOK2    |
| 1  | chr1_234563556  | 5  | chr5_79741181   | 8.124   | 7.08  | 0.007795 | TARBP1            | ZFYVE16  |
| 2  | chr2_163291617  | 12 | chr12_56825260  | 0.1407  | 7.08  | 0.007796 | KCNH7             | TIMELESS |
| 11 | chr11_128359280 | 17 | chr17_73871467  | 0.3067  | 7.079 | 0.007799 | ETS1              | TRIM47   |
| 4  | chr4_103557251  | 17 | chr17_76425289  | 3.867   | 7.079 | 0.007801 | DNAH17            | MANBA    |
| 10 | chr10_81058027  | 12 | chr12_10251227  | 0.3469  | 7.078 | 0.007804 | CLEC1A            | ZMIZ1    |
| 6  | chr6_138198365  | 17 | chr17_38024626  | 0.1726  | 7.077 | 0.007806 | TNFAIP3           | ZBP2     |
| 8  | chr8_3263616    | 12 | chr12_6604076   | 6.069   | 7.077 | 0.007806 | CSMD1             | NCAPD2   |
| 5  | chr5_96121994   | 10 | chr10_75157049  | 4.889   | 7.077 | 0.007807 | ANXA7             | ERAP1    |
| 6  | chr6_111896954  | 19 | chr19_53454387  | 9.431   | 7.077 | 0.007809 | TRAF3IP2          | ZNF816   |
| 20 | chr20_48524827  | 21 | chr21_34876813  | 3.186   | 7.076 | 0.007813 | GART              | SPATA2   |
| 2  | chr2_62728046   | 19 | chr19_49540044  | 0.2456  | 7.075 | 0.007816 | CGB1              | TMEM17   |
| 5  | chr5_150566792  | 11 | chr11_65771097  | 1.796   | 7.075 | 0.007817 | BANF1             | CCDC69   |
| 3  | chr3_121774331  | 14 | chr14_35596323  | 0.0827  | 7.074 | 0.007819 | CD86              | KIAA0391 |
| 5  | chr5_96121994   | 5  | chr5_131825142  | 0.452   | 7.074 | 0.007823 | ERAP1             | IRF1     |
| 14 | chr14_35596323  | 20 | chr20_48467560  | 1.256   | 7.073 | 0.007824 | KIAA0391          | SLC9A8   |
| 5  | chr5_96513471   | 6  | chr6_138196798  | 3.194   | 7.068 | 0.007846 | RIOK2             | TNFAIP3  |
| 12 | chr12_6635276   | 17 | chr17_38031714  | 0.1925  | 7.067 | 0.00785  | NCAPD2            | ZBP2     |
| 2  | chr2_62112220   | 4  | chr4_103514445  | 0.3434  | 7.067 | 0.007852 | CCT4              | NFKB1    |
| 4  | chr4_103557219  | 19 | chr19_49693697  | 1.73    | 7.064 | 0.007863 | MANBA             | TRPM4    |
| 1  | chr1_234607086  | 12 | chr12_6494299   | 10.67   | 7.064 | 0.007866 | LTBR              | TARBP1   |
| 2  | chr2_163137871  | 4  | chr4_103557219  | 1.136   | 7.063 | 0.007868 | IFIH1             | MANBA    |
| 17 | chr17_26110007  | 17 | chr17_78180618  | 0.3054  | 7.063 | 0.00787  | CARD14            | NOS2     |
| 2  | chr2_102984671  | 12 | chr12_56526164  | 0.2555  | 7.061 | 0.007876 | ESYT1             | IL18R1   |
| 2  | chr2_103006448  | 18 | chr18_12978823  | 4.924   | 7.061 | 0.007877 | IL18R1            | SEH1L    |
| 4  | chr4_103557219  | 12 | chr12_6131010   | 3.026   | 7.061 | 0.007877 | MANBA             | VWF      |
| 2  | chr2_103011237  | 4  | chr4_103531882  | 0.1864  | 7.06  | 0.007883 | IL18R1            | NFKB1    |
| 11 | chr11_63974554  | 19 | chr19_10108850  | 0.2612  | 7.057 | 0.007893 | COL5A3            | FERMT3   |
| 11 | chr11_9802144   | 18 | chr18_12978733  | 6.167   | 7.058 | 0.007893 | SBF2-AS1          | SEH1L    |
| 1  | chr1_152770589  | 13 | chr13_40239296  | 0.2279  | 7.057 | 0.007896 | COG6              | LCE1D    |
| 1  | chr1_11917786   | 19 | chr19_53454387  | 8.889   | 7.057 | 0.007897 | NPPB              | ZNF816   |
| 1  | chr1_207013378  | 5  | chr5_96117300   | 4.234   | 7.057 | 0.007898 | ERAP1             | IL19     |
| 5  | chr5_96124447   | 21 | chr21_36079802  | 0.4502  | 7.056 | 0.007902 | CLIC6             | ERAP1    |
| 10 | chr10_81056383  | 13 | chr13_40233478  | 5.48    | 7.054 | 0.007907 | COG6              | ZMIZ1    |
| 16 | chr16_31272988  | 17 | chr17_78178182  | 2.328   | 7.054 | 0.007907 | CARD14            | ITGAM    |
| 2  | chr2_102632337  | 17 | chr17_78180618  | 2.57    | 7.053 | 0.007915 | CARD14            | IL1R2    |



|    |                 |    |                 |         |       |          |              |              |
|----|-----------------|----|-----------------|---------|-------|----------|--------------|--------------|
| 1  | chr1_158990412  | 17 | chr17_78346595  | 0.3127  | 7.052 | 0.007919 | IFI16        | LOC100294362 |
| 4  | chr4_103514445  | 12 | chr12_6861043   | 0.9232  | 7.051 | 0.00792  | MLF2         | NFKB1        |
| 10 | chr10_75136022  | 16 | chr16_31122571  | 10.83   | 7.051 | 0.007922 | ANXA7        | BCKDK        |
| 2  | chr2_163361103  | 5  | chr5_96132795   | 5.892   | 7.051 | 0.007922 | ERAP1        | KCNH7        |
| 5  | chr5_96139250   | 5  | chr5_96512894   | 0.3245  | 7.051 | 0.007923 | ERAP1        | RIOK2        |
| 1  | chr1_172633592  | 2  | chr2_103040177  | 2.323   | 7.05  | 0.007925 | FASLG        | IL18RAP      |
| 2  | chr2_102998279  | 18 | chr18_12978823  | 4.918   | 7.05  | 0.007925 | IL18R1       | SEH1L        |
| 1  | chr1_159002222  | 17 | chr17_38153711  | 3.119   | 7.05  | 0.007928 | IFI16        | PSMD3        |
| 14 | chr14_35596323  | 17 | chr17_40459737  | 0.8351  | 7.049 | 0.007932 | KIAA0391     | STAT5A       |
| 16 | chr16_31332719  | 17 | chr17_78178830  | 0.2562  | 7.048 | 0.007935 | CARD14       | ITGAM        |
| 9  | chr9_32633310   | 17 | chr17_38173143  | 0.2593  | 7.047 | 0.007942 | CSF3         | TAF1L        |
| 1  | chr1_8045100    | 16 | chr16_30938811  | 6.082   | 7.045 | 0.00795  | FBXL19       | PARK7        |
| 2  | chr2_163149896  | 11 | chr11_63920076  | 4.223   | 7.045 | 0.007951 | IFIH1        | MACROD1      |
| 12 | chr12_112499067 | 17 | chr17_78180618  | 5.931   | 7.044 | 0.007953 | CARD14       | NAA25        |
| 5  | chr5_96222185   | 10 | chr10_75564556  | 3.548   | 7.043 | 0.007958 | ERAP2        | NDST2        |
| 1  | chr1_234563556  | 10 | chr10_81058144  | 3.386   | 7.043 | 0.007959 | TARBP1       | ZMIZ1        |
| 6  | chr6_111896798  | 19 | chr19_10464687  | 0.6627  | 7.043 | 0.007959 | TRAF3IP2-AS1 | TYK2         |
| 1  | chr1_159002778  | 3  | chr3_101450832  | 0.2308  | 7.041 | 0.007967 | CEP97        | IFI16        |
| 2  | chr2_102968362  | 17 | chr17_38153473  | 0.8928  | 7.041 | 0.007967 | IL1RL1       | PSMD3        |
| 1  | chr1_234584446  | 3  | chr3_121646806  | 0.8213  | 7.04  | 0.007969 | SLC15A2      | TARBP1       |
| 12 | chr12_56737245  | 16 | chr16_30936081  | 0.1637  | 7.04  | 0.007972 | FBXL19       | STAT2        |
| 1  | chr1_152732311  | 19 | chr19_49447713  | 20.81   | 7.039 | 0.007977 | DHDH         | KPRP         |
| 1  | chr1_159002778  | 16 | chr16_31332719  | 0.315   | 7.038 | 0.007978 | IFI16        | ITGAM        |
| 4  | chr4_103557219  | 16 | chr16_31332719  | 0.3065  | 7.038 | 0.007981 | ITGAM        | MANBA        |
| 5  | chr5_131671659  | 17 | chr17_40481529  | 2.383   | 7.038 | 0.007982 | SLC22A4      | STAT3        |
| 4  | chr4_103557219  | 12 | chr12_6619794   | 2.74    | 7.037 | 0.007986 | MANBA        | NCAPD2       |
| 5  | chr5_158705065  | 5  | chr5_158745889  | 3.854   | 7.036 | 0.007989 | IL12B        | UBLCP1       |
| 2  | chr2_60695977   | 2  | chr2_103130373  | 0.1774  | 7.035 | 0.007992 | BCL11A       | SLC9A4       |
| 5  | chr5_150566792  | 17 | chr17_78166385  | 0.8908  | 7.034 | 0.007997 | CARD14       | CCDC69       |
| 1  | chr1_67292566   | 12 | chr12_6562768   | 0.2334  | 7.034 | 0.007999 | TAPBPL       | WDR78        |
| 17 | chr17_38024626  | 17 | chr17_38073517  | 0.1693  | 7.033 | 0.008    | GSDMB        | ZBP2         |
| 1  | chr1_207010261  | 17 | chr17_38153473  | 0.2209  | 7.032 | 0.008004 | IL19         | PSMD3        |
| 1  | chr1_152484245  | 2  | chr2_103057895  | 11.63   | 7.032 | 0.008008 | IL18RAP      | LCE5A        |
| 1  | chr1_152552160  | 17 | chr17_38031714  | 2.07    | 7.032 | 0.008008 | LCE3D        | ZBP2         |
| 1  | chr1_158990412  | 11 | chr11_9457785   | 0.4155  | 7.032 | 0.008008 | IFI16        | IPO7         |
| 2  | chr2_103095494  | 12 | chr12_56437315  | 0.06124 | 7.032 | 0.008008 | RPS26        | SLC9A4       |
| 1  | chr1_67838353   | 5  | chr5_96237114   | 2.387   | 7.031 | 0.00801  | ERAP2        | IL12RB2      |
| 1  | chr1_152326819  | 4  | chr4_103514445  | 4.922   | 7.03  | 0.008016 | FLG2         | NFKB1        |
| 5  | chr5_96509055   | 5  | chr5_150512128  | 0.1856  | 7.029 | 0.008018 | ANXA6        | RIOK2        |
| 2  | chr2_103006448  | 3  | chr3_101574738  | 8.557   | 7.028 | 0.008022 | IL18R1       | NFKBIZ       |
| 4  | chr4_103553090  | 16 | chr16_11051783  | 0.4077  | 7.028 | 0.008024 | CLEC16A      | MANBA        |
| 2  | chr2_103125457  | 19 | chr19_10479135  | 0.2408  | 7.028 | 0.008026 | SLC9A4       | TYK2         |
| 1  | chr1_7910969    | 1  | chr1_158987941  | 0.3242  | 7.026 | 0.008032 | IFI16        | UTS2         |
| 17 | chr17_78269173  | 20 | chr20_48524827  | 0.3384  | 7.026 | 0.008032 | RNF213       | SPATA2       |
| 2  | chr2_61175305   | 17 | chr17_40459737  | 4.707   | 7.026 | 0.008034 | PUS10        | STAT5A       |
| 5  | chr5_96129512   | 10 | chr10_80976056  | 4.208   | 7.025 | 0.008038 | ERAP1        | ZMIZ1        |
| 16 | chr16_10998482  | 17 | chr17_38024626  | 1.13    | 7.025 | 0.008039 | CIITA        | ZBP2         |
| 2  | chr2_103125338  | 20 | chr20_48599549  | 0.0628  | 7.025 | 0.008039 | SLC9A4       | SNAI1        |
| 1  | chr1_152659194  | 6  | chr6_138195723  | 0.5226  | 7.024 | 0.008043 | LCE2B        | TNFAIP3      |
| 2  | chr2_103125466  | 19 | chr19_10479135  | 0.2495  | 7.022 | 0.008051 | SLC9A4       | TYK2         |
| 2  | chr2_62733253   | 4  | chr4_103516049  | 2.807   | 7.02  | 0.008061 | NFKB1        | TMEM17       |
| 2  | chr2_102979175  | 3  | chr3_45187671   | 0.3989  | 7.019 | 0.008067 | CDCP1        | IL18R1       |
| 5  | chr5_96119536   | 20 | chr20_48524827  | 0.5929  | 7.017 | 0.008073 | ERAP1        | SPATA2       |
| 12 | chr12_56491659  | 17 | chr17_78178182  | 0.2015  | 7.017 | 0.008076 | CARD14       | ERBB3        |
| 4  | chr4_103504015  | 17 | chr17_40459737  | 4.316   | 7.016 | 0.008077 | NFKB1        | STAT5A       |
| 2  | chr2_103011237  | 21 | chr21_34805286  | 0.123   | 7.015 | 0.008081 | IFNGR2       | IL18R1       |
| 1  | chr1_234563556  | 5  | chr5_131728231  | 0.2364  | 7.015 | 0.008082 | SLC22A5      | TARBP1       |
| 1  | chr1_8073450    | 17 | chr17_78178170  | 0.1814  | 7.014 | 0.00809  | CARD14       | ERRFI1       |
| 5  | chr5_96117300   | 19 | chr19_10100047  | 2.186   | 7.013 | 0.00809  | COL5A3       | ERAP1        |
| 2  | chr2_102968211  | 11 | chr11_128360376 | 6.989   | 7.013 | 0.008092 | ETS1         | IL1RL1       |
| 1  | chr1_11805813   | 21 | chr21_34876708  | 3.744   | 7.012 | 0.008095 | AGTRAP       | GART         |
| 1  | chr1_67648596   | 17 | chr17_78178170  | 0.8104  | 7.012 | 0.008095 | CARD14       | IL23R        |
| 10 | chr10_80968433  | 12 | chr12_6636392   | 6.119   | 7.012 | 0.008096 | NCAPD2       | ZMIZ1        |
| 1  | chr1_8029420    | 1  | chr1_234563556  | 4.478   | 7.012 | 0.008097 | PARK7        | TARBP1       |

|    |                 |    |                 |         |       |          |           |          |
|----|-----------------|----|-----------------|---------|-------|----------|-----------|----------|
| 12 | chr12_6604076   | 19 | chr19_10090708  | 7.708   | 7.012 | 0.008097 | COL5A3    | NCAPD2   |
| 5  | chr5_158705065  | 12 | chr12_56398287  | 2.991   | 7.011 | 0.008102 | SUOX      | UBLCP1   |
| 5  | chr5_150578618  | 17 | chr17_38153473  | 3.682   | 7.01  | 0.008104 | CCDC69    | PSMD3    |
| 5  | chr5_96237114   | 19 | chr19_10112594  | 2.178   | 7.01  | 0.008104 | COL5A3    | ERAP2    |
| 1  | chr1_67195074   | 2  | chr2_103130373  | 3.217   | 7.01  | 0.008107 | SGIP1     | SLC9A4   |
| 12 | chr12_6562768   | 17 | chr17_40485964  | 5.199   | 7.008 | 0.008113 | STAT3     | TAPBPL   |
| 10 | chr10_89469270  | 12 | chr12_6182753   | 9.748   | 7.008 | 0.008116 | PAPSS2    | VWF      |
| 12 | chr12_6204763   | 12 | chr12_6483851   | 3.381   | 7.005 | 0.008129 | SCNN1A    | VWF      |
| 12 | chr12_6495637   | 19 | chr19_10104272  | 0.4562  | 7.004 | 0.008132 | COL5A3    | LTBR     |
| 3  | chr3_101451315  | 12 | chr12_56384687  | 7.956   | 7.004 | 0.008132 | CEP97     | RAB5B    |
| 2  | chr2_163136771  | 17 | chr17_78156547  | 10.09   | 7.004 | 0.008133 | CARD14    | IFIH1    |
| 13 | chr13_40293469  | 17 | chr17_78178830  | 2.289   | 7.003 | 0.008137 | CARD14    | COG6     |
| 1  | chr1_152282465  | 1  | chr1_152732436  | 0.4111  | 7.003 | 0.008139 | FLG       | KPRP     |
| 16 | chr16_11016173  | 17 | chr17_78178170  | 4.862   | 7.002 | 0.008142 | CARD14    | CIITA    |
| 5  | chr5_96232222   | 19 | chr19_10112594  | 2.177   | 7.001 | 0.008146 | COL5A3    | ERAP2    |
| 2  | chr2_102967928  | 5  | chr5_79768604   | 0.3302  | 7.001 | 0.008147 | IL1RL1    | ZFYVE16  |
| 6  | chr6_394943     | 12 | chr12_6861043   | 0.3182  | 6.999 | 0.008156 | IRF4      | MLF2     |
| 12 | chr12_6167131   | 12 | chr12_6483463   | 0.4104  | 6.999 | 0.008157 | SCNN1A    | VWF      |
| 1  | chr1_7912870    | 16 | chr16_31095251  | 0.6766  | 6.998 | 0.008158 | PRSS53    | UTS2     |
| 16 | chr16_10992671  | 17 | chr17_78171944  | 0.4263  | 6.998 | 0.00816  | CARD14    | CIITA    |
| 16 | chr16_11141179  | 17 | chr17_78178182  | 0.1649  | 6.997 | 0.008165 | CARD14    | CLEC16A  |
| 2  | chr2_102644675  | 5  | chr5_96118852   | 2.824   | 6.996 | 0.008167 | ERAP1     | IL1R2    |
| 2  | chr2_102968356  | 11 | chr11_9879936   | 2.624   | 6.996 | 0.00817  | IL1RL1    | SBF2     |
| 1  | chr1_152681690  | 17 | chr17_40459737  | 0.2409  | 6.995 | 0.008176 | LCE4A     | STAT5A   |
| 1  | chr1_67195074   | 1  | chr1_158986225  | 2.186   | 6.994 | 0.008177 | IFI16     | SGIP1    |
| 6  | chr6_138195723  | 9  | chr9_32633861   | 17.51   | 6.993 | 0.008182 | TAF1L     | TNFAIP3  |
| 2  | chr2_102984671  | 14 | chr14_64896969  | 0.4621  | 6.993 | 0.008184 | IL18R1    | MIR548AZ |
| 5  | chr5_96139250   | 17 | chr17_73997521  | 0.2696  | 6.993 | 0.008184 | CDK3      | ERAP1    |
| 1  | chr1_8075575    | 16 | chr16_31095204  | 0.2393  | 6.992 | 0.008188 | ERF1      | PRSS53   |
| 2  | chr2_62728046   | 5  | chr5_131647989  | 2.728   | 6.99  | 0.008195 | LOC553103 | TMEM17   |
| 5  | chr5_150443005  | 20 | chr20_48599604  | 3.008   | 6.99  | 0.008198 | SNAI1     | TNIP1    |
| 17 | chr17_78178189  | 20 | chr20_48497562  | 2.067   | 6.99  | 0.008199 | CARD14    | SLC9A8   |
| 2  | chr2_102968356  | 8  | chr8_3205697    | 0.27    | 6.988 | 0.008204 | CSMD1     | IL1RL1   |
| 4  | chr4_103594938  | 5  | chr5_150443005  | 0.9242  | 6.988 | 0.008204 | MANBA     | TNIP1    |
| 16 | chr16_31230499  | 19 | chr19_10475652  | 4.48    | 6.988 | 0.008207 | TRIM72    | TYK2     |
| 11 | chr11_65487827  | 17 | chr17_40481529  | 3.349   | 6.985 | 0.008219 | RNASEH2C  | STAT3    |
| 1  | chr1_12249031   | 12 | chr12_111884628 | 3.859   | 6.983 | 0.008229 | SH2B3     | TNFRSF1B |
| 1  | chr1_152681704  | 16 | chr16_11009267  | 0.1323  | 6.982 | 0.008232 | CIITA     | LCE4A    |
| 4  | chr4_103594918  | 5  | chr5_150443005  | 0.9236  | 6.982 | 0.008232 | MANBA     | TNIP1    |
| 12 | chr12_122720489 | 14 | chr14_35761675  | 2.32    | 6.982 | 0.008234 | PSMA6     | VPS33A   |
| 1  | chr1_7879424    | 18 | chr18_12978733  | 4.666   | 6.981 | 0.008238 | PER3      | SEH1L    |
| 10 | chr10_80968326  | 17 | chr17_73871467  | 7.296   | 6.979 | 0.008246 | TRIM47    | ZMIZ1    |
| 1  | chr1_234573171  | 19 | chr19_10091356  | 0.1077  | 6.978 | 0.00825  | COL5A3    | TARBP1   |
| 4  | chr4_103534560  | 5  | chr5_150846896  | 0.2688  | 6.977 | 0.008255 | NFKB1     | SLC36A1  |
| 5  | chr5_150444664  | 17 | chr17_78178182  | 3.495   | 6.977 | 0.008257 | CARD14    | TNIP1    |
| 2  | chr2_163361222  | 5  | chr5_158750013  | 0.143   | 6.976 | 0.008262 | IL12B     | KCNH7    |
| 1  | chr1_152284277  | 17 | chr17_78178830  | 0.1695  | 6.975 | 0.008264 | CARD14    | FLG      |
| 1  | chr1_207078379  | 3  | chr3_121647656  | 2.872   | 6.975 | 0.008267 | FCMR      | SLC15A2  |
| 10 | chr10_89474665  | 17 | chr17_78180618  | 0.2533  | 6.975 | 0.008267 | CARD14    | PAPSS2   |
| 1  | chr1_8074204    | 2  | chr2_62733253   | 4.572   | 6.975 | 0.008268 | ERF1      | TMEM17   |
| 4  | chr4_103504015  | 16 | chr16_10998482  | 0.1882  | 6.974 | 0.008268 | CIITA     | NFKB1    |
| 1  | chr1_152484245  | 17 | chr17_73888273  | 0.707   | 6.974 | 0.008271 | LCE5A     | TRIM65   |
| 2  | chr2_103011237  | 10 | chr10_89472846  | 8.804   | 6.974 | 0.008272 | IL18R1    | PAPSS2   |
| 1  | chr1_67889571   | 3  | chr3_44881832   | 0.2614  | 6.973 | 0.008275 | KIF15     | SERBP1   |
| 17 | chr17_78180618  | 21 | chr21_34954851  | 1.158   | 6.972 | 0.00828  | CARD14    | DONSON   |
| 1  | chr1_159002222  | 3  | chr3_101450832  | 0.2393  | 6.971 | 0.008283 | CEP97     | IFI16    |
| 11 | chr11_65601560  | 12 | chr12_56436146  | 22.15   | 6.971 | 0.008283 | RPS26     | SNX32    |
| 5  | chr5_96249111   | 5  | chr5_150566792  | 4.925   | 6.971 | 0.008286 | CCDC69    | ERAP2    |
| 5  | chr5_150414388  | 17 | chr17_73888354  | 1.384   | 6.969 | 0.008294 | TNIP1     | TRIM65   |
| 17 | chr17_26116896  | 19 | chr19_49540044  | 0.237   | 6.967 | 0.008304 | CGB1      | NOS2     |
| 2  | chr2_103006448  | 7  | chr7_36927199   | 7.099   | 6.967 | 0.008304 | ELMO1     | IL18R1   |
| 3  | chr3_121647656  | 5  | chr5_79374767   | 4.632   | 6.966 | 0.008305 | SLC15A2   | THBS4    |
| 2  | chr2_163137683  | 11 | chr11_63920076  | 3.605   | 6.965 | 0.008311 | IFIH1     | MACROD1  |
| 2  | chr2_102804354  | 2  | chr2_163149896  | 0.05442 | 6.964 | 0.008317 | IFIH1     | IL1RL2   |

|    |                 |    |                 |         |       |          |         |          |
|----|-----------------|----|-----------------|---------|-------|----------|---------|----------|
| 16 | chr16_11444716  | 17 | chr17_40817512  | 2.161   | 6.964 | 0.008319 | RMI2    | TUBG2    |
| 2  | chr2_60695977   | 2  | chr2_103095494  | 0.1789  | 6.963 | 0.00832  | BCL11A  | SLC9A4   |
| 5  | chr5_96129512   | 17 | chr17_38079505  | 3.585   | 6.963 | 0.008322 | ERAP1   | ORMDL3   |
| 2  | chr2_163137695  | 2  | chr2_163374437  | 0.2499  | 6.963 | 0.008323 | IFIH1   | KCNH7    |
| 2  | chr2_61128196   | 2  | chr2_103090127  | 0.05713 | 6.962 | 0.008324 | REL     | SLC9A4   |
| 1  | chr1_152671505  | 2  | chr2_103040177  | 5.913   | 6.962 | 0.008325 | IL18RAP | LCE2A    |
| 5  | chr5_96121715   | 5  | chr5_150282783  | 0.2217  | 6.961 | 0.008329 | ERAP1   | ZNF300   |
| 5  | chr5_96112272   | 17 | chr17_73888354  | 2.6     | 6.961 | 0.00833  | ERAP1   | TRIM65   |
| 5  | chr5_96232222   | 17 | chr17_26110215  | 2.846   | 6.961 | 0.00833  | ERAP2   | NOS2     |
| 12 | chr12_56481494  | 14 | chr14_35761675  | 0.3523  | 6.961 | 0.008332 | ERBB3   | PSMA6    |
| 2  | chr2_102968007  | 12 | chr12_6155986   | 6.485   | 6.961 | 0.008332 | IL1RL1  | VWF      |
| 9  | chr9_32630600   | 19 | chr19_10114033  | 0.5142  | 6.96  | 0.008335 | COL5A3  | TAF1L    |
| 2  | chr2_103011237  | 12 | chr12_6637054   | 0.1629  | 6.96  | 0.008336 | IL18R1  | NCAPD2   |
| 2  | chr2_102968211  | 8  | chr8_3205697    | 0.2792  | 6.959 | 0.008338 | CSMD1   | IL1RL1   |
| 1  | chr1_152282280  | 19 | chr19_10114033  | 0.1561  | 6.959 | 0.008341 | COL5A3  | FLG      |
| 2  | chr2_103040945  | 8  | chr8_3265671    | 4.728   | 6.958 | 0.008344 | CSMD1   | IL18RAP  |
| 2  | chr2_61391608   | 12 | chr12_6562768   | 0.2247  | 6.957 | 0.00835  | C2orf74 | TAPBPL   |
| 12 | chr12_6959859   | 16 | chr16_31122571  | 12.41   | 6.956 | 0.008354 | BCKDK   | CDCA3    |
| 1  | chr1_12082631   | 19 | chr19_10464687  | 3.01    | 6.955 | 0.008357 | MIIP    | TYK2     |
| 1  | chr1_67889571   | 13 | chr13_40253646  | 0.2445  | 6.955 | 0.008357 | COG6    | SERBP1   |
| 5  | chr5_150566792  | 16 | chr16_31332665  | 0.1848  | 6.955 | 0.008357 | CCDC69  | ITGAM    |
| 1  | chr1_12249031   | 2  | chr2_61190047   | 2.807   | 6.955 | 0.008361 | PUS10   | TNFRSF1B |
| 5  | chr5_96513471   | 5  | chr5_132034936  | 0.4081  | 6.954 | 0.008363 | KIF3A   | RIOK2    |
| 11 | chr11_65422853  | 19 | chr19_10462323  | 2.009   | 6.954 | 0.008364 | RELA    | TYK2     |
| 12 | chr12_6562768   | 12 | chr12_56750204  | 1.426   | 6.954 | 0.008365 | STAT2   | TAPBPL   |
| 17 | chr17_73752557  | 19 | chr19_49206631  | 0.2987  | 6.953 | 0.008366 | FUT2    | ITGB4    |
| 2  | chr2_103040182  | 19 | chr19_49671451  | 3.017   | 6.953 | 0.008367 | IL18RAP | TRPM4    |
| 6  | chr6_138192761  | 17 | chr17_26094735  | 9.842   | 6.952 | 0.008371 | NOS2    | TNFAIP3  |
| 2  | chr2_102967928  | 3  | chr3_121634344  | 0.1906  | 6.951 | 0.008375 | IL1RL1  | SLC15A2  |
| 2  | chr2_102968211  | 17 | chr17_38153554  | 0.8913  | 6.951 | 0.008378 | IL1RL1  | PSMD3    |
| 1  | chr1_152286999  | 16 | chr16_10998482  | 0.2215  | 6.951 | 0.008379 | CIITA   | FLG      |
| 3  | chr3_121810428  | 5  | chr5_96222185   | 2.409   | 6.95  | 0.008383 | CD86    | ERAP2    |
| 16 | chr16_11444716  | 17 | chr17_26125933  | 3.697   | 6.949 | 0.008386 | NOS2    | RMI2     |
| 1  | chr1_207009910  | 17 | chr17_40481596  | 0.4895  | 6.949 | 0.008387 | IL19    | STAT3    |
| 1  | chr1_158990412  | 12 | chr12_6464958   | 0.3505  | 6.949 | 0.008388 | IFI16   | SCNN1A   |
| 3  | chr3_121647253  | 5  | chr5_150566792  | 5.86    | 6.948 | 0.008389 | CCDC69  | SLC15A2  |
| 5  | chr5_96129512   | 10 | chr10_75157049  | 5.398   | 6.948 | 0.008391 | ANXA7   | ERAP1    |
| 6  | chr6_138638331  | 10 | chr10_81056383  | 8.826   | 6.947 | 0.008396 | ARFGEF3 | ZMIZ1    |
| 1  | chr1_158986225  | 16 | chr16_11003860  | 0.1809  | 6.944 | 0.008409 | CIITA   | IFI16    |
| 17 | chr17_38251343  | 17 | chr17_73888354  | 9.393   | 6.944 | 0.008409 | NR1D1   | TRIM65   |
| 12 | chr12_56384687  | 13 | chr13_40325121  | 8.695   | 6.944 | 0.00841  | COG6    | RAB5B    |
| 12 | chr12_56737245  | 18 | chr18_12978733  | 0.231   | 6.944 | 0.008412 | SEHL    | STAT2    |
| 5  | chr5_96509055   | 11 | chr11_128426299 | 4.097   | 6.944 | 0.008412 | ETS1    | RIOK2    |
| 1  | chr1_158990274  | 17 | chr17_38031714  | 0.1657  | 6.943 | 0.008413 | IFI16   | ZBP2     |
| 1  | chr1_67195074   | 2  | chr2_103095494  | 3.09    | 6.943 | 0.008413 | SGIP1   | SLC9A4   |
| 7  | chr7_37251085   | 10 | chr10_101934235 | 3.057   | 6.943 | 0.008416 | ELMO1   | ERLIN1   |
| 14 | chr14_35761796  | 17 | chr17_26116896  | 0.1656  | 6.942 | 0.008417 | NOS2    | PSMA6    |
| 1  | chr1_158990412  | 19 | chr19_53357108  | 0.7036  | 6.942 | 0.008418 | IFI16   | ZNF468   |
| 2  | chr2_102984140  | 5  | chr5_96139250   | 4.897   | 6.942 | 0.008421 | ERAP1   | IL18R1   |
| 10 | chr10_81060474  | 16 | chr16_31098107  | 0.6655  | 6.941 | 0.008422 | PRSS53  | ZMIZ1    |
| 10 | chr10_101927016 | 12 | chr12_6861043   | 4.529   | 6.94  | 0.008428 | ERLIN1  | MLF2     |
| 1  | chr1_67666600   | 4  | chr4_103553090  | 4.412   | 6.94  | 0.008429 | IL23R   | MANBA    |
| 16 | chr16_11002982  | 17 | chr17_26116896  | 0.3349  | 6.94  | 0.008429 | CIITA   | NOS2     |
| 6  | chr6_138628800  | 10 | chr10_81058027  | 0.3972  | 6.94  | 0.00843  | ARFGEF3 | ZMIZ1    |
| 2  | chr2_163291617  | 6  | chr6_395246     | 3.45    | 6.938 | 0.008438 | IRF4    | KCNH7    |
| 16 | chr16_11141179  | 17 | chr17_78178170  | 5.814   | 6.938 | 0.00844  | CARD14  | CLEC16A  |
| 1  | chr1_152760075  | 8  | chr8_3226856    | 2.772   | 6.937 | 0.008441 | CSMD1   | LCE1E    |
| 1  | chr1_152759678  | 12 | chr12_6928026   | 0.4637  | 6.937 | 0.008442 | CD4     | LCE1E    |
| 5  | chr5_132046808  | 17 | chr17_73888354  | 0.1992  | 6.937 | 0.008442 | KIF3A   | TRIM65   |
| 3  | chr3_121646666  | 17 | chr17_78178189  | 4.503   | 6.937 | 0.008443 | CARD14  | SLC15A2  |
| 2  | chr2_61128196   | 2  | chr2_103040945  | 0.05744 | 6.937 | 0.008445 | IL18RAP | REL      |
| 2  | chr2_102984624  | 11 | chr11_64003792  | 7.313   | 6.936 | 0.008448 | IL18R1  | VEGFB    |
| 1  | chr1_67633930   | 1  | chr1_152759678  | 1.902   | 6.935 | 0.008452 | IL23R   | LCE1E    |
| 2  | chr2_61128200   | 16 | chr16_11009267  | 5.547   | 6.934 | 0.008455 | CIITA   | REL      |

|    |                 |    |                 |         |       |          |          |              |
|----|-----------------|----|-----------------|---------|-------|----------|----------|--------------|
| 1  | chr1_234565787  | 19 | chr19_10091356  | 0.1085  | 6.934 | 0.008457 | COL5A3   | TARBP1       |
| 5  | chr5_96121069   | 19 | chr19_10465304  | 3.533   | 6.934 | 0.008459 | ERAP1    | TYK2         |
| 1  | chr1_172633592  | 2  | chr2_103039873  | 2.849   | 6.933 | 0.008461 | FASLG    | IL18RAP      |
| 2  | chr2_102984671  | 19 | chr19_10102749  | 7.535   | 6.933 | 0.008462 | COL5A3   | IL18R1       |
| 2  | chr2_102998279  | 12 | chr12_6604632   | 0.1644  | 6.932 | 0.008467 | IL18R1   | NCAPD2       |
| 5  | chr5_150414516  | 19 | chr19_10104154  | 0.207   | 6.932 | 0.008468 | COL5A3   | TNIP1        |
| 10 | chr10_81058027  | 16 | chr16_30938811  | 0.841   | 6.931 | 0.008471 | FBXL19   | ZMIZ1        |
| 1  | chr1_159002222  | 2  | chr2_60689430   | 0.4086  | 6.93  | 0.008476 | BCL11A   | IFI16        |
| 1  | chr1_234573171  | 14 | chr14_35780154  | 0.1132  | 6.93  | 0.008476 | PSMA6    | TARBP1       |
| 5  | chr5_150566792  | 16 | chr16_11066958  | 2.495   | 6.928 | 0.008486 | CCDC69   | CLEC16A      |
| 2  | chr2_62728105   | 5  | chr5_79730041   | 0.3103  | 6.927 | 0.00849  | TMEM17   | ZFYVE16      |
| 17 | chr17_40481529  | 19 | chr19_49447806  | 0.3704  | 6.926 | 0.008494 | DHDH     | STAT3        |
| 2  | chr2_103125466  | 17 | chr17_40854650  | 2.975   | 6.926 | 0.008497 | EZH1     | SLC9A4       |
| 2  | chr2_103006387  | 17 | chr17_38153820  | 0.2803  | 6.925 | 0.0085   | IL18R1   | PSMD3        |
| 1  | chr1_67633930   | 5  | chr5_96124447   | 0.5174  | 6.924 | 0.008504 | ERAP1    | IL23R        |
| 2  | chr2_62728046   | 9  | chr9_32631110   | 0.2438  | 6.924 | 0.008507 | TAF1L    | TMEM17       |
| 1  | chr1_12249031   | 5  | chr5_131728338  | 4.472   | 6.923 | 0.008508 | SLC22A5  | TNFRSF1B     |
| 1  | chr1_8073466    | 17 | chr17_38063381  | 0.2761  | 6.923 | 0.008508 | ERRFI1   | GSDMB        |
| 11 | chr11_128350126 | 17 | chr17_38173143  | 0.3799  | 6.923 | 0.008508 | CSF3     | ETS1         |
| 5  | chr5_96222185   | 11 | chr11_9817519   | 4.451   | 6.923 | 0.00851  | ERAP2    | SBF2-AS1     |
| 2  | chr2_62728105   | 17 | chr17_78093192  | 2.859   | 6.923 | 0.008511 | GAA      | TMEM17       |
| 3  | chr3_121634179  | 17 | chr17_40459737  | 0.2267  | 6.922 | 0.008513 | SLC15A2  | STAT5A       |
| 1  | chr1_152732436  | 1  | chr1_206972442  | 0.5394  | 6.922 | 0.008514 | IL19     | KPRP         |
| 2  | chr2_103006448  | 4  | chr4_103531882  | 0.2086  | 6.922 | 0.008514 | IL18R1   | NFKB1        |
| 13 | chr13_40253646  | 17 | chr17_78171944  | 4.716   | 6.921 | 0.00852  | CARD14   | COG6         |
| 2  | chr2_103121779  | 5  | chr5_96222183   | 2.222   | 6.921 | 0.008521 | ERAP2    | SLC9A4       |
| 5  | chr5_96509055   | 11 | chr11_9879877   | 0.4117  | 6.92  | 0.008522 | RIOK2    | SBF2         |
| 5  | chr5_96232222   | 6  | chr6_138539306  | 2.226   | 6.919 | 0.008528 | ERAP2    | PBOV1        |
| 12 | chr12_6562768   | 20 | chr20_48466074  | 0.04802 | 6.916 | 0.008543 | SLC9A8   | TAPBPL       |
| 6  | chr6_138539204  | 12 | chr12_6604076   | 3.553   | 6.916 | 0.008543 | NCAPD2   | PBOV1        |
| 2  | chr2_103011237  | 18 | chr18_12978733  | 1.161   | 6.914 | 0.008551 | IL18R1   | SEH1L        |
| 5  | chr5_96509055   | 12 | chr12_111923245 | 2.023   | 6.914 | 0.008553 | ATXN2    | RIOK2        |
| 2  | chr2_102960007  | 6  | chr6_111922426  | 0.3861  | 6.914 | 0.008554 | IL1RL1   | TRAF3IP2-AS1 |
| 2  | chr2_102998279  | 3  | chr3_101446352  | 6.663   | 6.913 | 0.008556 | CEP97    | IL18R1       |
| 1  | chr1_152329369  | 19 | chr19_49656408  | 0.0558  | 6.913 | 0.008559 | FLG2     | HRC          |
| 2  | chr2_102968362  | 12 | chr12_111895253 | 0.3187  | 6.912 | 0.00856  | ATXN2    | IL1RL1       |
| 3  | chr3_121647656  | 10 | chr10_101934235 | 1.192   | 6.912 | 0.008563 | ERLIN1   | SLC15A2      |
| 10 | chr10_81056383  | 10 | chr10_102051052 | 8.98    | 6.911 | 0.008565 | PKD2L1   | ZMIZ1        |
| 17 | chr17_40481641  | 19 | chr19_10104154  | 2.369   | 6.911 | 0.008566 | COL5A3   | STAT3        |
| 10 | chr10_81060474  | 11 | chr11_63919999  | 5.067   | 6.911 | 0.008568 | MACROD1  | ZMIZ1        |
| 1  | chr1_67666705   | 1  | chr1_207078420  | 0.208   | 6.91  | 0.008571 | FCMR     | IL23R        |
| 3  | chr3_121647656  | 12 | chr12_56744010  | 0.4066  | 6.91  | 0.008573 | SLC15A2  | STAT2        |
| 12 | chr12_56531418  | 17 | chr17_78178182  | 0.2257  | 6.909 | 0.008577 | CARD14   | ESYT1        |
| 2  | chr2_103006448  | 17 | chr17_38063381  | 0.8834  | 6.908 | 0.008581 | GSDMB    | IL18R1       |
| 2  | chr2_163149965  | 12 | chr12_112479891 | 0.2743  | 6.908 | 0.008581 | IFIH1    | NAA25        |
| 4  | chr4_103534560  | 6  | chr6_111887624  | 1.901   | 6.908 | 0.008582 | NFKB1    | TRAF3IP2-AS1 |
| 12 | chr12_56384687  | 16 | chr16_31309217  | 8.103   | 6.907 | 0.008585 | ITGAM    | RAB5B        |
| 2  | chr2_102641201  | 4  | chr4_103488165  | 0.106   | 6.907 | 0.008586 | IL1R2    | NFKB1        |
| 12 | chr12_6861043   | 17 | chr17_38153712  | 0.512   | 6.907 | 0.008587 | MLF2     | PSMD3        |
| 2  | chr2_102955683  | 19 | chr19_49230183  | 7.455   | 6.906 | 0.008589 | IL1RL1   | RASIP1       |
| 12 | chr12_6161963   | 12 | chr12_6500105   | 5.256   | 6.906 | 0.008591 | LTBR     | VWF          |
| 5  | chr5_96139250   | 12 | chr12_6131085   | 0.3551  | 6.906 | 0.008591 | ERAP1    | VWF          |
| 1  | chr1_152770589  | 3  | chr3_169492034  | 0.4157  | 6.904 | 0.0086   | LCE1D    | MYNN         |
| 2  | chr2_163137695  | 11 | chr11_63920076  | 3.583   | 6.901 | 0.008614 | IFIH1    | MACROD1      |
| 1  | chr1_8073466    | 17 | chr17_38029120  | 0.2767  | 6.901 | 0.008617 | ERRFI1   | ZBP2         |
| 12 | chr12_56737245  | 16 | chr16_31095251  | 0.1917  | 6.9   | 0.00862  | PRSS53   | STAT2        |
| 12 | chr12_56531486  | 19 | chr19_10464687  | 0.2565  | 6.899 | 0.008622 | ESYT1    | TYK2         |
| 2  | chr2_102997884  | 6  | chr6_138628488  | 0.286   | 6.9   | 0.008622 | ARFGEF3  | IL18R1       |
| 16 | chr16_11016173  | 17 | chr17_78178830  | 4.805   | 6.899 | 0.008624 | CARD14   | CIITA        |
| 2  | chr2_103125466  | 4  | chr4_103635614  | 0.2443  | 6.899 | 0.008625 | MANBA    | SLC9A4       |
| 3  | chr3_169642633  | 12 | chr12_6619284   | 5.884   | 6.899 | 0.008626 | NCAPD2   | SAMD7        |
| 4  | chr4_103571832  | 18 | chr18_12978733  | 5.626   | 6.898 | 0.008629 | MANBA    | SEH1L        |
| 5  | chr5_96121069   | 5  | chr5_96512894   | 0.2769  | 6.897 | 0.008632 | ERAP1    | RIOK2        |
| 14 | chr14_36147186  | 16 | chr16_11444716  | 4.848   | 6.896 | 0.008637 | RALGAPA1 | RMI2         |

|    |                |    |                 |         |       |          |         |              |
|----|----------------|----|-----------------|---------|-------|----------|---------|--------------|
| 5  | chr5_96121183  | 13 | chr13_40273655  | 6.761   | 6.896 | 0.008638 | COG6    | ERAP1        |
| 2  | chr2_102998279 | 4  | chr4_103531882  | 0.2093  | 6.896 | 0.008639 | IL18R1  | NFKB1        |
| 5  | chr5_150415299 | 6  | chr6_138192761  | 9.198   | 6.895 | 0.008643 | TNFAIP3 | TNIP1        |
| 2  | chr2_62450631  | 14 | chr14_64548124  | 3.973   | 6.895 | 0.008644 | B3GNT2  | MIR548AZ     |
| 16 | chr16_11444716 | 16 | chr16_31429580  | 2.206   | 6.894 | 0.008647 | ITGAD   | RM12         |
| 2  | chr2_103006448 | 12 | chr12_6637054   | 0.1523  | 6.894 | 0.00865  | IL18R1  | NCAPD2       |
| 1  | chr1_158990412 | 5  | chr5_131825142  | 2.135   | 6.893 | 0.008651 | IFI16   | IRF1         |
| 11 | chr11_64543820 | 16 | chr16_31122571  | 0.2817  | 6.892 | 0.008656 | BCKDK   | SF1          |
| 4  | chr4_103557219 | 19 | chr19_10096595  | 0.2397  | 6.892 | 0.008658 | COL5A3  | MANBA        |
| 1  | chr1_207010261 | 17 | chr17_38153554  | 0.1864  | 6.892 | 0.008659 | IL19    | PSMD3        |
| 14 | chr14_35782244 | 19 | chr19_10472933  | 0.3759  | 6.892 | 0.00866  | PSMA6   | TYK2         |
| 6  | chr6_491316    | 17 | chr17_78180618  | 2.467   | 6.891 | 0.008664 | CARD14  | EXOC2        |
| 1  | chr1_158990274 | 17 | chr17_38029120  | 0.1668  | 6.89  | 0.008666 | IFI16   | ZBPB2        |
| 2  | chr2_102968007 | 12 | chr12_111894968 | 0.2209  | 6.89  | 0.008666 | ATXN2   | IL1RL1       |
| 5  | chr5_150496853 | 16 | chr16_30938811  | 1.374   | 6.89  | 0.008666 | ANXA6   | FBXL19       |
| 5  | chr5_150704781 | 17 | chr17_38153473  | 0.4744  | 6.89  | 0.008668 | PSMD3   | SLC36A2      |
| 5  | chr5_150566792 | 16 | chr16_31485786  | 2.922   | 6.889 | 0.008671 | CCDC69  | TGFB1I1      |
| 2  | chr2_103039873 | 10 | chr10_89472846  | 12.25   | 6.888 | 0.008678 | IL18RAP | PAPSS2       |
| 17 | chr17_38073414 | 17 | chr17_78178189  | 2.505   | 6.888 | 0.008679 | CARD14  | GSDMB        |
| 2  | chr2_102967928 | 3  | chr3_101576136  | 0.3617  | 6.888 | 0.00868  | IL1RL1  | NFKBIZ       |
| 1  | chr1_158987941 | 5  | chr5_132034799  | 4.511   | 6.887 | 0.008684 | IFI16   | KIF3A        |
| 5  | chr5_96124296  | 17 | chr17_40476847  | 0.06612 | 6.887 | 0.008685 | ERAP1   | STAT3        |
| 1  | chr1_206942085 | 12 | chr12_6861043   | 2.864   | 6.886 | 0.008687 | IL10    | MLF2         |
| 2  | chr2_102955683 | 6  | chr6_111922426  | 0.3942  | 6.886 | 0.008687 | IL1RL1  | TRAF3IP2-AS1 |
| 2  | chr2_102968007 | 8  | chr8_3205697    | 0.2795  | 6.885 | 0.00869  | CSMD1   | IL1RL1       |
| 16 | chr16_31421719 | 17 | chr17_78178189  | 0.1489  | 6.885 | 0.008692 | CARD14  | ITGAD        |
| 1  | chr1_207009910 | 19 | chr19_49119796  | 4.057   | 6.885 | 0.008693 | IL19    | RPL18        |
| 5  | chr5_96252998  | 19 | chr19_10090574  | 0.1509  | 6.885 | 0.008694 | COL5A3  | ERAP2        |
| 2  | chr2_62728046  | 19 | chr19_10248318  | 4.988   | 6.883 | 0.008701 | DNMT1   | TMEM17       |
| 1  | chr1_158990274 | 17 | chr17_38024626  | 0.167   | 6.882 | 0.008707 | IFI16   | ZBPB2        |
| 11 | chr11_9983631  | 17 | chr17_40459737  | 0.4572  | 6.882 | 0.008707 | SBF2    | STAT5A       |
| 19 | chr19_49540013 | 21 | chr21_34954851  | 5.863   | 6.882 | 0.008707 | CGB1    | DONSON       |
| 1  | chr1_12254900  | 2  | chr2_103006387  | 2.86    | 6.881 | 0.008712 | IL18R1  | TNFRSF1B     |
| 1  | chr1_234563556 | 12 | chr12_56336054  | 2.789   | 6.881 | 0.008713 | DGKA    | TARBP1       |
| 1  | chr1_158986225 | 3  | chr3_121810654  | 0.4053  | 6.879 | 0.008719 | CD86    | IFI16        |
| 1  | chr1_234584446 | 5  | chr5_150411872  | 0.2902  | 6.879 | 0.008723 | TARBP1  | TNIP1        |
| 17 | chr17_73759653 | 19 | chr19_10464687  | 0.2745  | 6.879 | 0.008724 | GALK1   | TYK2         |
| 2  | chr2_103125466 | 12 | chr12_112471183 | 0.3504  | 6.878 | 0.008728 | NAA25   | SLC9A4       |
| 18 | chr18_12978733 | 20 | chr20_48562549  | 7.421   | 6.877 | 0.008731 | RNF114  | SEH1L        |
| 1  | chr1_8073672   | 1  | chr1_158990412  | 0.2073  | 6.877 | 0.008732 | ERRF1   | IFI16        |
| 3  | chr3_121646666 | 17 | chr17_78178182  | 4.281   | 6.877 | 0.008732 | CARD14  | SLC15A2      |
| 4  | chr4_103571726 | 5  | chr5_96125910   | 0.1175  | 6.877 | 0.008733 | ERAP1   | MANBA        |
| 2  | chr2_103006448 | 21 | chr21_34805286  | 0.1236  | 6.876 | 0.008736 | IFNGR2  | IL18R1       |
| 1  | chr1_159002778 | 1  | chr1_234608381  | 0.731   | 6.876 | 0.008737 | IFI16   | TARBP1       |
| 2  | chr2_103090127 | 12 | chr12_6635411   | 0.3891  | 6.876 | 0.008737 | NCAPD2  | SLC9A4       |
| 1  | chr1_158986477 | 5  | chr5_150497409  | 0.2214  | 6.875 | 0.008739 | ANXA6   | IFI16        |
| 1  | chr1_11732033  | 20 | chr20_48599549  | 0.5106  | 6.873 | 0.008748 | FBXO6   | SNAI1        |
| 5  | chr5_96509055  | 11 | chr11_9838475   | 0.4835  | 6.874 | 0.008748 | RIOK2   | SBF2         |
| 2  | chr2_102641201 | 4  | chr4_103504011  | 2.949   | 6.873 | 0.008751 | IL1R2   | NFKB1        |
| 2  | chr2_103011237 | 17 | chr17_40717855  | 0.2828  | 6.873 | 0.008753 | COASY   | IL18R1       |
| 5  | chr5_150443005 | 19 | chr19_10100192  | 3.924   | 6.872 | 0.008757 | COL5A3  | TNIP1        |
| 11 | chr11_65373194 | 20 | chr20_48599549  | 5.248   | 6.871 | 0.00876  | MAP3K11 | SNAI1        |
| 2  | chr2_103011237 | 10 | chr10_75143440  | 7.415   | 6.871 | 0.008762 | ANXA7   | IL18R1       |
| 14 | chr14_35778161 | 19 | chr19_10114033  | 0.1965  | 6.87  | 0.008768 | COL5A3  | PSMA6        |
| 2  | chr2_163136727 | 17 | chr17_40716235  | 1.134   | 6.869 | 0.00877  | COASY   | IFIH1        |
| 12 | chr12_6562768  | 17 | chr17_40717317  | 0.1721  | 6.869 | 0.008771 | COASY   | TAPBP1       |
| 14 | chr14_35761675 | 16 | chr16_10998482  | 0.8969  | 6.869 | 0.008772 | CIITA   | PSMA6        |
| 14 | chr14_35761675 | 19 | chr19_49119894  | 0.742   | 6.868 | 0.008774 | PSMA6   | RPL18        |
| 5  | chr5_96121069  | 20 | chr20_48558119  | 0.2135  | 6.867 | 0.008778 | ERAP1   | RNF114       |
| 17 | chr17_26116743 | 17 | chr17_38063381  | 0.4016  | 6.867 | 0.008779 | GSDMB   | NOS2         |
| 1  | chr1_152286357 | 2  | chr2_163149896  | 0.1361  | 6.867 | 0.008783 | FLG     | IFIH1        |
| 2  | chr2_61181222  | 11 | chr11_65601560  | 9.436   | 6.865 | 0.00879  | PUS10   | SNX32        |
| 2  | chr2_62728046  | 19 | chr19_10264986  | 0.166   | 6.863 | 0.008802 | DNMT1   | TMEM17       |
| 2  | chr2_61190024  | 17 | chr17_40481529  | 4.857   | 6.862 | 0.008804 | PUS10   | STAT3        |

|    |                |    |                 |        |       |          |          |          |
|----|----------------|----|-----------------|--------|-------|----------|----------|----------|
| 5  | chr5_150443005 | 16 | chr16_11016073  | 5.633  | 6.862 | 0.008804 | CIITA    | TNIP1    |
| 4  | chr4_103537442 | 5  | chr5_131811613  | 2.219  | 6.861 | 0.00881  | C5orf56  | NFKB1    |
| 1  | chr1_67666600  | 12 | chr12_6500105   | 7.92   | 6.86  | 0.008815 | IL23R    | LTBR     |
| 2  | chr2_102967928 | 8  | chr8_3205697    | 0.2821 | 6.86  | 0.008815 | CSMD1    | IL1RL1   |
| 17 | chr17_40476822 | 20 | chr20_48522585  | 4.316  | 6.86  | 0.008816 | SPATA2   | STAT3    |
| 1  | chr1_159002222 | 6  | chr6_111913219  | 0.3743 | 6.858 | 0.008826 | IFI16    | TRAF3IP2 |
| 1  | chr1_234584446 | 10 | chr10_81058144  | 3.199  | 6.857 | 0.008829 | TARBP1   | ZMIZ1    |
| 12 | chr12_56528084 | 17 | chr17_78178182  | 0.2043 | 6.857 | 0.00883  | CARD14   | ESYT1    |
| 1  | chr1_159002510 | 12 | chr12_56744422  | 0.1755 | 6.856 | 0.008832 | IFI16    | STAT2    |
| 12 | chr12_56744988 | 17 | chr17_40716235  | 0.2531 | 6.857 | 0.008832 | COASY    | STAT2    |
| 1  | chr1_67648596  | 2  | chr2_103039887  | 20.97  | 6.855 | 0.008841 | IL18RAP  | IL23R    |
| 2  | chr2_62733253  | 12 | chr12_122750974 | 3.394  | 6.854 | 0.008842 | TMEM17   | VPS33A   |
| 1  | chr1_152329369 | 11 | chr11_65793700  | 0.1631 | 6.854 | 0.008843 | CATSPER1 | FLG2     |
| 5  | chr5_131722766 | 19 | chr19_10472933  | 4.845  | 6.854 | 0.008843 | SLC22A5  | TYK2     |
| 5  | chr5_79745499  | 19 | chr19_10085062  | 3.051  | 6.853 | 0.008851 | COL5A3   | ZFYVE16  |
| 2  | chr2_102967928 | 17 | chr17_38173143  | 0.8923 | 6.852 | 0.008853 | CSF3     | IL1RL1   |
| 5  | chr5_96252998  | 16 | chr16_31424290  | 2.285  | 6.852 | 0.008853 | ERAP2    | ITGAD    |
| 5  | chr5_132034799 | 5  | chr5_150566792  | 0.2547 | 6.852 | 0.008854 | CCDC69   | KIF3A    |
| 12 | chr12_56510705 | 17 | chr17_38024626  | 3.601  | 6.85  | 0.008862 | RPL41    | ZBPB2    |
| 12 | chr12_6604076  | 19 | chr19_49422412  | 3.022  | 6.85  | 0.008863 | NCAPD2   | NUCB1    |
| 1  | chr1_152329369 | 2  | chr2_61145746   | 4.309  | 6.85  | 0.008866 | FLG2     | REL      |
| 2  | chr2_102997884 | 5  | chr5_79768604   | 0.2737 | 6.849 | 0.00887  | IL18R1   | ZFYVE16  |
| 2  | chr2_103149248 | 12 | chr12_6636392   | 10.03  | 6.849 | 0.00887  | NCAPD2   | SLC9A4   |
| 2  | chr2_162875478 | 17 | chr17_38173143  | 2.222  | 6.849 | 0.008871 | CSF3     | DPP4     |
| 4  | chr4_103585987 | 17 | chr17_26116896  | 0.1454 | 6.844 | 0.008895 | MANBA    | NOS2     |
| 4  | chr4_103534560 | 17 | chr17_78093367  | 0.5085 | 6.844 | 0.008896 | GAA      | NFKB1    |
| 16 | chr16_31405462 | 19 | chr19_10475652  | 0.1594 | 6.843 | 0.008899 | ITGAD    | TYK2     |
| 1  | chr1_206944791 | 5  | chr5_96121994   | 0.172  | 6.843 | 0.008901 | ERAP1    | IL10     |
| 1  | chr1_158990412 | 7  | chr7_37298982   | 0.3371 | 6.841 | 0.00891  | ELMO1    | IFI16    |
| 5  | chr5_96509055  | 16 | chr16_11154878  | 0.2356 | 6.841 | 0.00891  | CLEC16A  | RIOK2    |
| 5  | chr5_96121183  | 17 | chr17_40497728  | 9.957  | 6.84  | 0.008915 | ERAP1    | STAT3    |
| 5  | chr5_96339273  | 19 | chr19_10460737  | 0.1382 | 6.838 | 0.008922 | LNPEP    | TYK2     |
| 5  | chr5_96252998  | 16 | chr16_31196070  | 0.2853 | 6.838 | 0.008924 | ERAP2    | FUS      |
| 5  | chr5_96124447  | 5  | chr5_150282783  | 0.2012 | 6.838 | 0.008925 | ERAP1    | ZNF300   |
| 2  | chr2_163137871 | 11 | chr11_63920076  | 3.562  | 6.836 | 0.008933 | IFIH1    | MACROD1  |
| 2  | chr2_62728105  | 17 | chr17_73723374  | 3.667  | 6.836 | 0.008936 | ITGB4    | TMEM17   |
| 1  | chr1_207110488 | 5  | chr5_96513471   | 5.703  | 6.835 | 0.008937 | PIGR     | RIOK2    |
| 3  | chr3_101451586 | 4  | chr4_103534560  | 0.3282 | 6.835 | 0.008938 | CEP97    | NFKB1    |
| 2  | chr2_163137683 | 3  | chr3_101576397  | 11.23  | 6.835 | 0.008941 | IFIH1    | NFKBIZ   |
| 4  | chr4_103534560 | 12 | chr12_6483662   | 4.233  | 6.834 | 0.008942 | NFKB1    | SCNN1A   |
| 2  | chr2_103125466 | 19 | chr19_49230183  | 7.602  | 6.834 | 0.008943 | RASIP1   | SLC9A4   |
| 5  | chr5_150496853 | 11 | chr11_64543820  | 2.88   | 6.834 | 0.008943 | ANXA6    | SF1      |
| 1  | chr1_8422806   | 17 | chr17_38173143  | 3.368  | 6.834 | 0.008945 | CSF3     | RERE     |
| 1  | chr1_152732251 | 14 | chr14_35596323  | 16.72  | 6.834 | 0.008946 | KIAA0391 | KPRP     |
| 14 | chr14_35871014 | 19 | chr19_10104154  | 0.1752 | 6.833 | 0.008949 | COL5A3   | NFKBIA   |
| 4  | chr4_103553090 | 12 | chr12_6131010   | 0.3519 | 6.833 | 0.008949 | MANBA    | VWF      |
| 11 | chr11_66083256 | 12 | chr12_56384687  | 3.754  | 6.832 | 0.008952 | CD248    | RAB5B    |
| 2  | chr2_103006448 | 2  | chr2_103136485  | 2.946  | 6.831 | 0.008956 | IL18R1   | SLC9A4   |
| 3  | chr3_121810428 | 5  | chr5_96124447   | 2.373  | 6.831 | 0.008959 | CD86     | ERAP1    |
| 1  | chr1_152732436 | 4  | chr4_103537729  | 0.2021 | 6.831 | 0.008961 | KPRP     | NFKB1    |
| 2  | chr2_102984671 | 5  | chr5_79374767   | 3.986  | 6.83  | 0.008963 | IL18R1   | THBS4    |
| 5  | chr5_96139250  | 17 | chr17_78175799  | 0.1392 | 6.83  | 0.008963 | CARD14   | ERAP1    |
| 1  | chr1_159002778 | 12 | chr12_56398626  | 1.928  | 6.829 | 0.00897  | IFI16    | SUOX     |
| 2  | chr2_102984624 | 4  | chr4_103635674  | 0.1879 | 6.829 | 0.00897  | IL18R1   | MANBA    |
| 12 | chr12_56740266 | 19 | chr19_10114033  | 2.08   | 6.828 | 0.008972 | COL5A3   | STAT2    |
| 10 | chr10_81060474 | 17 | chr17_38153833  | 0.1854 | 6.827 | 0.008977 | PSMD3    | ZMIZ1    |
| 2  | chr2_103125466 | 12 | chr12_6636116   | 0.4047 | 6.827 | 0.008979 | NCAPD2   | SLC9A4   |
| 1  | chr1_234565787 | 5  | chr5_131728231  | 0.2584 | 6.827 | 0.00898  | SLC22A5  | TARBP1   |
| 1  | chr1_67648596  | 16 | chr16_31332628  | 17.39  | 6.826 | 0.008983 | IL23R    | ITGAM    |
| 1  | chr1_8424744   | 5  | chr5_96249323   | 2.871  | 6.826 | 0.008983 | ERAP2    | RERE     |
| 1  | chr1_206945718 | 5  | chr5_150566792  | 0.3539 | 6.826 | 0.008984 | CCDC69   | IL10     |
| 5  | chr5_96121994  | 5  | chr5_150282783  | 0.225  | 6.826 | 0.008984 | ERAP1    | ZNF300   |
| 5  | chr5_150566792 | 19 | chr19_10081260  | 3.088  | 6.826 | 0.008986 | CCDC69   | COL5A3   |
| 1  | chr1_207009910 | 17 | chr17_78172455  | 3.839  | 6.825 | 0.008987 | CARD14   | IL19     |

|    |                |    |                 |        |       |          |          |         |
|----|----------------|----|-----------------|--------|-------|----------|----------|---------|
| 1  | chr1_234563154 | 2  | chr2_102997884  | 5.319  | 6.824 | 0.008992 | IL18R1   | TARBP1  |
| 11 | chr11_9850990  | 13 | chr13_20763612  | 8.392  | 6.824 | 0.008993 | GJB2     | SBF2    |
| 2  | chr2_62450631  | 2  | chr2_103059664  | 2.446  | 6.824 | 0.008996 | B3GNT2   | IL18RAP |
| 16 | chr16_11051673 | 17 | chr17_78180618  | 0.2187 | 6.823 | 0.008997 | CARD14   | CLEC16A |
| 5  | chr5_96252998  | 17 | chr17_25639188  | 2.467  | 6.823 | 0.008997 | ERAP2    | WSB1    |
| 17 | chr17_78179012 | 19 | chr19_10475652  | 3.554  | 6.823 | 0.009001 | CARD14   | TYK2    |
| 2  | chr2_163136771 | 3  | chr3_101576397  | 11.21  | 6.822 | 0.009002 | IFIH1    | NFKBIZ  |
| 2  | chr2_102984671 | 5  | chr5_150497409  | 0.2051 | 6.82  | 0.009013 | ANXA6    | IL18R1  |
| 4  | chr4_103514445 | 19 | chr19_10090684  | 2.457  | 6.82  | 0.009017 | COL5A3   | NFKB1   |
| 5  | chr5_96129512  | 9  | chr9_32631356   | 3.334  | 6.819 | 0.009018 | ERAP1    | TAF1L   |
| 4  | chr4_103514445 | 6  | chr6_395246     | 2.064  | 6.819 | 0.009022 | IRF4     | NFKB1   |
| 5  | chr5_96139250  | 17 | chr17_26105797  | 3.519  | 6.818 | 0.009025 | ERAP1    | NOS2    |
| 10 | chr10_81058027 | 17 | chr17_38153833  | 0.1691 | 6.818 | 0.009026 | PSMD3    | ZMZ1    |
| 5  | chr5_150566792 | 19 | chr19_49540013  | 2.355  | 6.817 | 0.009027 | CCDC69   | CGB1    |
| 1  | chr1_67786218  | 17 | chr17_26116896  | 7.003  | 6.817 | 0.009031 | IL12RB2  | NOS2    |
| 1  | chr1_152329369 | 11 | chr11_65601670  | 6.856  | 6.816 | 0.009034 | FLG2     | SNX32   |
| 2  | chr2_103039873 | 19 | chr19_49671451  | 2.97   | 6.816 | 0.009036 | IL18RAP  | TRPM4   |
| 1  | chr1_7997619   | 5  | chr5_96339273   | 0.5559 | 6.814 | 0.009043 | LNPEP    | TNFRSF9 |
| 1  | chr1_207014445 | 2  | chr2_103090127  | 4.515  | 6.814 | 0.009046 | IL19     | SLC9A4  |
| 1  | chr1_234607086 | 17 | chr17_78093367  | 0.3629 | 6.814 | 0.009046 | GAA      | TARBP1  |
| 2  | chr2_103040182 | 2  | chr2_103090127  | 1.203  | 6.813 | 0.009052 | IL18RAP  | SLC9A4  |
| 1  | chr1_78024514  | 5  | chr5_96117300   | 3.624  | 6.812 | 0.009055 | AK5      | ERAP1   |
| 2  | chr2_103090127 | 17 | chr17_40854650  | 2.611  | 6.811 | 0.009062 | EZH1     | SLC9A4  |
| 17 | chr17_73515172 | 17 | chr17_78178170  | 2.341  | 6.81  | 0.009065 | CARD14   | TSEN54  |
| 2  | chr2_102644675 | 5  | chr5_96125910   | 2.954  | 6.809 | 0.00907  | ERAP1    | IL1R2   |
| 2  | chr2_163137695 | 3  | chr3_101576397  | 11.18  | 6.807 | 0.009078 | IFIH1    | NFKBIZ  |
| 1  | chr1_152681689 | 12 | chr12_6464809   | 0.6285 | 6.807 | 0.009082 | LCE4A    | SCNN1A  |
| 1  | chr1_152759678 | 12 | chr12_56745105  | 0.2915 | 6.806 | 0.009083 | LCE1E    | STAT2   |
| 2  | chr2_102998279 | 10 | chr10_75143440  | 7.345  | 6.806 | 0.009084 | ANXA7    | IL18R1  |
| 8  | chr8_3351163   | 17 | chr17_78166385  | 19.6   | 6.806 | 0.009085 | CARD14   | CSMD1   |
| 5  | chr5_96121069  | 5  | chr5_150282783  | 0.1692 | 6.806 | 0.009087 | ERAP1    | ZNF300  |
| 5  | chr5_150443005 | 20 | chr20_48562097  | 2.562  | 6.805 | 0.009092 | RNF114   | TNIP1   |
| 12 | chr12_56384687 | 19 | chr19_10464687  | 1.096  | 6.804 | 0.009094 | RAB5B    | TYK2    |
| 5  | chr5_96339273  | 5  | chr5_131726375  | 18.22  | 6.804 | 0.009094 | LNPEP    | SLC22A5 |
| 2  | chr2_102955683 | 17 | chr17_38153820  | 0.2778 | 6.804 | 0.009098 | IL1RL1   | PSMD3   |
| 2  | chr2_163134756 | 5  | chr5_96121069   | 4.454  | 6.803 | 0.009098 | ERAP1    | IFIH1   |
| 4  | chr4_103534560 | 10 | chr10_81060474  | 1.093  | 6.804 | 0.009098 | NFKB1    | ZMZ1    |
| 13 | chr13_99966536 | 16 | chr16_31095204  | 2.775  | 6.802 | 0.009107 | MIR548AN | PRSS53  |
| 2  | chr2_60689430  | 19 | chr19_10108850  | 0.3275 | 6.801 | 0.009112 | BCL11A   | COL5A3  |
| 2  | chr2_103040945 | 5  | chr5_96508933   | 0.1138 | 6.8   | 0.009114 | IL18RAP  | RIOK2   |
| 4  | chr4_103557219 | 10 | chr10_101643911 | 0.1895 | 6.8   | 0.009115 | DNMBP    | MANBA   |
| 1  | chr1_158986477 | 3  | chr3_101571838  | 0.1546 | 6.8   | 0.009117 | IFI16    | NFKBIZ  |
| 1  | chr1_234565787 | 2  | chr2_61239020   | 2.28   | 6.8   | 0.009118 | PUS10    | TARBP1  |
| 2  | chr2_103040945 | 5  | chr5_150497409  | 0.1952 | 6.799 | 0.009121 | ANXA6    | IL18RAP |
| 1  | chr1_67852347  | 17 | chr17_40716235  | 0.2133 | 6.799 | 0.009123 | COASY    | IL12RB2 |
| 1  | chr1_234607104 | 19 | chr19_10108850  | 1.206  | 6.797 | 0.00913  | COL5A3   | TARBP1  |
| 2  | chr2_163144850 | 11 | chr11_65601560  | 2.921  | 6.796 | 0.009135 | IFIH1    | SNX32   |
| 12 | chr12_56744988 | 17 | chr17_73888354  | 5.742  | 6.796 | 0.009136 | STAT2    | TRIM65  |
| 5  | chr5_132051607 | 17 | chr17_38153554  | 4.32   | 6.794 | 0.009146 | KIF3A    | PSMD3   |
| 1  | chr1_159002222 | 19 | chr19_53453278  | 0.3643 | 6.793 | 0.009152 | IFI16    | ZNF816  |
| 12 | chr12_56362011 | 17 | chr17_40459737  | 2.828  | 6.793 | 0.009153 | CDK2     | STAT5A  |
| 10 | chr10_81056383 | 12 | chr12_111992212 | 4.658  | 6.792 | 0.009158 | ATXN2    | ZMZ1    |
| 2  | chr2_102967928 | 18 | chr18_12979041  | 1.164  | 6.792 | 0.009159 | IL1RL1   | SEH1L   |
| 2  | chr2_102968362 | 16 | chr16_11051783  | 4.624  | 6.79  | 0.009167 | CLEC16A  | IL1RL1  |
| 2  | chr2_102984624 | 17 | chr17_38024626  | 0.8855 | 6.788 | 0.009176 | IL18R1   | ZBP2    |
| 16 | chr16_31422521 | 17 | chr17_38024626  | 4.513  | 6.787 | 0.00918  | ITGAD    | ZBP2    |
| 2  | chr2_103130373 | 12 | chr12_56437315  | 0.0641 | 6.785 | 0.009195 | RPS26    | SLC9A4  |
| 2  | chr2_103090127 | 14 | chr14_35761791  | 0.2752 | 6.784 | 0.009196 | PSMA6    | SLC9A4  |
| 1  | chr1_159002222 | 12 | chr12_122720095 | 1.426  | 6.784 | 0.009197 | IFI16    | VPS33A  |
| 4  | chr4_103594938 | 5  | chr5_132037895  | 3.896  | 6.784 | 0.009199 | KIF3A    | MANBA   |
| 12 | chr12_56477560 | 17 | chr17_40481529  | 3.886  | 6.783 | 0.009201 | ERBB3    | STAT3   |
| 5  | chr5_150443005 | 19 | chr19_53453585  | 0.3736 | 6.783 | 0.009201 | TNIP1    | ZNF816  |
| 1  | chr1_7879545   | 21 | chr21_34954851  | 6.831  | 6.782 | 0.009206 | DONSON   | PER3    |
| 2  | chr2_163149965 | 11 | chr11_63920076  | 4.149  | 6.782 | 0.009207 | IFIH1    | MACROD1 |

|    |                 |    |                 |         |       |          |         |          |
|----|-----------------|----|-----------------|---------|-------|----------|---------|----------|
| 2  | chr2_62450631   | 11 | chr11_63974506  | 0.1656  | 6.782 | 0.00921  | B3GNT2  | FERMT3   |
| 16 | chr16_11004034  | 17 | chr17_73871467  | 3.564   | 6.781 | 0.009212 | CIITA   | TRIM47   |
| 1  | chr1_26688533   | 12 | chr12_6626369   | 0.2525  | 6.781 | 0.009215 | NCAPD2  | ZNF683   |
| 2  | chr2_103040177  | 4  | chr4_103531882  | 0.212   | 6.78  | 0.009217 | IL18RAP | NFKB1    |
| 3  | chr3_121642101  | 4  | chr4_103514445  | 3.094   | 6.78  | 0.00922  | NFKB1   | SLC15A2  |
| 2  | chr2_102984671  | 19 | chr19_10084473  | 2.378   | 6.78  | 0.009221 | COL5A3  | IL18R1   |
| 5  | chr5_96121069   | 9  | chr9_32631426   | 5.798   | 6.779 | 0.009223 | ERAP1   | TAF1L    |
| 1  | chr1_234563154  | 2  | chr2_103011237  | 4.058   | 6.777 | 0.009232 | IL18R1  | TARBP1   |
| 5  | chr5_96118852   | 12 | chr12_6623677   | 0.4704  | 6.777 | 0.009234 | ERAP1   | NCAPD2   |
| 5  | chr5_96228131   | 5  | chr5_158750013  | 5.476   | 6.777 | 0.009234 | ERAP2   | IL12B    |
| 5  | chr5_150581233  | 5  | chr5_158705065  | 0.3119  | 6.777 | 0.009235 | CCDC69  | UBLCP1   |
| 2  | chr2_62728105   | 3  | chr3_121810428  | 2.636   | 6.776 | 0.009241 | CD86    | TMEM17   |
| 5  | chr5_158747359  | 17 | chr17_78178170  | 2.819   | 6.776 | 0.009241 | CARD14  | IL12B    |
| 5  | chr5_96513471   | 21 | chr21_34876817  | 2.531   | 6.776 | 0.009241 | GART    | RIOK2    |
| 5  | chr5_96139435   | 17 | chr17_78166385  | 5.483   | 6.775 | 0.009242 | CARD14  | ERAP1    |
| 2  | chr2_103006387  | 2  | chr2_103040182  | 1.205   | 6.774 | 0.009248 | IL18R1  | IL18RAP  |
| 2  | chr2_163230194  | 19 | chr19_10108850  | 0.3023  | 6.774 | 0.00925  | COL5A3  | KCNH7    |
| 2  | chr2_102984671  | 5  | chr5_158705519  | 1.329   | 6.773 | 0.009256 | IL18R1  | UBLCP1   |
| 5  | chr5_96124447   | 12 | chr12_122354257 | 3.12    | 6.772 | 0.009259 | ERAP1   | PSMD9    |
| 2  | chr2_103006448  | 21 | chr21_35175117  | 0.2299  | 6.772 | 0.009262 | IL18R1  | ITSN1    |
| 2  | chr2_102957348  | 3  | chr3_169500454  | 3.094   | 6.771 | 0.009263 | IL1RL1  | MYNN     |
| 17 | chr17_38063381  | 19 | chr19_10096742  | 1.762   | 6.771 | 0.009267 | COL5A3  | GSDMB    |
| 2  | chr2_102998279  | 2  | chr2_103136485  | 2.945   | 6.77  | 0.009271 | IL18R1  | SLC9A4   |
| 2  | chr2_102984671  | 6  | chr6_138638331  | 0.3194  | 6.769 | 0.009274 | ARFGEF3 | IL18R1   |
| 12 | chr12_6636392   | 20 | chr20_48565700  | 0.2345  | 6.768 | 0.009279 | NCAPD2  | RNF114   |
| 5  | chr5_96117300   | 18 | chr18_61465672  | 2.638   | 6.767 | 0.009285 | ERAP1   | SERPINB7 |
| 1  | chr1_152770589  | 1  | chr1_158549549  | 6.477   | 6.766 | 0.009292 | LCE1D   | OR10X1   |
| 5  | chr5_79747477   | 12 | chr12_111895203 | 0.06009 | 6.765 | 0.009296 | ATXN2   | ZFYVE16  |
| 5  | chr5_96124447   | 19 | chr19_49422231  | 3.239   | 6.765 | 0.009298 | ERAP1   | NUCB1    |
| 5  | chr5_96129512   | 12 | chr12_10251227  | 0.3666  | 6.765 | 0.009298 | CLEC1A  | ERAP1    |
| 1  | chr1_67889571   | 19 | chr19_10084481  | 3.379   | 6.764 | 0.009301 | COL5A3  | SERBP1   |
| 1  | chr1_234607086  | 11 | chr11_128360376 | 6.757   | 6.763 | 0.009305 | ETS1    | TARBP1   |
| 2  | chr2_103130373  | 17 | chr17_77753128  | 18.66   | 6.763 | 0.009306 | CBX2    | SLC9A4   |
| 2  | chr2_163137871  | 3  | chr3_101576397  | 11.09   | 6.762 | 0.009312 | IFIH1   | NFKBIZ   |
| 2  | chr2_103006448  | 5  | chr5_132036004  | 0.2709  | 6.762 | 0.009313 | IL18R1  | KIF3A    |
| 2  | chr2_103040182  | 12 | chr12_6604632   | 0.106   | 6.762 | 0.009313 | IL18RAP | NCAPD2   |
| 17 | chr17_38031714  | 19 | chr19_10421207  | 3.233   | 6.762 | 0.009315 | FDX1L   | ZBP2     |
| 2  | chr2_62728105   | 5  | chr5_150498915  | 0.2501  | 6.761 | 0.009317 | ANXA6   | TMEM17   |
| 4  | chr4_103518813  | 12 | chr12_56384687  | 2.443   | 6.76  | 0.009322 | NFKB1   | RAB5B    |
| 2  | chr2_102957348  | 10 | chr10_81056383  | 0.7804  | 6.76  | 0.009323 | IL1RL1  | ZMZ1     |
| 5  | chr5_150439848  | 10 | chr10_81058027  | 0.3815  | 6.76  | 0.009325 | TNIP1   | ZMZ1     |
| 1  | chr1_158987941  | 6  | chr6_111913219  | 0.4185  | 6.758 | 0.00933  | IFI16   | TRAF3IP2 |
| 1  | chr1_152732311  | 2  | chr2_62728046   | 4.733   | 6.757 | 0.009336 | KPRP    | TMEM17   |
| 2  | chr2_103040177  | 17 | chr17_26125911  | 0.1073  | 6.757 | 0.009338 | IL18RAP | NOS2     |
| 1  | chr1_207015917  | 12 | chr12_6604076   | 1.866   | 6.757 | 0.009339 | IL19    | NCAPD2   |
| 4  | chr4_103594918  | 5  | chr5_96219520   | 0.3329  | 6.756 | 0.009341 | ERAP2   | MANBA    |
| 16 | chr16_31372344  | 18 | chr18_12979041  | 5.939   | 6.756 | 0.009342 | ITGAX   | SEH1L    |
| 5  | chr5_150510750  | 17 | chr17_78178182  | 6.621   | 6.756 | 0.009343 | ANXA6   | CARD14   |
| 10 | chr10_90034899  | 19 | chr19_10106896  | 4.888   | 6.756 | 0.009345 | COL5A3  | RNLS     |
| 10 | chr10_101643750 | 20 | chr20_48522585  | 0.4084  | 6.756 | 0.009346 | DNMBP   | SPATA2   |
| 4  | chr4_103594918  | 5  | chr5_132037895  | 3.885   | 6.755 | 0.009347 | KIF3A   | MANBA    |
| 5  | chr5_96119556   | 17 | chr17_38024626  | 16.37   | 6.755 | 0.009349 | ERAP1   | ZBP2     |
| 2  | chr2_103040177  | 18 | chr18_12978823  | 4.767   | 6.754 | 0.009355 | IL18RAP | SEH1L    |
| 5  | chr5_150566792  | 17 | chr17_38153473  | 1.081   | 6.754 | 0.009355 | CCDC69  | PSMD3    |
| 1  | chr1_24495839   | 2  | chr2_102967928  | 0.5671  | 6.753 | 0.009358 | IFNLR1  | IL1RL1   |
| 1  | chr1_152282354  | 12 | chr12_56384687  | 0.1497  | 6.753 | 0.00936  | FLG     | RAB5B    |
| 16 | chr16_31332628  | 19 | chr19_10464687  | 0.4586  | 6.751 | 0.009371 | ITGAM   | TYK2     |
| 16 | chr16_11056327  | 16 | chr16_11444716  | 0.2146  | 6.749 | 0.009378 | CLEC16A | RMI2     |
| 1  | chr1_159002222  | 19 | chr19_10103709  | 3.107   | 6.749 | 0.009379 | COL5A3  | IFI16    |
| 1  | chr1_173010707  | 10 | chr10_81058027  | 2.893   | 6.749 | 0.00938  | TNFSF18 | ZMZ1     |
| 2  | chr2_61390097   | 17 | chr17_40459737  | 0.2934  | 6.747 | 0.009388 | C2orf74 | STAT5A   |
| 2  | chr2_102998279  | 21 | chr21_34805286  | 0.1279  | 6.746 | 0.009393 | IFNGR2  | IL18R1   |
| 2  | chr2_103039873  | 6  | chr6_138628488  | 0.29    | 6.747 | 0.009393 | ARFGEF3 | IL18RAP  |
| 2  | chr2_103125466  | 17 | chr17_73752358  | 0.2244  | 6.746 | 0.009395 | ITGB4   | SLC9A4   |



|    |                |    |                 |        |       |          |              |          |
|----|----------------|----|-----------------|--------|-------|----------|--------------|----------|
| 2  | chr2_62728459  | 3  | chr3_121647656  | 5.305  | 6.746 | 0.009396 | SLC15A2      | TMEM17   |
| 14 | chr14_35782032 | 17 | chr17_73888354  | 0.1602 | 6.745 | 0.0094   | PSMA6        | TRIM65   |
| 5  | chr5_96139250  | 18 | chr18_61465672  | 2.645  | 6.745 | 0.009402 | ERAP1        | SERPINB7 |
| 12 | chr12_56744010 | 21 | chr21_34954851  | 3.368  | 6.744 | 0.009405 | DONSON       | STAT2    |
| 2  | chr2_61108996  | 2  | chr2_102959885  | 7.508  | 6.744 | 0.009405 | IL1RL1       | REL      |
| 5  | chr5_158750013 | 9  | chr9_32634619   | 3.87   | 6.744 | 0.009405 | IL12B        | TAF1L    |
| 1  | chr1_152595565 | 5  | chr5_96118852   | 0.5714 | 6.744 | 0.009408 | ERAP1        | LCE3A    |
| 5  | chr5_96119556  | 17 | chr17_38029120  | 16.33  | 6.744 | 0.009408 | ERAP1        | ZPBP2    |
| 1  | chr1_158990412 | 12 | chr12_10251227  | 0.4009 | 6.743 | 0.009409 | CLEC1A       | IFI16    |
| 5  | chr5_150443005 | 12 | chr12_6974926   | 5.438  | 6.743 | 0.009411 | TNIP1        | USP5     |
| 9  | chr9_32632014  | 17 | chr17_78178830  | 0.2335 | 6.743 | 0.009412 | CARD14       | TAF1L    |
| 17 | chr17_40490844 | 19 | chr19_53454387  | 0.3157 | 6.741 | 0.009423 | STAT3        | ZNF816   |
| 1  | chr1_158986477 | 3  | chr3_121659930  | 1.333  | 6.741 | 0.009424 | IFI16        | SLC15A2  |
| 2  | chr2_61108996  | 2  | chr2_103121575  | 0.1597 | 6.74  | 0.009429 | REL          | SLC9A4   |
| 2  | chr2_102984624 | 3  | chr3_121634344  | 0.2247 | 6.739 | 0.009432 | IL18R1       | SLC15A2  |
| 2  | chr2_163134868 | 12 | chr12_6604076   | 3.551  | 6.739 | 0.009432 | IFIH1        | NCAPD2   |
| 17 | chr17_26116762 | 18 | chr18_12978733  | 2.493  | 6.738 | 0.009437 | NOS2         | SEH1L    |
| 16 | chr16_31372344 | 18 | chr18_12978733  | 5.924  | 6.738 | 0.009438 | ITGAX        | SEH1L    |
| 5  | chr5_150411677 | 17 | chr17_38029120  | 0.7159 | 6.738 | 0.009441 | TNIP1        | ZPBP2    |
| 1  | chr1_152770589 | 12 | chr12_6928026   | 0.4611 | 6.736 | 0.009446 | CD4          | LCE1D    |
| 2  | chr2_102968356 | 16 | chr16_31374571  | 19.22  | 6.736 | 0.009446 | IL1RL1       | ITGAX    |
| 1  | chr1_159002510 | 12 | chr12_56744276  | 0.1784 | 6.736 | 0.009447 | IFI16        | STAT2    |
| 1  | chr1_67155976  | 2  | chr2_102960007  | 0.256  | 6.736 | 0.009447 | IL1RL1       | SGIP1    |
| 2  | chr2_103125466 | 11 | chr11_66083174  | 0.2692 | 6.736 | 0.00945  | CD248        | SLC9A4   |
| 1  | chr1_234563154 | 2  | chr2_103040182  | 5.254  | 6.734 | 0.009461 | IL18RAP      | TARBP1   |
| 2  | chr2_103057775 | 16 | chr16_31095251  | 6.474  | 6.733 | 0.009464 | IL18RAP      | PRSS53   |
| 2  | chr2_103040177 | 5  | chr5_96116995   | 3.367  | 6.733 | 0.009465 | ERAP1        | IL18RAP  |
| 17 | chr17_26116619 | 17 | chr17_38031714  | 0.3604 | 6.733 | 0.009466 | NOS2         | ZPBP2    |
| 12 | chr12_56436112 | 17 | chr17_73888354  | 3.525  | 6.732 | 0.009469 | RPS26        | TRIM65   |
| 2  | chr2_62450631  | 9  | chr9_32631426   | 0.2243 | 6.732 | 0.00947  | B3GNT2       | TAF1L    |
| 5  | chr5_96121183  | 12 | chr12_56532718  | 0.2973 | 6.731 | 0.009475 | ERAP1        | ESYT1    |
| 2  | chr2_102984624 | 11 | chr11_128360376 | 6.726  | 6.73  | 0.009478 | ETS1         | IL18R1   |
| 1  | chr1_152770521 | 1  | chr1_158549549  | 6.352  | 6.73  | 0.00948  | LCE1D        | OR10X1   |
| 5  | chr5_150111027 | 19 | chr19_53454387  | 7.683  | 6.73  | 0.009481 | DCTN4        | ZNF816   |
| 2  | chr2_61108996  | 20 | chr20_48565754  | 9.154  | 6.727 | 0.009496 | REL          | RNF114   |
| 1  | chr1_12249031  | 6  | chr6_111913273  | 0.2408 | 6.727 | 0.009497 | TNFRSF1B     | TRAF3IP2 |
| 5  | chr5_131671659 | 5  | chr5_158705065  | 2.692  | 6.727 | 0.009497 | SLC22A4      | UBLCP1   |
| 2  | chr2_102998279 | 5  | chr5_132036004  | 0.2718 | 6.727 | 0.009499 | IL18R1       | KIF3A    |
| 9  | chr9_32630600  | 12 | chr12_56744445  | 8.212  | 6.726 | 0.0095   | STAT2        | TAF1L    |
| 1  | chr1_207014445 | 2  | chr2_102984671  | 3.801  | 6.725 | 0.009505 | IL18R1       | IL19     |
| 1  | chr1_7879569   | 2  | chr2_62728046   | 0.116  | 6.725 | 0.009506 | PER3         | TMEM17   |
| 1  | chr1_158986477 | 16 | chr16_11003860  | 0.2054 | 6.725 | 0.009507 | CIITA        | IFI16    |
| 2  | chr2_61175288  | 17 | chr17_40481529  | 0.3569 | 6.725 | 0.009508 | PUS10        | STAT3    |
| 4  | chr4_103500091 | 17 | chr17_78117807  | 3.816  | 6.725 | 0.009509 | EIF4A3       | NFKB1    |
| 1  | chr1_159002222 | 20 | chr20_48522414  | 0.448  | 6.724 | 0.00951  | IFI16        | SPATA2   |
| 5  | chr5_96249323  | 11 | chr11_64075044  | 4.42   | 6.724 | 0.009515 | ERAP2        | ESRRA    |
| 2  | chr2_102967928 | 3  | chr3_169500454  | 2.662  | 6.723 | 0.00952  | IL1RL1       | MYNN     |
| 1  | chr1_11917786  | 2  | chr2_163136727  | 0.1378 | 6.722 | 0.009524 | IFIH1        | NPPB     |
| 10 | chr10_81058027 | 11 | chr11_63680101  | 0.2611 | 6.722 | 0.009525 | RCOR2        | ZMIZ1    |
| 5  | chr5_96117300  | 12 | chr12_56748590  | 0.2922 | 6.721 | 0.009529 | ERAP1        | STAT2    |
| 8  | chr8_3226856   | 17 | chr17_26084532  | 0.2159 | 6.721 | 0.009529 | CSMD1        | NOS2     |
| 2  | chr2_102967928 | 4  | chr4_103635674  | 0.1905 | 6.72  | 0.009534 | IL1RL1       | MANBA    |
| 17 | chr17_26110215 | 19 | chr19_10104154  | 0.2102 | 6.719 | 0.009537 | COL5A3       | NOS2     |
| 2  | chr2_102642514 | 19 | chr19_49206631  | 0.3746 | 6.719 | 0.009539 | FUT2         | IL1R2    |
| 4  | chr4_103594938 | 5  | chr5_79374474   | 0.4786 | 6.719 | 0.009539 | CTD-220118.1 | MANBA    |
| 17 | chr17_40854482 | 19 | chr19_49573245  | 9.226  | 6.718 | 0.009543 | EZH1         | KCNA7    |
| 4  | chr4_103561106 | 19 | chr19_49656355  | 3.648  | 6.718 | 0.009543 | HRC          | MANBA    |
| 14 | chr14_35778161 | 19 | chr19_10104272  | 4.746  | 6.718 | 0.009545 | COL5A3       | PSMA6    |
| 2  | chr2_62733253  | 5  | chr5_132037889  | 4.064  | 6.717 | 0.009548 | KIF3A        | TMEM17   |
| 10 | chr10_90034899 | 13 | chr13_40298646  | 2.576  | 6.717 | 0.009549 | COG6         | RNLS     |
| 5  | chr5_150566792 | 12 | chr12_56532750  | 0.5535 | 6.717 | 0.009549 | CCDC69       | ESYT1    |
| 12 | chr12_6619284  | 16 | chr16_31230867  | 0.2819 | 6.717 | 0.00955  | NCAPD2       | TRIM72   |
| 5  | chr5_79768604  | 16 | chr16_11444716  | 2.56   | 6.717 | 0.009551 | RMI2         | ZFYVE16  |
| 1  | chr1_206944791 | 5  | chr5_96129512   | 0.1748 | 6.716 | 0.009556 | ERAP1        | IL10     |

|    |                 |    |                 |        |       |          |          |              |
|----|-----------------|----|-----------------|--------|-------|----------|----------|--------------|
| 4  | chr4_103534560  | 14 | chr14_35780073  | 0.2703 | 6.715 | 0.009561 | NFKB1    | PSMA6        |
| 1  | chr1_8416300    | 2  | chr2_102641201  | 6.503  | 6.715 | 0.009562 | IL1R2    | RERE         |
| 3  | chr3_121642101  | 5  | chr5_150496853  | 5.23   | 6.715 | 0.009563 | ANXA6    | SLC15A2      |
| 3  | chr3_121643931  | 5  | chr5_96237114   | 2.152  | 6.714 | 0.009564 | ERAP2    | SLC15A2      |
| 5  | chr5_131785536  | 5  | chr5_150413406  | 0.3353 | 6.714 | 0.009566 | C5orf56  | TNIP1        |
| 16 | chr16_11016073  | 17 | chr17_78178830  | 0.1796 | 6.714 | 0.009568 | CARD14   | CIITA        |
| 2  | chr2_102984671  | 17 | chr17_73564912  | 0.0585 | 6.714 | 0.009568 | IL18R1   | LLGL2        |
| 1  | chr1_152195718  | 1  | chr1_152329369  | 4.014  | 6.712 | 0.009579 | FLG2     | HRNR         |
| 12 | chr12_111963030 | 14 | chr14_35761675  | 0.2858 | 6.712 | 0.009579 | ATXN2    | PSMA6        |
| 2  | chr2_102968356  | 12 | chr12_56491601  | 5.869  | 6.71  | 0.009585 | ERBB3    | IL1RL1       |
| 4  | chr4_103553090  | 10 | chr10_101643911 | 5.218  | 6.711 | 0.009585 | DNMBP    | MANBA        |
| 2  | chr2_102984624  | 12 | chr12_6604632   | 0.1693 | 6.71  | 0.009588 | IL18R1   | NCAPD2       |
| 17 | chr17_40459737  | 18 | chr18_61654356  | 0.3267 | 6.71  | 0.009589 | SERPINB8 | STAT5A       |
| 1  | chr1_152283271  | 2  | chr2_103011237  | 7.183  | 6.709 | 0.009595 | FLG      | IL18R1       |
| 2  | chr2_62728105   | 18 | chr18_12979041  | 0.8906 | 6.708 | 0.009596 | SEH1L    | TMEM17       |
| 1  | chr1_159002222  | 3  | chr3_18436459   | 0.3488 | 6.708 | 0.009597 | IFI16    | SATB1        |
| 5  | chr5_96252998   | 12 | chr12_6909388   | 0.1074 | 6.708 | 0.0096   | CD4      | ERAP2        |
| 5  | chr5_96119556   | 17 | chr17_38031714  | 16.21  | 6.707 | 0.009606 | ERAP1    | ZBPB2        |
| 2  | chr2_103006448  | 3  | chr3_121649809  | 2.753  | 6.705 | 0.009613 | IL18R1   | SLC15A2      |
| 1  | chr1_158548793  | 2  | chr2_102967928  | 2.451  | 6.705 | 0.009615 | IL1RL1   | OR10X1       |
| 2  | chr2_163137994  | 19 | chr19_10114033  | 0.4802 | 6.704 | 0.009621 | COL5A3   | IFIH1        |
| 3  | chr3_101443494  | 17 | chr17_38031714  | 7.246  | 6.704 | 0.009621 | CEP97    | ZBPB2        |
| 2  | chr2_103040177  | 2  | chr2_103090127  | 1.165  | 6.702 | 0.009632 | IL18RAP  | SLC9A4       |
| 10 | chr10_101643750 | 20 | chr20_48467560  | 0.3599 | 6.701 | 0.009636 | DNMBP    | SLC9A8       |
| 2  | chr2_103001485  | 14 | chr14_35761592  | 3.889  | 6.701 | 0.009636 | IL18R1   | PSMA6        |
| 12 | chr12_6619284   | 17 | chr17_38153634  | 0.3146 | 6.701 | 0.009638 | NCAPD2   | PSMD3        |
| 2  | chr2_103125457  | 5  | chr5_131755717  | 0.4703 | 6.7   | 0.009641 | C5orf56  | SLC9A4       |
| 1  | chr1_234563154  | 2  | chr2_102998279  | 4.026  | 6.7   | 0.009643 | IL18R1   | TARBP1       |
| 12 | chr12_56532718  | 20 | chr20_48467560  | 1.66   | 6.699 | 0.009644 | ESYT1    | SLC9A8       |
| 1  | chr1_234607104  | 11 | chr11_128360376 | 6.696  | 6.699 | 0.009645 | ETS1     | TARBP1       |
| 19 | chr19_10073486  | 19 | chr19_10464687  | 0.3459 | 6.699 | 0.009646 | COL5A3   | TYK2         |
| 2  | chr2_62728046   | 19 | chr19_49693743  | 2.825  | 6.699 | 0.009647 | TMEM17   | TRPM4        |
| 1  | chr1_25678132   | 4  | chr4_103534560  | 0.4317 | 6.699 | 0.009648 | NFKB1    | TMEM50A      |
| 2  | chr2_61175204   | 17 | chr17_38153473  | 2.951  | 6.699 | 0.009648 | PSMD3    | PUS10        |
| 6  | chr6_111912800  | 17 | chr17_78166385  | 3.512  | 6.698 | 0.009655 | CARD14   | TRAF3IP2     |
| 6  | chr6_138195723  | 19 | chr19_10081322  | 2.194  | 6.697 | 0.009657 | COL5A3   | TNFAIP3      |
| 10 | chr10_75564556  | 17 | chr17_38153554  | 0.2633 | 6.697 | 0.009658 | NDST2    | PSMD3        |
| 1  | chr1_152770521  | 13 | chr13_40251725  | 0.362  | 6.697 | 0.00966  | COG6     | LCE1D        |
| 12 | chr12_6483463   | 13 | chr13_40298646  | 2.906  | 6.696 | 0.00966  | COG6     | SCNN1A       |
| 2  | chr2_102968362  | 6  | chr6_111887624  | 0.4408 | 6.696 | 0.009662 | IL1RL1   | TRAF3IP2-AS1 |
| 2  | chr2_103090127  | 3  | chr3_121649809  | 0.5175 | 6.696 | 0.009663 | SLC15A2  | SLC9A4       |
| 3  | chr3_121646806  | 5  | chr5_96121994   | 1.182  | 6.695 | 0.009667 | ERAP1    | SLC15A2      |
| 4  | chr4_103488278  | 17 | chr17_78178189  | 0.3323 | 6.695 | 0.009667 | CARD14   | NFKB1        |
| 2  | chr2_103095494  | 17 | chr17_77753128  | 18.41  | 6.694 | 0.009672 | CBX2     | SLC9A4       |
| 2  | chr2_103040945  | 6  | chr6_398878     | 0.383  | 6.693 | 0.009679 | IL18RAP  | IRF4         |
| 1  | chr1_158986225  | 3  | chr3_101571838  | 0.1569 | 6.692 | 0.009684 | IFI16    | NFKBIZ       |
| 4  | chr4_103571832  | 18 | chr18_12979041  | 5.459  | 6.692 | 0.009685 | MANBA    | SEH1L        |
| 17 | chr17_74288578  | 17 | chr17_78178182  | 2.782  | 6.691 | 0.00969  | CARD14   | QRICH2       |
| 2  | chr2_103011108  | 17 | chr17_78178170  | 0.2551 | 6.691 | 0.009691 | CARD14   | IL18R1       |
| 1  | chr1_12249031   | 1  | chr1_152283119  | 0.1892 | 6.689 | 0.0097   | FLG      | TNFRSF1B     |
| 11 | chr11_63974554  | 11 | chr11_65422853  | 2.903  | 6.689 | 0.009702 | FERMT3   | RELA         |
| 17 | chr17_26084532  | 21 | chr21_34876665  | 4.567  | 6.688 | 0.009705 | GART     | NOS2         |
| 17 | chr17_38073517  | 20 | chr20_48599549  | 0.2746 | 6.687 | 0.009711 | GSDMB    | SNAI1        |
| 2  | chr2_61128196   | 5  | chr5_150443005  | 5.684  | 6.687 | 0.009714 | REL      | TNIP1        |
| 12 | chr12_56363520  | 19 | chr19_49206631  | 5.224  | 6.686 | 0.009715 | CDK2     | FUT2         |
| 6  | chr6_138198365  | 17 | chr17_38031714  | 0.1759 | 6.686 | 0.009715 | TNFAIP3  | ZBPB2        |
| 1  | chr1_158986225  | 20 | chr20_48522414  | 0.4555 | 6.686 | 0.009716 | IFI16    | SPATA2       |
| 2  | chr2_103040945  | 5  | chr5_79374767   | 3.103  | 6.685 | 0.009725 | IL18RAP  | THBS4        |
| 1  | chr1_159002222  | 1  | chr1_234608381  | 0.74   | 6.684 | 0.009728 | IFI16    | TARBP1       |
| 5  | chr5_96121715   | 19 | chr19_10463102  | 2.286  | 6.684 | 0.009729 | ERAP1    | TYK2         |
| 12 | chr12_6623976   | 17 | chr17_38153473  | 0.167  | 6.683 | 0.009732 | NCAPD2   | PSMD3        |
| 12 | chr12_6604076   | 16 | chr16_31230867  | 0.2829 | 6.683 | 0.009734 | NCAPD2   | TRIM72       |
| 2  | chr2_163136771  | 4  | chr4_103557219  | 1.136  | 6.682 | 0.009738 | IFIH1    | MANBA        |
| 12 | chr12_56744988  | 21 | chr21_34954851  | 9.224  | 6.682 | 0.009741 | DONSON   | STAT2        |

|    |                 |    |                |         |       |          |        |              |
|----|-----------------|----|----------------|---------|-------|----------|--------|--------------|
| 5  | chr5_96117555   | 5  | chr5_96339273  | 5.139   | 6.681 | 0.009746 | ERAP1  | LNPEP        |
| 16 | chr16_11363064  | 20 | chr20_48467560 | 4.643   | 6.681 | 0.009747 | SLC9A8 | TNP2         |
| 2  | chr2_102984671  | 12 | chr12_56744988 | 3.975   | 6.68  | 0.009749 | IL18R1 | STAT2        |
| 19 | chr19_10467370  | 19 | chr19_49206631 | 2.641   | 6.679 | 0.009754 | FUT2   | TYK2         |
| 1  | chr1_152770521  | 12 | chr12_56384636 | 3.474   | 6.679 | 0.009757 | LCE1D  | RAB5B        |
| 5  | chr5_150566792  | 14 | chr14_35780167 | 2.789   | 6.678 | 0.009761 | CCDC69 | PSMA6        |
| 18 | chr18_12978733  | 21 | chr21_34876665 | 10.79   | 6.678 | 0.009762 | GART   | SEH1L        |
| 5  | chr5_79735888   | 19 | chr19_10108850 | 0.2326  | 6.677 | 0.009764 | COL5A3 | ZFYVE16      |
| 5  | chr5_96124447   | 16 | chr16_31339529 | 0.3491  | 6.677 | 0.009765 | ERAP1  | ITGAM        |
| 2  | chr2_62733253   | 19 | chr19_10248318 | 4.585   | 6.677 | 0.009766 | DNMT1  | TMEM17       |
| 3  | chr3_121643931  | 5  | chr5_96232222  | 2.147   | 6.676 | 0.009771 | ERAP2  | SLC15A2      |
| 1  | chr1_152328381  | 5  | chr5_96237114  | 0.28    | 6.676 | 0.009774 | ERAP2  | FLG2         |
| 5  | chr5_150444664  | 17 | chr17_78178170 | 0.2522  | 6.675 | 0.009777 | CARD14 | TNIP1        |
| 2  | chr2_163291617  | 17 | chr17_38068764 | 9.706   | 6.675 | 0.009779 | GSDMB  | KCNH7        |
| 5  | chr5_96117300   | 17 | chr17_26125743 | 0.3174  | 6.674 | 0.009785 | ERAP1  | NOS2         |
| 12 | chr12_6626577   | 17 | chr17_40716235 | 0.3435  | 6.672 | 0.009794 | COASY  | NCAPD2       |
| 5  | chr5_96222183   | 19 | chr19_10460737 | 0.1935  | 6.672 | 0.009794 | ERAP2  | TYK2         |
| 1  | chr1_152770589  | 12 | chr12_6619022  | 0.1386  | 6.672 | 0.009796 | LCE1D  | NCAPD2       |
| 10 | chr10_81056383  | 12 | chr12_56537544 | 5.157   | 6.672 | 0.009796 | ESYT1  | ZMZ1         |
| 5  | chr5_96139435   | 17 | chr17_38153473 | 2.633   | 6.671 | 0.009797 | ERAP1  | PSMD3        |
| 6  | chr6_111922458  | 19 | chr19_10104272 | 0.2203  | 6.671 | 0.009797 | COL5A3 | TRAF3IP2-AS1 |
| 1  | chr1_8075575    | 4  | chr4_103557219 | 2.607   | 6.671 | 0.009798 | ERRFI1 | MANBA        |
| 4  | chr4_103571832  | 5  | chr5_96513471  | 2.78    | 6.671 | 0.009798 | MANBA  | RIOK2        |
| 5  | chr5_96339273   | 17 | chr17_26125933 | 0.2828  | 6.671 | 0.009799 | LNPEP  | NOS2         |
| 5  | chr5_96118852   | 6  | chr6_138192761 | 1.178   | 6.669 | 0.00981  | ERAP1  | TNFAIP3      |
| 1  | chr1_152595565  | 5  | chr5_96129512  | 0.55    | 6.668 | 0.009818 | ERAP1  | LCE3A        |
| 1  | chr1_67795430   | 17 | chr17_78178189 | 3.98    | 6.667 | 0.009819 | CARD14 | IL12RB2      |
| 1  | chr1_67155800   | 2  | chr2_163149896 | 6.187   | 6.666 | 0.009825 | IFIH1  | SGIP1        |
| 5  | chr5_96124296   | 12 | chr12_56492683 | 4.414   | 6.666 | 0.009827 | ERAP1  | ERBB3        |
| 5  | chr5_96222185   | 18 | chr18_61646998 | 3.025   | 6.666 | 0.009829 | ERAP2  | SERPINB8     |
| 4  | chr4_103537442  | 16 | chr16_31332719 | 0.344   | 6.665 | 0.00983  | ITGAM  | NFKB1        |
| 3  | chr3_169491944  | 20 | chr20_48599549 | 2.417   | 6.665 | 0.009832 | MYNN   | SNAI1        |
| 2  | chr2_163136727  | 17 | chr17_26084296 | 2.908   | 6.665 | 0.009834 | IFIH1  | NOS2         |
| 1  | chr1_67705963   | 2  | chr2_102641201 | 5.365   | 6.665 | 0.009835 | IL1R2  | IL23R        |
| 1  | chr1_7910969    | 1  | chr1_158990412 | 0.2941  | 6.664 | 0.009838 | IFI16  | UTS2         |
| 2  | chr2_102960007  | 10 | chr10_81056383 | 1.177   | 6.663 | 0.009843 | IL1RL1 | ZMZ1         |
| 1  | chr1_152770589  | 2  | chr2_61149221  | 0.1808  | 6.662 | 0.009847 | LCE1D  | REL          |
| 16 | chr16_31373452  | 18 | chr18_12984340 | 2.547   | 6.662 | 0.009851 | ITGAX  | SEH1L        |
| 5  | chr5_96232222   | 19 | chr19_10460737 | 0.1882  | 6.661 | 0.009857 | ERAP2  | TYK2         |
| 2  | chr2_102968211  | 18 | chr18_12951951 | 5.092   | 6.66  | 0.009858 | IL1RL1 | SEH1L        |
| 2  | chr2_102955683  | 17 | chr17_40854650 | 2.814   | 6.659 | 0.009864 | EZHI   | IL1RL1       |
| 5  | chr5_96117300   | 17 | chr17_26105797 | 3.397   | 6.659 | 0.009864 | ERAP1  | NOS2         |
| 16 | chr16_31421719  | 17 | chr17_78178182 | 0.1716  | 6.658 | 0.009871 | CARD14 | ITGAD        |
| 2  | chr2_163256877  | 5  | chr5_96339273  | 2.417   | 6.658 | 0.009873 | KCNH7  | LNPEP        |
| 11 | chr11_128350126 | 17 | chr17_38153554 | 0.4003  | 6.657 | 0.009877 | ETS1   | PSMD3        |
| 1  | chr1_152770521  | 5  | chr5_150439848 | 2.984   | 6.657 | 0.009878 | LCE1D  | TNIP1        |
| 2  | chr2_102641201  | 8  | chr8_3611563   | 0.5321  | 6.657 | 0.009879 | CSMD1  | IL1R2        |
| 5  | chr5_150439897  | 17 | chr17_38029120 | 4.291   | 6.657 | 0.009879 | TNIP1  | ZBPB2        |
| 1  | chr1_26358755   | 1  | chr1_234607086 | 28.89   | 6.656 | 0.009881 | EXTL1  | TARBP1       |
| 2  | chr2_103125466  | 17 | chr17_40481596 | 0.5227  | 6.656 | 0.009881 | SLC9A4 | STAT3        |
| 5  | chr5_158705065  | 9  | chr9_32634519  | 0.416   | 6.656 | 0.009882 | TAF1L  | UBLCP1       |
| 5  | chr5_96121069   | 8  | chr8_3611563   | 1.991   | 6.654 | 0.009892 | CSMD1  | ERAP1        |
| 1  | chr1_7879545    | 10 | chr10_90034899 | 0.2533  | 6.653 | 0.0099   | PER3   | RNLS         |
| 1  | chr1_152283331  | 4  | chr4_103561106 | 0.1219  | 6.651 | 0.009909 | FLG    | MANBA        |
| 1  | chr1_152732436  | 5  | chr5_150499016 | 2.295   | 6.651 | 0.009909 | ANXA6  | KPRP         |
| 2  | chr2_163136771  | 5  | chr5_150704758 | 1.625   | 6.65  | 0.009914 | IFIH1  | SLC36A2      |
| 2  | chr2_61128196   | 17 | chr17_78178830 | 0.2072  | 6.649 | 0.009923 | CARD14 | REL          |
| 2  | chr2_163230276  | 21 | chr21_34876708 | 2.81    | 6.648 | 0.009924 | GART   | KCNH7        |
| 18 | chr18_61649161  | 19 | chr19_10104154 | 4.577   | 6.647 | 0.009931 | COL5A3 | SERPINB8     |
| 1  | chr1_172635038  | 12 | chr12_6483463  | 0.357   | 6.647 | 0.009932 | FASLG  | SCNN1A       |
| 12 | chr12_56384687  | 16 | chr16_31283312 | 0.05674 | 6.646 | 0.009935 | ITGAM  | RAB5B        |
| 1  | chr1_234563154  | 2  | chr2_102957348 | 5.197   | 6.646 | 0.009936 | IL1RL1 | TARBP1       |
| 2  | chr2_102968007  | 12 | chr12_6604632  | 0.1707  | 6.646 | 0.009936 | IL1RL1 | NCAPD2       |
| 5  | chr5_96237114   | 19 | chr19_10460737 | 0.1886  | 6.645 | 0.009941 | ERAP2  | TYK2         |

|    |                |    |                |        |       |          |        |           |
|----|----------------|----|----------------|--------|-------|----------|--------|-----------|
| 2  | chr2_103040945 | 17 | chr17_40854482 | 3.976  | 6.645 | 0.009944 | EZH1   | IL18RAP   |
| 7  | chr7_37251085  | 17 | chr17_78178189 | 1.885  | 6.645 | 0.009944 | CARD14 | ELM01     |
| 17 | chr17_73723363 | 20 | chr20_48467560 | 0.3127 | 6.644 | 0.00995  | ITGB4  | SLC9A8    |
| 2  | chr2_102641201 | 16 | chr16_31388246 | 2.704  | 6.643 | 0.009952 | IL1R2  | ITGAX     |
| 7  | chr7_37355628  | 12 | chr12_6861043  | 0.2789 | 6.642 | 0.009958 | ELM01  | MLF2      |
| 1  | chr1_7879491   | 1  | chr1_158990412 | 0.273  | 6.642 | 0.009961 | IFI16  | PER3      |
| 1  | chr1_152681722 | 1  | chr1_158987941 | 0.4362 | 6.642 | 0.009963 | IFI16  | LCE4A     |
| 2  | chr2_102959885 | 5  | chr5_96249323  | 3.932  | 6.642 | 0.009963 | ERAP2  | IL1RL1    |
| 14 | chr14_35761675 | 19 | chr19_10080650 | 3.36   | 6.64  | 0.009971 | COL5A3 | PSMA6     |
| 12 | chr12_6623976  | 17 | chr17_38153554 | 0.1679 | 6.64  | 0.009973 | NCAPD2 | PSMD3     |
| 1  | chr1_152326252 | 16 | chr16_10998482 | 3.217  | 6.639 | 0.009975 | CIITA  | FLG2      |
| 1  | chr1_152283271 | 2  | chr2_103006448 | 7.11   | 6.639 | 0.009976 | FLG    | IL18R1    |
| 7  | chr7_37053051  | 19 | chr19_10085062 | 0.1148 | 6.639 | 0.009978 | COL5A3 | ELM01-AS1 |
| 2  | chr2_103040945 | 8  | chr8_3889595   | 0.4572 | 6.638 | 0.009983 | CSMD1  | IL18RAP   |
| 11 | chr11_9853777  | 12 | chr12_6636202  | 6.005  | 6.637 | 0.009988 | NCAPD2 | SBF2      |
| 13 | chr13_99890720 | 19 | chr19_10108850 | 4.429  | 6.636 | 0.009994 | COL5A3 | UBAC2     |
| 12 | chr12_6604076  | 22 | chr22_22162059 | 2.816  | 6.636 | 0.009996 | MAPK1  | NCAPD2    |
| 17 | chr17_40459737 | 18 | chr18_12951951 | 0.342  | 6.635 | 0.009998 | SEHL   | STAT5A    |
