# Supplementary material for: Gene interaction analysis of psoriasis in Chinese Han population
Source: PubMed Central journal article supplement — Mol Genet Genomic Med. 2022 Mar 30;10(5):e1858. doi: 10.1002/mgg3.1858 (PMC9034666; doi:10.1002/mgg3.1858), 2022-03-30
Supplement: MGG3-10-e1858-s002.pdf [file MGG3-10-e1858-s002.pdf]

| CHR1 | SNP1            | CHR2 | SNP2            | OR_INT  | STAT  | P         | Gene 1   | Gene 2    |
|------|-----------------|------|-----------------|---------|-------|-----------|----------|-----------|
| 1    | chr1_12253062   | 1    | chr1_206239574  | 7.223   | 17.57 | 2.77E-05  | C1orf186 | TNFRSF1B  |
| 2    | chr2_103136446  | 19   | chr19_10103583  | 1.585   | 17.34 | 3.13E-05  | COL5A3   | SLC9A4    |
| 2    | chr2_103136309  | 19   | chr19_10103583  | 1.563   | 16.55 | 4.73E-05  | COL5A3   | SLC9A4    |
| 2    | chr2_103136446  | 19   | chr19_10102567  | 1.561   | 16.32 | 5.34E-05  | COL5A3   | SLC9A4    |
| 2    | chr2_103136446  | 19   | chr19_10102676  | 1.549   | 16.07 | 6.10E-05  | COL5A3   | SLC9A4    |
| 2    | chr2_103095404  | 19   | chr19_10090634  | 1.881   | 15.95 | 6.51E-05  | COL5A3   | SLC9A4    |
| 2    | chr2_103136446  | 19   | chr19_10099910  | 1.57    | 15.81 | 6.99E-05  | COL5A3   | SLC9A4    |
| 12   | chr12_112518803 | 17   | chr17_78221850  | 1.582   | 15.75 | 7.21E-05  | NAA25    | SLC26A11  |
| 2    | chr2_103136309  | 19   | chr19_10099910  | 1.559   | 15.43 | 8.57E-05  | COL5A3   | SLC9A4    |
| 2    | chr2_103136309  | 19   | chr19_10102676  | 1.527   | 15.29 | 9.24E-05  | COL5A3   | SLC9A4    |
| 2    | chr2_103136309  | 19   | chr19_10102567  | 1.532   | 15.16 | 9.89E-05  | COL5A3   | SLC9A4    |
| 5    | chr5_150647040  | 5    | chr5_150901597  | 2.421   | 14.71 | 0.0001251 | FAT2     | GM2A      |
| 12   | chr12_112518803 | 17   | chr17_78215566  | 1.548   | 14.61 | 0.0001323 | NAA25    | SLC26A11  |
| 11   | chr11_66031660  | 13   | chr13_20763612  | 0.3825  | 14.44 | 0.000145  | GJB2     | KLC2      |
| 5    | chr5_150647040  | 5    | chr5_150908813  | 2.348   | 14.08 | 0.000175  | FAT2     | GM2A      |
| 5    | chr5_150647040  | 5    | chr5_150905398  | 2.312   | 14    | 0.0001825 | FAT2     | GM2A      |
| 1    | chr1_12253062   | 1    | chr1_206239993  | 5.239   | 13.92 | 0.0001905 | C1orf186 | TNFRSF1B  |
| 1    | chr1_11860458   | 1    | chr1_152552461  | 0.4297  | 12.11 | 0.0005013 | LCE3D    | MTHFR     |
| 1    | chr1_11860458   | 7    | chr7_31682601   | 0.3033  | 11.37 | 0.0007478 | CCDC129  | MTHFR     |
| 2    | chr2_102984279  | 12   | chr12_122703014 | 1.568   | 11.33 | 0.0007613 | DIABLO   | IL18R1    |
| 2    | chr2_103149100  | 5    | chr5_150908813  | 0.5332  | 10.64 | 0.001106  | FAT2     | SLC9A4    |
| 12   | chr12_56348028  | 21   | chr21_34926043  | 1.667   | 10.33 | 0.001311  | PMEL     | SON       |
| 5    | chr5_79773028   | 19   | chr19_10251747  | 2.696   | 10.25 | 0.001367  | DNMT1    | ZFYVE16   |
| 5    | chr5_95728974   | 5    | chr5_150905398  | 1.843   | 10.25 | 0.001369  | FAT2     | PCSK1     |
| 5    | chr5_79745469   | 19   | chr19_10251747  | 2.546   | 10.14 | 0.00145   | DNMT1    | ZFYVE16   |
| 5    | chr5_150647040  | 5    | chr5_150867452  | 2.049   | 9.93  | 0.001626  | GM2A     | SLC36A1   |
| 12   | chr12_112110489 | 17   | chr17_78221850  | 1.537   | 9.325 | 0.002261  | BRAP     | SLC26A11  |
| 12   | chr12_56348028  | 21   | chr21_34945721  | 1.594   | 9.145 | 0.002494  | PMEL     | SON       |
| 5    | chr5_150632832  | 5    | chr5_150905398  | 2.013   | 9.046 | 0.002632  | FAT2     | GM2A      |
| 2    | chr2_103001402  | 19   | chr19_10090634  | 1.483   | 9.032 | 0.002653  | COL5A3   | IL18R1    |
| 1    | chr1_234566085  | 17   | chr17_78221850  | 0.6641  | 8.802 | 0.003009  | SLC26A11 | TARBP1    |
| 17   | chr17_73847613  | 21   | chr21_34945721  | 1.72    | 8.582 | 0.003394  | SON      | WBP2      |
| 1    | chr1_158549420  | 18   | chr18_12429313  | 0.7048  | 8.533 | 0.003488  | OR10X1   | PRELID3A  |
| 1    | chr1_152195579  | 2    | chr2_102984279  | 1.428   | 8.52  | 0.003513  | HRNR     | IL18R1    |
| 5    | chr5_150632832  | 5    | chr5_150901597  | 2.004   | 8.473 | 0.003606  | FAT2     | GM2A      |
| 5    | chr5_95728974   | 5    | chr5_150908813  | 1.742   | 8.385 | 0.003783  | FAT2     | PCSK1     |
| 5    | chr5_95728898   | 5    | chr5_150905398  | 1.734   | 8.369 | 0.003816  | FAT2     | PCSK1     |
| 5    | chr5_131671599  | 17   | chr17_78221850  | 0.01378 | 8.352 | 0.003852  | SLC22A4  | SLC26A11  |
| 2    | chr2_103149100  | 5    | chr5_150905398  | 0.5813  | 8.276 | 0.004017  | FAT2     | SLC9A4    |
| 5    | chr5_95728974   | 5    | chr5_150901597  | 1.746   | 8.235 | 0.004109  | FAT2     | PCSK1     |
| 1    | chr1_26898098   | 11   | chr11_64037679  | 0.01256 | 8.222 | 0.004139  | BAD      | RPS6KA1   |
| 1    | chr1_158549492  | 18   | chr18_12429313  | 0.71    | 8.185 | 0.004224  | OR10X1   | PRELID3A  |
| 5    | chr5_150632832  | 5    | chr5_150908813  | 1.954   | 8.053 | 0.004542  | FAT2     | GM2A      |
| 5    | chr5_131670546  | 17   | chr17_73997474  | 1.603   | 7.992 | 0.004697  | SLC22A4  | TEN1-CDK3 |
| 5    | chr5_150632832  | 5    | chr5_150867452  | 1.947   | 7.931 | 0.004858  | GM2A     | SLC36A1   |
| 2    | chr2_103141447  | 5    | chr5_150908813  | 0.5834  | 7.898 | 0.004948  | FAT2     | SLC9A4    |
| 17   | chr17_73847799  | 21   | chr21_34945721  | 1.666   | 7.829 | 0.00514   | SON      | WBP2      |
| 6    | chr6_138655939  | 17   | chr17_73847799  | 5.509   | 7.815 | 0.005182  | ARFGEF3  | WBP2      |
| 1    | chr1_234566085  | 17   | chr17_78215566  | 0.6893  | 7.679 | 0.005588  | SLC26A11 | TARBP1    |
| 5    | chr5_131671599  | 17   | chr17_78215566  | 0.0295  | 7.589 | 0.005871  | SLC22A4  | SLC26A11  |
| 6    | chr6_138655939  | 17   | chr17_73847613  | 5.356   | 7.548 | 0.006007  | ARFGEF3  | WBP2      |
| 1    | chr1_26900698   | 11   | chr11_64037679  | 0.04272 | 7.451 | 0.006341  | BAD      | RPS6KA1   |
| 2    | chr2_103149100  | 5    | chr5_150901597  | 0.5975  | 7.407 | 0.006497  | FAT2     | SLC9A4    |
| 1    | chr1_234582651  | 17   | chr17_78221850  | 1.38    | 7.367 | 0.006645  | SLC26A11 | TARBP1    |
| 12   | chr12_6637845   | 18   | chr18_13103660  | 0.4158  | 7.348 | 0.006715  | CEP192   | NCAPD2    |
| 12   | chr12_7023123   | 17   | chr17_76421467  | 0.4435  | 7.319 | 0.006825  | DNAH17   | LRRC23    |
| 12   | chr12_7023123   | 17   | chr17_76421464  | 0.4438  | 7.308 | 0.006863  | DNAH17   | LRRC23    |
| 17   | chr17_73847613  | 21   | chr21_34876708  | 1.661   | 7.289 | 0.006937  | GART     | WBP2      |
| 2    | chr2_103001402  | 19   | chr19_10099910  | 1.361   | 7.284 | 0.006957  | COL5A3   | IL18R1    |
| 1    | chr1_27089446   | 1    | chr1_234594947  | 4.094   | 7.253 | 0.007078  | ARID1A   | TARBP1    |

|    |                 |    |                |         |       |          |          |           |
|----|-----------------|----|----------------|---------|-------|----------|----------|-----------|
| 5  | chr5_95728898   | 5  | chr5_150901597 | 1.683   | 7.252 | 0.007084 | FAT2     | PCSK1     |
| 1  | chr1_152285930  | 2  | chr2_102984279 | 1.386   | 7.235 | 0.007151 | FLG      | IL18R1    |
| 12 | chr12_7023123   | 17 | chr17_76425176 | 0.4454  | 7.231 | 0.007166 | DNAH17   | LRRRC23   |
| 12 | chr12_112110489 | 17 | chr17_78215566 | 1.443   | 7.231 | 0.007167 | BRAP     | SLC26A11  |
| 5  | chr5_95728898   | 5  | chr5_150908813 | 1.669   | 7.223 | 0.007197 | FAT2     | PCSK1     |
| 1  | chr1_26883412   | 11 | chr11_64037679 | 0.02669 | 7.166 | 0.007428 | BAD      | RPS6KA1   |
| 1  | chr1_26887980   | 11 | chr11_64037679 | 0.02669 | 7.166 | 0.007428 | BAD      | RPS6KA1   |
| 17 | chr17_73847799  | 21 | chr21_34876708 | 1.649   | 7.146 | 0.007512 | GART     | WBP2      |
| 1  | chr1_27089446   | 1  | chr1_234584231 | 4.105   | 7.085 | 0.007773 | ARID1A   | TARBP1    |
| 1  | chr1_234584231  | 17 | chr17_78221850 | 1.373   | 7.078 | 0.007802 | SLC26A11 | TARBP1    |
| 12 | chr12_6637845   | 18 | chr18_13059173 | 0.4169  | 7.071 | 0.007835 | CEP192   | NCAPD2    |
| 5  | chr5_131663062  | 17 | chr17_73997474 | 1.545   | 7.045 | 0.00795  | SLC22A4  | TEN1-CDK3 |
| 1  | chr1_152280372  | 12 | chr12_6970635  | 2.524   | 7.036 | 0.007989 | FLG      | USP5      |
| 5  | chr5_131720070  | 17 | chr17_73997474 | 1.55    | 6.97  | 0.008291 | SLC22A5  | TEN1-CDK3 |
| 1  | chr1_234582651  | 17 | chr17_78215566 | 1.362   | 6.884 | 0.008696 | SLC26A11 | TARBP1    |
| 1  | chr1_152192555  | 2  | chr2_102984279 | 1.372   | 6.841 | 0.008908 | HRNR     | IL18R1    |
| 1  | chr1_152285930  | 12 | chr12_6970635  | 2.332   | 6.724 | 0.009511 | FLG      | USP5      |
| 1  | chr1_152283236  | 12 | chr12_6970635  | 2.272   | 6.704 | 0.009618 | FLG      | USP5      |
| 1  | chr1_158549511  | 18 | chr18_12429313 | 0.7337  | 6.681 | 0.009743 | OR10X1   | PRELID3A  |
| 1  | chr1_152286367  | 2  | chr2_102984279 | 1.366   | 6.635 | 0.009999 | FLG      | IL18R1    |
