# Supplementary material for: Gene interaction analysis of psoriasis in Chinese Han population
Source: PubMed Central journal article supplement — Mol Genet Genomic Med. 2022 Mar 30;10(5):e1858. doi: 10.1002/mgg3.1858 (PMC9034666; doi:10.1002/mgg3.1858), 2022-03-30
Supplement: MGG3-10-e1858-s003.pdf [file MGG3-10-e1858-s003.pdf]

| CHR1 | SNP1        | CHR2 | SNP2         | OR_INT | STAT  | P         | gene1   | gene2   |
|------|-------------|------|--------------|--------|-------|-----------|---------|---------|
| 6    | C*06:02     | 6    | rs118179173  | 0.22   | 83    | 8.21E-20  | BTNL2   |         |
| 6    | C*06:02     | 6    | B:AA67       | 0.45   | 50.46 | 1.22E-12  |         |         |
| 5    | 5_96139250  | 6    | C*06:02      | 0.74   | 25.89 | 3.61E-07  | ERAP1   |         |
| 5    | 5_96117300  | 6    | C*06:02      | 0.75   | 22.93 | 1.68E-06  | ERAP1   |         |
| 6    | C*06:02     | 6    | C*07:04      | 0.28   | 20.23 | 6.86E-06  |         |         |
| 5    | 5_96118852  | 6    | C*06:02      | 0.78   | 17.16 | 3.43E-05  | ERAP1   |         |
| 5    | 5_96125910  | 6    | C*06:02      | 0.78   | 16.96 | 3.81E-05  | ERAP1   |         |
| 6    | snp31443520 | 6    | DPB1*05:01   | 1.47   | 16.08 | 6.07E-05  |         |         |
| 5    | 5_96124447  | 6    | C*06:02      | 0.79   | 15.97 | 6.44E-05  | ERAP1   |         |
| 5    | 5_96121994  | 6    | C*06:02      | 0.79   | 15.95 | 6.50E-05  | ERAP1   |         |
| 5    | 5_96121715  | 6    | C*06:02      | 0.79   | 15.82 | 6.96E-05  | ERAP1   |         |
| 5    | 5_96129512  | 6    | C*06:02      | 0.80   | 13.75 | 0.0002089 | ERAP1   |         |
| 5    | 5_96222183  | 6    | C*06:02      | 0.80   | 13.32 | 0.0002627 | ERAP2   |         |
| 6    | C*06:02     | 6    | DPB1*05:01   | 1.26   | 13.2  | 0.0002793 |         |         |
| 5    | 5_96222185  | 6    | C*06:02      | 0.81   | 11.94 | 0.0005506 | ERAP2   |         |
| 5    | 5_96232222  | 6    | C*06:02      | 0.82   | 10.96 | 0.0009334 | ERAP2   |         |
| 5    | 5_96237114  | 6    | C*06:02      | 0.82   | 10.93 | 0.0009459 | ERAP2   |         |
| 5    | 5_96132795  | 6    | C*06:02      | 0.77   | 10.84 | 0.0009922 | ERAP1   |         |
| 5    | 5_96249323  | 6    | C*06:02      | 0.82   | 10.47 | 0.001214  | ERAP2   |         |
| 3    | 3_121810428 | 5    | 5_96118852   | 3.16   | 10.13 | 0.001459  | CD86    | ERAP1   |
| 6    | B:Y140S     | 6    | B:Y91C       | 1.23   | 9.953 | 0.001606  |         |         |
| 5    | 5_96121069  | 16   | 16_10989630  | 6.71   | 9.898 | 0.001655  | CIITA   | ERAP1   |
| 1    | 1_152733376 | 19   | 19_49422277  | 5.93   | 9.862 | 0.001687  | KPRP    | NUCB1   |
| 3    | 3_121810428 | 5    | 5_96117300   | 3.23   | 9.719 | 0.001824  | CD86    | ERAP1   |
| 6    | C*06:02     | 12   | 12_111951144 | 0.14   | 9.433 | 0.002131  | ATXN2   |         |
| 5    | 5_158705519 | 6    | DPB1*05:01   | 1.49   | 9.373 | 0.002202  | UBLCP1  |         |
| 6    | C*07:04     | 6    | B:Y91C       | 2.27   | 9.264 | 0.002337  |         |         |
| 3    | 3_121810428 | 5    | 5_96121069   | 4.55   | 9.259 | 0.002343  | CD86    | ERAP1   |
| 5    | 5_96339273  | 6    | B:Y140S      | 1.13   | 8.487 | 0.003576  | LNPEP   |         |
| 19   | 19_10083664 | 20   | 20_48599549  | 0.51   | 8.48  | 0.003591  | COL5A3  | SNAI1   |
| 3    | 3_121810428 | 5    | 5_96252998   | 3.21   | 8.471 | 0.003609  | CD86    | ERAP2   |
| 1    | 1_67648596  | 17   | 17_78178170  | 1.31   | 8.353 | 0.00385   | CARD14  | IL23R   |
| 5    | 5_96124296  | 6    | C*06:02      | 1.33   | 8.152 | 0.004301  | ERAP1   |         |
| 5    | 5_96125910  | 5    | 5_96339273   | 0.89   | 8.122 | 0.004374  | ERAP1   | LNPEP   |
| 3    | 3_121810428 | 5    | 5_96125910   | 3.02   | 8.09  | 0.004452  | CD86    | ERAP1   |
| 3    | 3_121634170 | 14   | 14_35761675  | 0.39   | 7.983 | 0.004722  | PSMA6   | SLC15A2 |
| 3    | 3_121810428 | 5    | 5_96339273   | 2.53   | 7.618 | 0.005778  | CD86    | LNPEP   |
| 5    | 5_158705065 | 19   | 19_49656530  | 4.44   | 7.61  | 0.005804  | HRC     | UBLCP1  |
| 3    | 3_121810428 | 5    | 5_96232222   | 2.64   | 7.598 | 0.005842  | CD86    | ERAP2   |
| 16   | 16_31095251 | 20   | 20_48599549  | 0.84   | 7.584 | 0.00589   | PRSS53  | SNAI1   |
| 3    | 3_121634179 | 17   | 17_40459737  | 0.20   | 7.581 | 0.005899  | SLC15A2 | STAT5A  |
| 6    | B:Y140S     | 17   | 17_78178182  | 1.11   | 7.326 | 0.006798  | CARD14  |         |
| 5    | 5_96139250  | 5    | 5_96339273   | 0.90   | 7.313 | 0.006845  | ERAP1   | LNPEP   |
| 5    | 5_96232222  | 6    | snp31443520  | 1.29   | 7.268 | 0.007018  | ERAP2   |         |
| 3    | 3_121810428 | 5    | 5_96222183   | 2.59   | 7.229 | 0.007172  | CD86    | ERAP2   |
| 3    | 3_121810428 | 5    | 5_96121715   | 2.76   | 7.213 | 0.007236  | CD86    | ERAP1   |
| 3    | 3_121810428 | 5    | 5_96124447   | 2.61   | 7.141 | 0.007536  | CD86    | ERAP1   |
| 3    | 3_121810428 | 5    | 5_96237114   | 2.56   | 7.001 | 0.008145  | CD86    | ERAP2   |
| 3    | 3_121810428 | 5    | 5_96222185   | 2.55   | 6.928 | 0.008487  | CD86    | ERAP2   |
| 5    | 5_96125910  | 5    | 5_96252998   | 0.89   | 6.865 | 0.008789  | ERAP1   | ERAP2   |
| 17   | 17_38251343 | 17   | 17_40459737  | 10.22  | 6.844 | 0.008895  | NR1D1   | STAT5A  |
| 5    | 5_96232222  | 6    | B:Y140S      | 1.11   | 6.841 | 0.00891   | ERAP2   |         |
| 5    | 5_158750013 | 6    | C*06:02      | 1.17   | 6.727 | 0.009494  | IL12B   |         |
| 1    | 1_67648596  | 17   | 17_78178182  | 1.27   | 6.715 | 0.00956   | CARD14  | IL23R   |
| 3    | 3_121810428 | 5    | 5_96121994   | 2.55   | 6.707 | 0.009602  | CD86    | ERAP1   |
| 1    | 1_158990412 | 17   | 17_78178189  | 1.10   | 6.62  | 0.01009   | CARD14  | IFI16   |
| 5    | 5_96237114  | 6    | B:Y140S      | 1.10   | 6.612 | 0.01013   | ERAP2   |         |
| 5    | 5_96118852  | 5    | 5_96339273   | 0.90   | 6.604 | 0.01018   | ERAP1   | LNPEP   |
| 3    | 3_121810428 | 5    | 5_96129512   | 2.70   | 6.578 | 0.01032   | CD86    | ERAP1   |
| 1    | 1_158987941 | 17   | 17_78180618  | 0.91   | 6.525 | 0.01064   | CARD14  | IFI16   |

|    |             |    |             |       |       |         |           |              |
|----|-------------|----|-------------|-------|-------|---------|-----------|--------------|
| 5  | 5_96339273  | 6  | C*06:02     | 0.85  | 6.524 | 0.01065 | LNPEP     |              |
| 6  | B:Y140S     | 17 | 17_78178189 | 1.10  | 6.487 | 0.01087 | CARD14    |              |
| 5  | 5_96249323  | 16 | 16_10989630 | 3.38  | 6.484 | 0.01089 | CIITA     | ERAP2        |
| 3  | 3_121810428 | 5  | 5_96249323  | 2.48  | 6.476 | 0.01094 | CD86      | ERAP2        |
| 1  | 1_152759678 | 5  | 5_150513957 | 8.21  | 6.424 | 0.01126 | ANXA6     | LCE1E        |
| 1  | 1_152733376 | 4  | 4_103534560 | 0.82  | 6.376 | 0.01157 | KPRP      | NFKB1        |
| 5  | 5_96222183  | 6  | B:Y140S     | 1.10  | 6.368 | 0.01162 | ERAP2     |              |
| 14 | 14_35761675 | 17 | 17_40474471 | 0.47  | 6.362 | 0.01166 | PSMA6     | STAT3        |
| 5  | 5_96252998  | 6  | C*07:04     | 1.57  | 6.336 | 0.01183 | ERAP2     |              |
| 2  | 2_163149965 | 6  | C*06:02     | 1.29  | 6.281 | 0.0122  | IFIH1     |              |
| 5  | 5_96237114  | 6  | snp31443520 | 1.26  | 6.232 | 0.01255 | ERAP2     |              |
| 6  | B:Y140S     | 17 | 17_78178170 | 1.10  | 6.222 | 0.01261 | CARD14    |              |
| 2  | 2_61239020  | 2  | 2_163137683 | 3.46  | 6.21  | 0.0127  | IFIH1     | PUS10        |
| 1  | 1_152733376 | 5  | 5_158705519 | 0.55  | 6.199 | 0.01278 | KPRP      | UBLCP1       |
| 1  | 1_158987941 | 17 | 17_78178189 | 1.10  | 6.197 | 0.01279 | CARD14    | IFI16        |
| 6  | C*06:02     | 19 | 19_49416496 | 0.19  | 6.183 | 0.0129  | NUCB1-AS1 |              |
| 3  | 3_121810428 | 5  | 5_96139250  | 2.47  | 6.166 | 0.01302 | CD86      | ERAP1        |
| 2  | 2_61239020  | 2  | 2_163137695 | 3.45  | 6.161 | 0.01306 | IFIH1     | PUS10        |
| 2  | 2_61239020  | 2  | 2_163137871 | 3.44  | 6.138 | 0.01323 | IFIH1     | PUS10        |
| 5  | 5_96249323  | 6  | B:Y140S     | 1.10  | 6.127 | 0.01331 | ERAP2     |              |
| 5  | 5_96139250  | 5  | 5_96232222  | 0.92  | 6.117 | 0.01339 | ERAP1     | ERAP2        |
| 5  | 5_96139250  | 16 | 16_10989630 | 3.10  | 6.116 | 0.0134  | CIITA     | ERAP1        |
| 1  | 1_67648596  | 17 | 17_78178189 | 1.26  | 6.103 | 0.0135  | CARD14    | IL23R        |
| 2  | 2_163137871 | 4  | 4_103537442 | 1.15  | 6.097 | 0.01354 | IFIH1     | NFKB1        |
| 2  | 2_61108996  | 5  | 5_79732996  | 11.25 | 6.08  | 0.01367 | REL       | ZFYVE16      |
| 6  | rs118179173 | 20 | 20_48599549 | 0.80  | 6.048 | 0.01392 | SNAI1     |              |
| 5  | 5_96139250  | 5  | 5_96237114  | 0.92  | 6.003 | 0.01428 | ERAP1     | ERAP2        |
| 2  | 2_163137871 | 5  | 5_96132795  | 0.83  | 5.961 | 0.01462 | ERAP1     | IFIH1        |
| 5  | 5_96121715  | 5  | 5_96339273  | 0.91  | 5.924 | 0.01494 | ERAP1     | LNPEP        |
| 5  | 5_96125910  | 5  | 5_96222185  | 0.91  | 5.922 | 0.01495 | ERAP1     | ERAP2        |
| 2  | 2_61239020  | 2  | 2_163136727 | 3.36  | 5.923 | 0.01495 | IFIH1     | PUS10        |
| 5  | 5_96121715  | 17 | 17_78179386 | 0.06  | 5.912 | 0.01503 | CARD14    | ERAP1        |
| 5  | 5_96222185  | 6  | rs118179173 | 1.26  | 5.853 | 0.01555 | ERAP2     |              |
| 6  | B:Y140S     | 14 | 14_35761675 | 1.10  | 5.851 | 0.01557 | PSMA6     |              |
| 5  | 5_96222185  | 19 | 19_10083770 | 0.13  | 5.745 | 0.01654 | COL5A3    | ERAP2        |
| 5  | 5_96139250  | 5  | 5_96222183  | 0.92  | 5.736 | 0.01662 | ERAP1     | ERAP2        |
| 1  | 1_158986477 | 6  | 6_138539297 | 0.28  | 5.724 | 0.01673 | IFI16     | PBOV1        |
| 13 | 13_20763777 | 17 | 17_78178182 | 0.52  | 5.723 | 0.01675 | CARD14    | GJB2         |
| 5  | 5_96118852  | 5  | 5_96222185  | 0.92  | 5.721 | 0.01677 | ERAP1     | ERAP2        |
| 5  | 5_96125910  | 17 | 17_73997543 | 0.38  | 5.648 | 0.01747 | CDK3      | ERAP1        |
| 2  | 2_163149965 | 4  | 4_103537442 | 1.16  | 5.637 | 0.01758 | IFIH1     | NFKB1        |
| 5  | 5_96139250  | 5  | 5_96222185  | 0.92  | 5.624 | 0.01772 | ERAP1     | ERAP2        |
| 2  | 2_163137683 | 5  | 5_96132795  | 0.84  | 5.614 | 0.01782 | ERAP1     | IFIH1        |
| 14 | 14_35761675 | 19 | 19_10108794 | 4.90  | 5.607 | 0.01789 | COL5A3    | PSMA6        |
| 5  | 5_96249323  | 6  | rs118179173 | 1.25  | 5.599 | 0.01797 | ERAP2     |              |
| 2  | 2_163149965 | 14 | 14_35761675 | 1.15  | 5.597 | 0.01799 | IFIH1     | PSMA6        |
| 5  | 5_96125910  | 5  | 5_96237114  | 0.92  | 5.58  | 0.01817 | ERAP1     | ERAP2        |
| 1  | 1_158990412 | 17 | 17_78180618 | 0.92  | 5.545 | 0.01853 | CARD14    | IFI16        |
| 1  | 1_152759678 | 6  | DPB1*05:01  | 0.92  | 5.527 | 0.01872 | LCE1E     |              |
| 5  | 5_96222185  | 6  | B:Y140S     | 1.10  | 5.506 | 0.01895 | ERAP2     |              |
| 5  | 5_96139250  | 5  | 5_96249323  | 0.92  | 5.468 | 0.01937 | ERAP1     | ERAP2        |
| 5  | 5_96125910  | 5  | 5_96249323  | 0.92  | 5.459 | 0.01946 | ERAP1     | ERAP2        |
| 6  | B:Y91C      | 6  | DPB1*05:01  | 1.16  | 5.454 | 0.01953 |           |              |
| 2  | 2_163136727 | 4  | 4_103537442 | 1.14  | 5.448 | 0.01959 | IFIH1     | NFKB1        |
| 3  | 3_121634170 | 6  | C*06:02     | 5.09  | 5.444 | 0.01964 | SLC15A2   |              |
| 13 | 13_20763612 | 19 | 19_49422277 | 0.20  | 5.423 | 0.01987 | GJB2      | NUCB1        |
| 5  | 5_96125910  | 5  | 5_96222183  | 0.92  | 5.42  | 0.01991 | ERAP1     | ERAP2        |
| 5  | 5_96252998  | 6  | snp31443520 | 1.28  | 5.415 | 0.01997 | ERAP2     |              |
| 6  | 6_111896798 | 17 | 17_78178170 | 0.67  | 5.405 | 0.02008 | CARD14    | TRAF3IP2-AS1 |
| 2  | 2_61239020  | 2  | 2_163136771 | 3.24  | 5.396 | 0.02018 | IFIH1     | PUS10        |
| 2  | 2_163137683 | 16 | 16_11003052 | 4.53  | 5.39  | 0.02025 | CIITA     | IFIH1        |

|    |             |    |              |       |       |         |        |              |
|----|-------------|----|--------------|-------|-------|---------|--------|--------------|
| 2  | 2_163136771 | 16 | 16_11003052  | 4.53  | 5.375 | 0.02043 | CIITA  | IFIH1        |
| 2  | 2_163137695 | 16 | 16_11003052  | 4.52  | 5.363 | 0.02056 | CIITA  | IFIH1        |
| 1  | 1_158987941 | 17 | 17_78178182  | 1.09  | 5.346 | 0.02076 | CARD14 | IFI16        |
| 2  | 2_163136727 | 16 | 16_11003052  | 4.50  | 5.338 | 0.02086 | CIITA  | IFIH1        |
| 5  | 5_96124447  | 5  | 5_96252998   | 0.90  | 5.332 | 0.02094 | ERAP1  | ERAP2        |
| 5  | 5_96125910  | 10 | 10_89503220  | 3.89  | 5.332 | 0.02094 | ERAP1  | PAPSS2       |
| 2  | 2_163137871 | 16 | 16_11003052  | 4.50  | 5.331 | 0.02095 | CIITA  | IFIH1        |
| 5  | 5_158705065 | 5  | 5_158745889  | 3.27  | 5.322 | 0.02106 | IL12B  | UBLCP1       |
| 11 | 11_9983640  | 17 | 17_40459737  | 5.05  | 5.299 | 0.02134 | SBF2   | STAT5A       |
| 2  | 2_61108996  | 19 | 19_10114470  | 4.83  | 5.286 | 0.0215  | COL5A3 | REL          |
| 2  | 2_163136771 | 14 | 14_35761675  | 1.14  | 5.269 | 0.02171 | IFIH1  | PSMA6        |
| 6  | B:Y140S     | 17 | 17_78178830  | 0.92  | 5.265 | 0.02176 | CARD14 |              |
| 6  | DPB1*05:01  | 17 | 17_78156592  | 0.05  | 5.261 | 0.02181 | CARD14 |              |
| 1  | 1_158990412 | 5  | 5_96124296   | 0.87  | 5.254 | 0.0219  | ERAP1  | IFI16        |
| 5  | 5_96124296  | 17 | 17_40914660  | 15.10 | 5.213 | 0.02242 | ERAP1  | RAMP2        |
| 1  | 1_158986225 | 6  | 6_138539297  | 0.30  | 5.211 | 0.02245 | IFI16  | PBOV1        |
| 16 | 16_11003052 | 20 | 20_48467560  | 4.93  | 5.208 | 0.02248 | CIITA  | SLC9A8       |
| 6  | B:Y140S     | 17 | 17_26100284  | 0.38  | 5.207 | 0.0225  | NOS2   |              |
| 5  | 5_96252998  | 5  | 5_96339273   | 0.90  | 5.188 | 0.02274 | ERAP2  | LNPEP        |
| 1  | 1_7870754   | 1  | 1_158987941  | 0.32  | 5.188 | 0.02275 | IFI16  | PER3         |
| 5  | 5_96139250  | 17 | 17_73997543  | 0.43  | 5.18  | 0.02285 | CDK3   | ERAP1        |
| 1  | 1_152681704 | 6  | snp32472030  | 6.65  | 5.16  | 0.02312 | LCE4A  |              |
| 5  | 5_96125910  | 5  | 5_96232222   | 0.92  | 5.134 | 0.02346 | ERAP1  | ERAP2        |
| 1  | 1_67648596  | 19 | 19_10114470  | 13.12 | 5.129 | 0.02353 | COL5A3 | IL23R        |
| 6  | B:Y140S     | 17 | 17_40717939  | 0.55  | 5.122 | 0.02363 | COASY  |              |
| 6  | B:Y91C      | 12 | 12_111951144 | 15.96 | 5.118 | 0.02368 | ATXN2  |              |
| 5  | 5_96129512  | 19 | 19_10108794  | 0.15  | 5.118 | 0.02369 | COL5A3 | ERAP1        |
| 5  | 5_96232222  | 19 | 19_10083770  | 0.16  | 5.108 | 0.02381 | COL5A3 | ERAP2        |
| 5  | 5_96129512  | 19 | 19_49422277  | 0.46  | 5.107 | 0.02383 | ERAP1  | NUCB1        |
| 6  | 6_111896798 | 20 | 20_48599549  | 0.69  | 5.106 | 0.02384 | SNAI1  | TRAF3IP2-AS1 |
| 5  | 5_96222185  | 17 | 17_26100284  | 2.69  | 5.098 | 0.02395 | ERAP2  | NOS2         |
| 5  | 5_96222183  | 16 | 16_10989630  | 2.79  | 5.094 | 0.02401 | CIITA  | ERAP2        |
| 1  | 1_158986477 | 13 | 13_20763612  | 1.24  | 5.092 | 0.02404 | GJB2   | IFI16        |
| 16 | 16_31426307 | 17 | 17_78180618  | 0.40  | 5.091 | 0.02405 | CARD14 | ITGAD        |
| 5  | 5_96118852  | 5  | 5_96237114   | 0.92  | 5.082 | 0.02417 | ERAP1  | ERAP2        |
| 5  | 5_96125910  | 16 | 16_10989630  | 2.52  | 5.072 | 0.02431 | CIITA  | ERAP1        |
| 5  | 5_96222183  | 19 | 19_10083770  | 0.16  | 5.07  | 0.02435 | COL5A3 | ERAP2        |
| 5  | 5_96124447  | 5  | 5_96339273   | 0.91  | 5.066 | 0.0244  | ERAP1  | LNPEP        |
| 6  | 6_138539297 | 14 | 14_35761675  | 3.82  | 5.066 | 0.0244  | PBOV1  | PSMA6        |
| 1  | 1_152785272 | 20 | 20_48522585  | 5.61  | 5.04  | 0.02476 | LCE1B  | SPATA2       |
| 2  | 2_163137695 | 5  | 5_96132795   | 0.84  | 5.04  | 0.02477 | ERAP1  | IFIH1        |
| 5  | 5_158750013 | 19 | 19_49656530  | 0.31  | 5.012 | 0.02517 | HRC    | IL12B        |
| 2  | 2_163137871 | 6  | C*06:02      | 1.23  | 5.008 | 0.02523 | IFIH1  |              |
| 5  | 5_96125910  | 21 | 21_35174730  | 2.32  | 4.999 | 0.02536 | ERAP1  | ITSN1        |
| 19 | 19_49207009 | 20 | 20_48524827  | 4.24  | 4.954 | 0.02602 | FUT2   | SPATA2       |
| 4  | 4_103644076 | 5  | 5_96222185   | 0.33  | 4.937 | 0.02629 | ERAP2  | MANBA        |
| 5  | 5_96129512  | 12 | 12_6570086   | 0.11  | 4.919 | 0.02657 | ERAP1  | TAPBPL       |
| 1  | 1_152326252 | 13 | 13_20763612  | 0.20  | 4.912 | 0.02667 | FLG2   | GJB2         |
| 1  | 1_26358755  | 14 | 14_35761675  | 14.66 | 4.909 | 0.02672 | EXTL1  | PSMA6        |
| 2  | 2_163137695 | 4  | 4_103537442  | 1.14  | 4.9   | 0.02686 | IFIH1  | NFKB1        |
| 5  | 5_96139250  | 5  | 5_96252998   | 0.91  | 4.895 | 0.02694 | ERAP1  | ERAP2        |
| 2  | 2_163136771 | 4  | 4_103537442  | 1.14  | 4.87  | 0.02733 | IFIH1  | NFKB1        |
| 2  | 2_163136727 | 5  | 5_96132795   | 0.85  | 4.864 | 0.02742 | ERAP1  | IFIH1        |
| 4  | 4_103644076 | 17 | 17_78178189  | 0.30  | 4.847 | 0.0277  | CARD14 | MANBA        |
| 5  | 5_96252998  | 12 | 12_6928570   | 3.06  | 4.843 | 0.02776 | CD4    | ERAP2        |
| 5  | 5_96339273  | 17 | 17_78166385  | 0.89  | 4.837 | 0.02785 | CARD14 | LNPEP        |
| 1  | 1_158990412 | 5  | 5_96121715   | 1.09  | 4.835 | 0.02789 | ERAP1  | IFI16        |
| 6  | C*06:02     | 17 | 17_78178182  | 1.14  | 4.816 | 0.0282  | CARD14 |              |
| 2  | 2_163137871 | 14 | 14_35761675  | 1.13  | 4.802 | 0.02842 | IFIH1  | PSMA6        |
| 2  | 2_61239020  | 2  | 2_163149896  | 3.30  | 4.8   | 0.02846 | IFIH1  | PUS10        |
| 6  | B:Y33Y      | 17 | 17_26100284  | 5.46  | 4.784 | 0.02872 | NOS2   |              |

|    |             |    |             |      |       |         |        |              |
|----|-------------|----|-------------|------|-------|---------|--------|--------------|
| 2  | 2_163291617 | 14 | 14_35761675 | 1.16 | 4.765 | 0.02904 | KCNH7  | PSMA6        |
| 6  | snp32472030 | 17 | 17_78178189 | 0.85 | 4.76  | 0.02913 | CARD14 |              |
| 1  | 1_7870754   | 6  | C*06:02     | 0.31 | 4.745 | 0.02938 | PER3   |              |
| 5  | 5_96249323  | 19 | 19_10083770 | 0.16 | 4.736 | 0.02954 | COL5A3 | ERAP2        |
| 5  | 5_96118852  | 5  | 5_96222183  | 0.92 | 4.71  | 0.03    | ERAP1  | ERAP2        |
| 1  | 1_67648596  | 1  | 1_152733376 | 1.52 | 4.683 | 0.03046 | IL23R  | KPRP         |
| 5  | 5_96117300  | 5  | 5_96339273  | 0.92 | 4.673 | 0.03064 | ERAP1  | LNPEP        |
| 5  | 5_131720096 | 5  | 5_158750013 | 1.73 | 4.67  | 0.0307  | IL12B  | SLC22A5      |
| 5  | 5_96129512  | 5  | 5_96252998  | 0.91 | 4.667 | 0.03075 | ERAP1  | ERAP2        |
| 5  | 5_96117300  | 19 | 19_10108794 | 0.21 | 4.66  | 0.03087 | COL5A3 | ERAP1        |
| 5  | 5_96222183  | 17 | 17_26100284 | 2.55 | 4.659 | 0.03089 | ERAP2  | NOS2         |
| 6  | 6_111896798 | 17 | 17_78178189 | 0.69 | 4.657 | 0.03094 | CARD14 | TRAF3IP2-AS1 |
| 5  | 5_96121994  | 5  | 5_158750013 | 1.08 | 4.656 | 0.03095 | ERAP1  | IL12B        |
| 2  | 2_163149896 | 9  | 9_32632763  | 0.11 | 4.655 | 0.03097 | IFIH1  | TAF1L        |
| 2  | 2_61239020  | 2  | 2_163149965 | 3.28 | 4.651 | 0.03103 | IFIH1  | PUS10        |
| 5  | 5_96124447  | 5  | 5_96222185  | 0.92 | 4.649 | 0.03106 | ERAP1  | ERAP2        |
| 5  | 5_158705519 | 14 | 14_35761675 | 1.31 | 4.65  | 0.03106 | PSMA6  | UBLCP1       |
| 5  | 5_96121715  | 5  | 5_96222185  | 0.92 | 4.634 | 0.03134 | ERAP1  | ERAP2        |
| 1  | 1_152326252 | 5  | 5_96339273  | 0.44 | 4.632 | 0.03138 | FLG2   | LNPEP        |
| 1  | 1_158990412 | 17 | 17_78178182 | 1.08 | 4.616 | 0.03167 | CARD14 | IFI16        |
| 6  | C*06:02     | 17 | 17_78178830 | 0.88 | 4.613 | 0.03172 | CARD14 |              |
| 5  | 5_96339273  | 12 | 12_6928570  | 2.62 | 4.609 | 0.0318  | CD4    | LNPEP        |
| 5  | 5_96124447  | 5  | 5_96249323  | 0.92 | 4.601 | 0.03195 | ERAP1  | ERAP2        |
| 5  | 5_96249323  | 13 | 13_20763777 | 1.86 | 4.565 | 0.03263 | ERAP2  | GJB2         |
| 14 | 14_35761675 | 17 | 17_78178170 | 1.08 | 4.552 | 0.03288 | CARD14 | PSMA6        |
| 5  | 5_96339273  | 6  | C*07:04     | 1.41 | 4.542 | 0.03307 | LNPEP  |              |
| 6  | C*06:02     | 6  | B:Y33Y      | 1.17 | 4.518 | 0.03353 |        |              |
| 2  | 2_61239020  | 5  | 5_96139250  | 1.95 | 4.505 | 0.0338  | ERAP1  | PUS10        |
| 16 | 16_31426307 | 17 | 17_78166385 | 2.63 | 4.493 | 0.03404 | CARD14 | ITGAD        |
| 1  | 1_158986225 | 19 | 19_10102542 | 4.26 | 4.49  | 0.03409 | COL5A3 | IFI16        |
| 5  | 5_96237114  | 16 | 16_10989630 | 2.51 | 4.48  | 0.03429 | CIITA  | ERAP2        |
| 5  | 5_96121715  | 5  | 5_96237114  | 0.93 | 4.472 | 0.03446 | ERAP1  | ERAP2        |
| 2  | 2_163137871 | 4  | 4_103534560 | 1.12 | 4.469 | 0.03451 | IFIH1  | NFKB1        |
| 1  | 1_152733376 | 4  | 4_103514445 | 0.85 | 4.469 | 0.03451 | KPRP   | NFKB1        |
| 3  | 3_121810428 | 13 | 13_20763612 | 6.03 | 4.467 | 0.03455 | CD86   | GJB2         |
| 5  | 5_96222185  | 16 | 16_10989630 | 2.49 | 4.463 | 0.03465 | CIITA  | ERAP2        |
| 5  | 5_96232222  | 16 | 16_10989630 | 2.50 | 4.457 | 0.03475 | CIITA  | ERAP2        |
| 2  | 2_61239020  | 5  | 5_96252998  | 2.14 | 4.441 | 0.03509 | ERAP2  | PUS10        |
| 1  | 1_67648596  | 17 | 17_78178830 | 0.83 | 4.428 | 0.03536 | CARD14 | IL23R        |
| 1  | 1_67648596  | 17 | 17_78156592 | 0.05 | 4.42  | 0.03552 | CARD14 | IL23R        |
| 5  | 5_96118852  | 5  | 5_96249323  | 0.93 | 4.406 | 0.03581 | ERAP1  | ERAP2        |
| 5  | 5_96121715  | 10 | 10_89503220 | 3.17 | 4.401 | 0.03592 | ERAP1  | PAPSS2       |
| 5  | 5_96237114  | 13 | 13_20763777 | 1.84 | 4.401 | 0.03593 | ERAP2  | GJB2         |
| 5  | 5_96121715  | 5  | 5_96249323  | 0.93 | 4.392 | 0.03611 | ERAP1  | ERAP2        |
| 1  | 1_7870754   | 1  | 1_158986225 | 0.37 | 4.392 | 0.03611 | IFI16  | PER3         |
| 5  | 5_96121994  | 12 | 12_6570086  | 0.15 | 4.392 | 0.03612 | ERAP1  | TAPBPL       |
| 5  | 5_158705519 | 17 | 17_78166385 | 1.46 | 4.373 | 0.0365  | CARD14 | UBLCP1       |
| 2  | 2_163137695 | 6  | C*06:02     | 1.22 | 4.371 | 0.03655 | IFIH1  |              |
| 2  | 2_163136771 | 5  | 5_96132795  | 0.85 | 4.359 | 0.0368  | ERAP1  | IFIH1        |
| 5  | 5_96339273  | 8  | 8_3226851   | 2.70 | 4.358 | 0.03684 | CSMD1  | LNPEP        |
| 5  | 5_96129512  | 17 | 17_73997543 | 0.46 | 4.353 | 0.03694 | CDK3   | ERAP1        |
| 2  | 2_163149965 | 9  | 9_32632763  | 0.12 | 4.335 | 0.03733 | IFIH1  | TAF1L        |
| 19 | 19_49207009 | 20 | 20_48522585 | 3.87 | 4.332 | 0.03739 | FUT2   | SPATA2       |
| 6  | B:Y140S     | 16 | 16_31230499 | 0.25 | 4.307 | 0.03796 | TRIM72 |              |
| 5  | 5_96121994  | 19 | 19_10108794 | 0.22 | 4.306 | 0.03798 | COL5A3 | ERAP1        |
| 17 | 17_78180618 | 19 | 19_10462241 | 3.96 | 4.304 | 0.03802 | CARD14 | TYK2         |
| 5  | 5_96237114  | 19 | 19_10083770 | 0.18 | 4.293 | 0.03827 | COL5A3 | ERAP2        |
| 6  | 6_111896798 | 17 | 17_78178830 | 1.43 | 4.291 | 0.03831 | CARD14 | TRAF3IP2-AS1 |
| 1  | 1_152785272 | 20 | 20_48524827 | 4.55 | 4.282 | 0.03852 | LCE1B  | SPATA2       |
| 5  | 5_96118852  | 5  | 5_96232222  | 0.93 | 4.278 | 0.0386  | ERAP1  | ERAP2        |
| 1  | 1_152759678 | 5  | 5_150509088 | 1.97 | 4.273 | 0.03872 | ANXA6  | LCE1E        |

|    |              |    |             |      |       |         |         |         |
|----|--------------|----|-------------|------|-------|---------|---------|---------|
| 6  | snp32472030  | 17 | 17_78178830 | 1.17 | 4.264 | 0.03893 | CARD14  |         |
| 5  | 5_96118852   | 17 | 17_73997543 | 0.48 | 4.259 | 0.03905 | CDK3    | ERAP1   |
| 5  | 5_96125910   | 19 | 19_10108794 | 0.22 | 4.252 | 0.03921 | COL5A3  | ERAP1   |
| 2  | 2_163291617  | 5  | 5_96249323  | 1.15 | 4.251 | 0.03922 | ERAP2   | KCNH7   |
| 5  | 5_96252998   | 17 | 17_73997543 | 0.43 | 4.245 | 0.03936 | CDK3    | ERAP2   |
| 2  | 2_61239020   | 5  | 5_96237114  | 2.13 | 4.245 | 0.03936 | ERAP2   | PUS10   |
| 5  | 5_96222183   | 6  | snp31443520 | 1.21 | 4.233 | 0.03964 | ERAP2   |         |
| 1  | 1_158987941  | 17 | 17_78178170 | 1.08 | 4.231 | 0.0397  | CARD14  | IFI16   |
| 5  | 5_158750013  | 8  | 8_3226851   | 0.41 | 4.225 | 0.03983 | CSMD1   | IL12B   |
| 5  | 5_96117300   | 17 | 17_78179386 | 0.19 | 4.224 | 0.03985 | CARD14  | ERAP1   |
| 5  | 5_96125910   | 12 | 12_6570086  | 0.15 | 4.221 | 0.03992 | ERAP1   | TAPBPL  |
| 2  | 2_163137683  | 6  | C*06:02     | 1.21 | 4.221 | 0.03994 | IFIH1   |         |
| 5  | 5_96124447   | 5  | 5_96237114  | 0.93 | 4.218 | 0.03999 | ERAP1   | ERAP2   |
| 6  | DPB1*05:01   | 13 | 13_20763777 | 1.80 | 4.218 | 0.04    | GJB2    |         |
| 2  | 2_61239020   | 5  | 5_96232222  | 2.12 | 4.211 | 0.04016 | ERAP2   | PUS10   |
| 1  | 1_158986225  | 13 | 13_20763612 | 1.22 | 4.206 | 0.04028 | GJB2    | IFI16   |
| 3  | 3_121634179  | 6  | DPB1*05:01  | 0.33 | 4.206 | 0.04029 | SLC15A2 |         |
| 1  | 1_158986477  | 19 | 19_10102542 | 4.04 | 4.203 | 0.04035 | COL5A3  | IFI16   |
| 2  | 2_163137683  | 4  | 4_103537442 | 1.13 | 4.203 | 0.04035 | IFIH1   | NFKB1   |
| 6  | snp32472030  | 17 | 17_78178182 | 0.86 | 4.19  | 0.04065 | CARD14  |         |
| 13 | 13_40253646  | 17 | 17_78166385 | 4.94 | 4.189 | 0.0407  | CARD14  | COG6    |
| 5  | 5_96117300   | 12 | 12_6570086  | 0.16 | 4.172 | 0.04109 | ERAP1   | TAPBPL  |
| 6  | B:Y33Y       | 17 | 17_78156592 | 0.20 | 4.171 | 0.04111 | CARD14  |         |
| 5  | 5_96232222   | 13 | 13_20763777 | 1.80 | 4.17  | 0.04113 | ERAP2   | GJB2    |
| 2  | 2_163136727  | 14 | 14_35761675 | 1.12 | 4.159 | 0.04141 | IFIH1   | PSMA6   |
| 5  | 5_96252998   | 6  | C*06:02     | 0.87 | 4.158 | 0.04144 | ERAP2   |         |
| 1  | 1_152681704  | 4  | 4_103534560 | 2.15 | 4.144 | 0.04179 | LCE4A   | NFKB1   |
| 16 | 16_31095251  | 21 | 21_35174730 | 4.14 | 4.132 | 0.04207 | ITSN1   | PRSS53  |
| 5  | 5_96124447   | 5  | 5_96232222  | 0.93 | 4.132 | 0.04208 | ERAP1   | ERAP2   |
| 4  | 4_103644076  | 17 | 17_78178830 | 2.70 | 4.131 | 0.0421  | CARD14  | MANBA   |
| 5  | 5_96121715   | 5  | 5_96222183  | 0.93 | 4.129 | 0.04215 | ERAP1   | ERAP2   |
| 19 | 19_53453735  | 20 | 20_48524827 | 2.81 | 4.115 | 0.04249 | SPATA2  | ZNF816  |
| 6  | B:Y33Y       | 16 | 16_31230499 | 4.25 | 4.113 | 0.04256 | TRIM72  |         |
| 1  | 1_152785272  | 6  | B:Y140S     | 0.23 | 4.107 | 0.0427  | LCE1B   |         |
| 5  | 5_96339273   | 6  | snp31443520 | 1.22 | 4.104 | 0.04278 | LNPEP   |         |
| 5  | 5_96132795   | 19 | 19_49207009 | 0.19 | 4.104 | 0.04279 | ERAP1   | FUT2    |
| 5  | 5_96124447   | 17 | 17_73997543 | 0.47 | 4.079 | 0.04341 | CDK3    | ERAP1   |
| 5  | 5_96121715   | 12 | 12_6570086  | 0.16 | 4.062 | 0.04387 | ERAP1   | TAPBPL  |
| 5  | 5_96125910   | 6  | B:Y140S     | 1.08 | 4.058 | 0.04395 | ERAP1   |         |
| 5  | 5_96232222   | 6  | B:Y91C      | 1.13 | 4.051 | 0.04415 | ERAP2   |         |
| 6  | snp32472030  | 13 | 13_40253646 | 4.79 | 4.022 | 0.04491 | COG6    |         |
| 4  | 4_103644076  | 5  | 5_96232222  | 0.39 | 4.021 | 0.04495 | ERAP2   | MANBA   |
| 1  | 1_7870754    | 5  | 5_96132795  | 3.36 | 4.015 | 0.04509 | ERAP1   | PER3    |
| 4  | 4_103644076  | 5  | 5_96237114  | 0.39 | 4.014 | 0.04511 | ERAP2   | MANBA   |
| 5  | 5_96124447   | 5  | 5_96222183  | 0.93 | 4.005 | 0.04537 | ERAP1   | ERAP2   |
| 11 | 11_128442968 | 17 | 17_78166385 | 5.35 | 3.999 | 0.04553 | CARD14  | ETS1    |
| 5  | 5_96121715   | 5  | 5_96252998  | 0.91 | 3.999 | 0.04553 | ERAP1   | ERAP2   |
| 2  | 2_163149965  | 12 | 12_6161963  | 0.11 | 3.998 | 0.04556 | IFIH1   | VWF     |
| 1  | 1_158987941  | 5  | 5_96121715  | 1.08 | 3.995 | 0.04563 | ERAP1   | IFI16   |
| 5  | 5_79732996   | 20 | 20_48467560 | 6.50 | 3.985 | 0.04591 | SLC9A8  | ZFYVE16 |
| 14 | 14_35761675  | 17 | 17_78178182 | 1.08 | 3.984 | 0.04594 | CARD14  | PSMA6   |
| 5  | 5_96125910   | 17 | 17_78179386 | 0.24 | 3.979 | 0.04606 | CARD14  | ERAP1   |
| 2  | 2_163136771  | 6  | C*06:02     | 1.21 | 3.975 | 0.04618 | IFIH1   |         |
| 5  | 5_96117300   | 16 | 16_10989630 | 2.22 | 3.972 | 0.04625 | CIITA   | ERAP1   |
| 6  | C*06:02      | 17 | 17_78178189 | 1.13 | 3.972 | 0.04626 | CARD14  |         |
| 17 | 17_78178170  | 19 | 19_10090489 | 3.85 | 3.968 | 0.04638 | CARD14  | COL5A3  |
| 5  | 5_96118852   | 19 | 19_10108794 | 0.23 | 3.966 | 0.04644 | COL5A3  | ERAP1   |
| 2  | 2_163149965  | 4  | 4_103534560 | 1.13 | 3.965 | 0.04644 | IFIH1   | NFKB1   |
| 1  | 1_234582720  | 17 | 17_78180618 | 5.49 | 3.964 | 0.04648 | CARD14  | TARBP1  |
| 5  | 5_96139250   | 11 | 11_9990163  | 0.24 | 3.95  | 0.04686 | ERAP1   | SBF2    |
| 6  | DPB1*05:01   | 17 | 17_73997543 | 0.47 | 3.947 | 0.04695 | CDK3    |         |

|    |              |    |             |      |       |         |        |           |
|----|--------------|----|-------------|------|-------|---------|--------|-----------|
| 2  | 2_163291617  | 5  | 5_96237114  | 1.15 | 3.944 | 0.04703 | ERAP2  | KCNH7     |
| 4  | 4_103534560  | 12 | 12_6638975  | 0.31 | 3.938 | 0.04721 | NCAPD2 | NFKB1     |
| 2  | 2_163137683  | 11 | 11_9990163  | 5.91 | 3.928 | 0.04749 | IFIH1  | SBF2      |
| 10 | 10_102240949 | 17 | 17_78178830 | 0.25 | 3.921 | 0.04769 | CARD14 | WNT8B     |
| 2  | 2_61108996   | 5  | 5_150509088 | 2.69 | 3.919 | 0.04774 | ANXA6  | REL       |
| 10 | 10_102240949 | 17 | 17_78178182 | 3.95 | 3.913 | 0.04792 | CARD14 | WNT8B     |
| 1  | 1_158986477  | 17 | 17_40717939 | 0.56 | 3.903 | 0.04819 | COASY  | IFI16     |
| 5  | 5_96121994   | 5  | 5_96339273  | 0.93 | 3.896 | 0.04839 | ERAP1  | LNPEP     |
| 2  | 2_163137695  | 11 | 11_9990163  | 5.87 | 3.896 | 0.0484  | IFIH1  | SBF2      |
| 6  | B:Y33Y       | 6  | snp32472030 | 0.83 | 3.896 | 0.04841 |        |           |
| 5  | 5_96237114   | 17 | 17_26100284 | 2.35 | 3.89  | 0.04857 | ERAP2  | NOS2      |
| 2  | 2_163136727  | 11 | 11_9990163  | 5.85 | 3.883 | 0.04878 | IFIH1  | SBF2      |
| 1  | 1_159002778  | 1  | 1_234582720 | 3.65 | 3.878 | 0.04893 | IFI16  | TARBP1    |
| 6  | B:Y33Y       | 11 | 11_9983640  | 3.47 | 3.877 | 0.04894 | SBF2   |           |
| 5  | 5_96232222   | 17 | 17_26100284 | 2.35 | 3.867 | 0.04924 | ERAP2  | NOS2      |
| 5  | 5_96121715   | 19 | 19_10108794 | 0.24 | 3.853 | 0.04964 | COL5A3 | ERAP1     |
| 10 | 10_102240949 | 17 | 17_78178170 | 3.94 | 3.852 | 0.0497  | CARD14 | WNT8B     |
| 2  | 2_163149896  | 3  | 3_121634170 | 0.36 | 3.852 | 0.0497  | IFIH1  | SLC15A2   |
| 4  | 4_103644076  | 17 | 17_78178182 | 0.38 | 3.849 | 0.04977 | CARD14 | MANBA     |
| 5  | 5_96121715   | 5  | 5_96232222  | 0.93 | 3.849 | 0.04977 | ERAP1  | ERAP2     |
| 5  | 5_131647989  | 17 | 17_78178830 | 0.47 | 3.846 | 0.04986 | CARD14 | LOC553103 |
| 5  | 5_96339273   | 16 | 16_10989630 | 2.40 | 3.843 | 0.04996 | CIITA  | LNPEP     |
| 5  | 5_158750013  | 6  | B:Y91C      | 0.89 | 3.843 | 0.04996 | IL12B  |           |
| 1  | 1_152384498  | 5  | 5_96124296  | 0.20 | 3.843 | 0.04997 | CRNN   | ERAP1     |
